# Supplementary material for: Noncovalent antibody catenation on a target surface greatly increases the antigen-binding avidity
Source: eLife journal article supplement (doi:10.7554/elife.81646), 2023-05-12
Supplement: code1 [file excel_BSoccupancy.xlsx]

## Sheet: Sheet1
			1e-08	0.98599	1e-08	0.992621	1e-08	0.995042	1e-08	0.996763	1e-08	0.1
			1.4251e-08	0.986882	1.4251e-08	0.993266	1.4251e-08	0.995472	1.4251e-08	0.997063	0.00025642	0.1
			2.03092e-08	0.988251	2.03092e-08	0.994012	2.03092e-08	0.995901	2.03092e-08	0.997349	0.00051283	0.1
			2.89427e-08	0.989595	2.89427e-08	0.994772	2.89427e-08	0.996524	2.89427e-08	0.99765	0.00076924	0.1
			4.12463e-08	0.991076	4.12463e-08	0.995518	4.12463e-08	0.996985	4.12463e-08	0.998093	0.00102565	0.1
			5.87802e-08	0.992486	5.87802e-08	0.996418	5.87802e-08	0.99753	5.87802e-08	0.998622	0.00128206	0.1
			8.37678e-08	0.993983	8.37678e-08	0.997151	8.37678e-08	0.998098	8.37678e-08	0.999022	0.00153847	0.1
			1.19378e-07	0.995294	1.19378e-07	0.997836	1.19378e-07	0.998687	1.19378e-07	0.99939	0.00179488	0.1
			1.70125e-07	0.996505	1.70125e-07	0.998445	1.70125e-07	0.999102	1.70125e-07	0.999594	0.00205129	0.1
			2.42446e-07	0.997175	2.42446e-07	0.99887	2.42446e-07	0.999282	2.42446e-07	0.999655	0.0023077	0.1
			3.45511e-07	0.997656	3.45511e-07	0.999	3.45511e-07	0.999351	3.45511e-07	0.999612	0.00256411	0.1
			4.92388e-07	0.997606	4.92388e-07	0.998906	4.92388e-07	0.999345	4.92388e-07	0.999575	0.00282052	0.1
			7.01704e-07	0.997413	7.01704e-07	0.998774	7.01704e-07	0.999207	7.01704e-07	0.999464	0.00307693	0.1
			1e-06	0.9967	1e-06	0.998484	1e-06	0.998959	1e-06	0.999301	0.00333334	0.1
			1.4251e-06	0.995744	1.4251e-06	0.997941	1.4251e-06	0.998674	1.4251e-06	0.999108	0.00358975	0.1
			2.03092e-06	0.994292	2.03092e-06	0.997253	2.03092e-06	0.998215	2.03092e-06	0.998663	0.00384616	0.1
			2.89427e-06	0.992284	2.89427e-06	0.996288	2.89427e-06	0.997611	2.89427e-06	0.998188	0.00410257	0.1
			4.12463e-06	0.988963	4.12463e-06	0.994914	4.12463e-06	0.996627	4.12463e-06	0.997434	0.00435898	0.1
			5.87802e-06	0.984458	5.87802e-06	0.992782	5.87802e-06	0.995224	5.87802e-06	0.996461	0.00461539	0.1
			8.37678e-06	0.978112	8.37678e-06	0.989866	8.37678e-06	0.993193	8.37678e-06	0.995023	0.0048718	0.1
			1.19378e-05	0.96904	1.19378e-05	0.985547	1.19378e-05	0.99043	1.19378e-05	0.992805	0.00512821	0.1
			1.70125e-05	0.956025	1.70125e-05	0.979446	1.70125e-05	0.986208	1.70125e-05	0.989854	0.00538462	0.1
			2.42446e-05	0.938215	2.42446e-05	0.970622	2.42446e-05	0.980757	2.42446e-05	0.985812	0.00564103	0.1
			3.45511e-05	0.911995	3.45511e-05	0.958473	3.45511e-05	0.972631	3.45511e-05	0.979492	0.00589744	0.1
			4.92388e-05	0.87605	4.92388e-05	0.941426	4.92388e-05	0.961355	4.92388e-05	0.971127	0.00615385	0.1
			7.01704e-05	0.825602	7.01704e-05	0.917606	7.01704e-05	0.945638	7.01704e-05	0.959512	0.00641026	0.1
			0.0001	0.755913	0.0001	0.883961	0.0001	0.923137	0.0001	0.942381	0.00666667	0.1
			0.00014251	0.659006	0.00014251	0.836918	0.00014251	0.89207	0.00014251	0.918823	0.00692308	0.1
			0.000203092	0.532892	0.000203092	0.772439	0.000203092	0.848851	0.000203092	0.886866	0.00717949	0.1
			0.000289427	0.385607	0.000289427	0.685053	0.000289427	0.788287	0.000289427	0.841014	0.0074359	0.1
			0.000412463	0.259261	0.000412463	0.569843	0.000412463	0.707769	0.000412463	0.778197	0.00769231	0.1
			0.000587802	0.183	0.000587802	0.430962	0.000587802	0.600434	0.000587802	0.693902	0.00794872	0.1
			0.000837678	0.142599	0.000837678	0.294538	0.000837678	0.466551	0.000837678	0.583449	0.00820513	0.1
			0.00119378	0.122113	0.00119378	0.201238	0.00119378	0.328112	0.00119378	0.4489	0.00846154	0.1
			0.00170125	0.110724	0.00170125	0.151279	0.00170125	0.220919	0.00170125	0.311181	0.00871795	0.1
			0.00242446	0.103258	0.00242446	0.126773	0.00242446	0.161624	0.00242446	0.211306	0.00897436	0.1
			0.00345511	0.0988322	0.00345511	0.112766	0.00345511	0.131055	0.00345511	0.15614	0.00923077	0.1
			0.00492388	0.0970931	0.00492388	0.105039	0.00492388	0.115867	0.00492388	0.128822	0.00948718	0.1
			0.00701704	0.0941715	0.00701704	0.100247	0.00701704	0.106452	0.00701704	0.113951	0.00974359	0.1
			0.01	0.0938713	0.01	0.0971655	0.01	0.101721	0.01	0.105704	0.01	0.1
