# Supplementary material for: Noncovalent antibody catenation on a target surface greatly increases the antigen-binding avidity
Source: eLife journal article supplement (doi:10.7554/elife.81646), 2023-05-12
Supplement: code1 [file excel_KDeff.xlsx]

## Sheet: Sheet1
			1e-08	1.42087e-11	1e-08	7.43339e-12	1e-08	4.98293e-12	1e-08	3.2472e-12	1e-08	1e-08
			1.4251e-08	1.32929e-11	1.4251e-08	6.77966e-12	1.4251e-08	4.54859e-12	1.4251e-08	2.94566e-12	0.00025642	1e-08
			2.03092e-08	1.18885e-11	2.03092e-08	6.02362e-12	2.03092e-08	4.11627e-12	2.03092e-08	2.65842e-12	0.00051283	1e-08
			2.89427e-08	1.05147e-11	2.89427e-08	5.25513e-12	2.89427e-08	3.48814e-12	2.89427e-08	2.35539e-12	0.00076924	1e-08
			4.12463e-08	9.00451e-12	4.12463e-08	4.5026e-12	4.12463e-08	3.02453e-12	4.12463e-08	1.91099e-12	0.00102565	1e-08
			5.87802e-08	7.57072e-12	5.87802e-08	3.59503e-12	5.87802e-08	2.47628e-12	5.87802e-08	1.38008e-12	0.00128206	1e-08
			8.37678e-08	6.05368e-12	8.37678e-08	2.85726e-12	8.37678e-08	1.90575e-12	8.37678e-08	9.79352e-13	0.00153847	1e-08
			1.19378e-07	4.72847e-12	1.19378e-07	2.16839e-12	1.19378e-07	1.31466e-12	1.19378e-07	6.10113e-13	0.00179488	1e-08
			1.70125e-07	3.50754e-12	1.70125e-07	1.55699e-12	1.70125e-07	8.99245e-13	1.70125e-07	4.06659e-13	0.00205129	1e-08
			2.42446e-07	2.83271e-12	2.42446e-07	1.13165e-12	2.42446e-07	7.18289e-13	2.42446e-07	3.44968e-13	0.0023077	1e-08
			3.45511e-07	2.34926e-12	3.45511e-07	1.00137e-12	3.45511e-07	6.49293e-13	3.45511e-07	3.87724e-13	0.00256411	1e-08
			4.92388e-07	2.39995e-12	4.92388e-07	1.09556e-12	4.92388e-07	6.55269e-13	4.92388e-07	4.24985e-13	0.00282052	1e-08
			7.01704e-07	2.59379e-12	7.01704e-07	1.22709e-12	7.01704e-07	7.93815e-13	7.01704e-07	5.36787e-13	0.00307693	1e-08
			1e-06	3.31089e-12	1e-06	1.5178e-12	1e-06	1.04167e-12	1e-06	6.99341e-13	0.00333334	1e-08
			1.4251e-06	4.27438e-12	1.4251e-06	2.06296e-12	1.4251e-06	1.32772e-12	1.4251e-06	8.9252e-13	0.00358975	1e-08
			2.03092e-06	5.74078e-12	2.03092e-06	2.75415e-12	2.03092e-06	1.78868e-12	2.03092e-06	1.33907e-12	0.00384616	1e-08
			2.89427e-06	7.77648e-12	2.89427e-06	3.72599e-12	2.89427e-06	2.39505e-12	2.89427e-06	1.81542e-12	0.00410257	1e-08
			4.12463e-06	1.116e-11	4.12463e-06	5.11206e-12	4.12463e-06	3.38435e-12	4.12463e-06	2.57252e-12	0.00435898	1e-08
			5.87802e-06	1.57874e-11	5.87802e-06	7.2705e-12	5.87802e-06	4.7994e-12	5.87802e-06	3.552e-12	0.00461539	1e-08
			8.37678e-06	2.23778e-11	8.37678e-06	1.02374e-11	8.37678e-06	6.85329e-12	8.37678e-06	5.00232e-12	0.0048718	1e-08
			1.19378e-05	3.19495e-11	1.19378e-05	1.46651e-11	1.19378e-05	9.66224e-12	1.19378e-05	7.24696e-12	0.00512821	1e-08
			1.70125e-05	4.59982e-11	1.70125e-05	2.09849e-11	1.70125e-05	1.39852e-11	1.70125e-05	1.02499e-11	0.00538462	1e-08
			2.42446e-05	6.58534e-11	2.42446e-05	3.02672e-11	2.42446e-05	1.96207e-11	2.42446e-05	1.43924e-11	0.00564103	1e-08
			3.45511e-05	9.64977e-11	3.45511e-05	4.33263e-11	3.45511e-05	2.81394e-11	3.45511e-05	2.09372e-11	0.00589744	1e-08
			4.92388e-05	1.41488e-10	4.92388e-05	6.22186e-11	4.92388e-05	4.01988e-11	4.92388e-05	2.97311e-11	0.00615385	1e-08
			7.01704e-05	2.11237e-10	7.01704e-05	8.97928e-11	7.01704e-05	5.74871e-11	7.01704e-05	4.21968e-11	0.00641026	1e-08
			0.0001	3.22903e-10	0.0001	1.31271e-10	0.0001	8.32623e-11	0.0001	6.1142e-11	0.00666667	1e-08
			0.00014251	5.17438e-10	0.00014251	1.94861e-10	0.00014251	1.20989e-10	0.00014251	8.83486e-11	0.00692308	1e-08
			0.000203092	8.76552e-10	0.000203092	2.94601e-10	0.000203092	1.78063e-10	0.000203092	1.27565e-10	0.00717949	1e-08
			0.000289427	1.59331e-09	0.000289427	4.59741e-10	0.000289427	2.68574e-10	0.000289427	1.89041e-10	0.0074359	1e-08
			0.000412463	2.85712e-09	0.000412463	7.54871e-10	0.000412463	4.1289e-10	0.000412463	2.85022e-10	0.00769231	1e-08
			0.000587802	4.46449e-09	0.000587802	1.32039e-09	0.000587802	6.65462e-10	0.000587802	4.41126e-10	0.00794872	1e-08
			0.000837678	6.01266e-09	0.000837678	2.39515e-09	0.000837678	1.14339e-09	0.000837678	7.13946e-10	0.00820513	1e-08
			0.00119378	7.18911e-09	0.00119378	3.96923e-09	0.00119378	2.04774e-09	0.00119378	1.22767e-09	0.00846154	1e-08
			0.00170125	8.03144e-09	0.00170125	5.61029e-09	0.00170125	3.52654e-09	0.00170125	2.21356e-09	0.00871795	1e-08
			0.00242446	8.68444e-09	0.00242446	6.88811e-09	0.00242446	5.18719e-09	0.00242446	3.73247e-09	0.00897436	1e-08
			0.00345511	9.11816e-09	0.00345511	7.86791e-09	0.00345511	6.63037e-09	0.00345511	5.4045e-09	0.00923077	1e-08
			0.00492388	9.29939e-09	0.00492388	8.52027e-09	0.00492388	7.63059e-09	0.00492388	6.76265e-09	0.00948718	1e-08
			0.00701704	9.61892e-09	0.00701704	8.9754e-09	0.00701704	8.39387e-09	0.00701704	7.77572e-09	0.00974359	1e-08
			0.01	9.65289e-09	0.01	9.29172e-09	0.01	8.83077e-09	0.01	8.4604e-09	0.01	1e-08
