# Supplementary material for: Noncovalent antibody catenation on a target surface greatly increases the antigen-binding avidity
Source: eLife journal article supplement (doi:10.7554/elife.81646), 2023-05-12
Supplement: code1 [file Source Data.xlsx]

## Sheet: Data1_individual_simulations
Square
kD_catenator	Binding Occupancy
1e-11	0.8673
1.4251e-11	0.9184
2.0309e-11	0.8571
2.8943e-11	0.9082
4.1246e-11	0.8878
5.878e-11	0.9082
8.3768e-11	0.9184
1.1938e-10	0.8469
1.7013e-10	0.8776
2.4245e-10	0.8673
3.4551e-10	0.898
4.9239e-10	0.8571
7.017e-10	0.8776
1e-09	0.8571
1.4251e-09	0.8878
2.0309e-09	0.898
2.8943e-09	0.8061
4.1246e-09	0.5408
5.878e-09	0.602
8.3768e-09	0.5612
1.1938e-08	0.3878
1.7013e-08	0.2755
2.4245e-08	0.1735
3.4551e-08	0.1327
4.9239e-08	0.1122
7.017e-08	0.0816
1e-07	0.1327
1.4251e-07	0.0612
2.0309e-07	0.0612
2.8943e-07	0.0612
4.1246e-07	0.1122
5.878e-07	0.1122
8.3768e-07	0.1224
1.1938e-06	0.1122
1.7013e-06	0.0918
2.4245e-06	0.1122
3.4551e-06	0.102
4.9239e-06	0.0204
7.017e-06	0.1429
1e-05	0.0918
1e-11	0.898
1.4251e-11	0.898
2.0309e-11	0.9184
2.8943e-11	0.898
4.1246e-11	0.8571
5.878e-11	0.8469
8.3768e-11	0.8878
1.1938e-10	0.8673
1.7013e-10	0.8469
2.4245e-10	0.9286
3.4551e-10	0.8469
4.9239e-10	0.898
7.017e-10	0.8163
1e-09	0.9286
1.4251e-09	0.8878
2.0309e-09	0.7857
2.8943e-09	0.7449
4.1246e-09	0.6939
5.878e-09	0.602
8.3768e-09	0.4082
1.1938e-08	0.4184
1.7013e-08	0.1735
2.4245e-08	0.1633
3.4551e-08	0.2143
4.9239e-08	0.1122
7.017e-08	0.1122
1e-07	0.0816
1.4251e-07	0.0918
2.0309e-07	0.0918
2.8943e-07	0.0816
4.1246e-07	0.0918
5.878e-07	0.102
8.3768e-07	0.1122
1.1938e-06	0.0816
1.7013e-06	0.0918
2.4245e-06	0.0816
3.4551e-06	0.0102
4.9239e-06	0.1122
7.017e-06	0.102
1e-05	0.051
1e-11	0.8673
1.4251e-11	0.898
2.0309e-11	0.9082
2.8943e-11	0.898
4.1246e-11	0.7551
5.878e-11	0.8469
8.3768e-11	0.8469
1.1938e-10	0.898
1.7013e-10	0.8673
2.4245e-10	0.949
3.4551e-10	0.9184
4.9239e-10	0.8776
7.017e-10	0.9082
1e-09	0.8878
1.4251e-09	0.8469
2.0309e-09	0.8265
2.8943e-09	0.8367
4.1246e-09	0.6735
5.878e-09	0.6429
8.3768e-09	0.6122
1.1938e-08	0.2347
1.7013e-08	0.2449
2.4245e-08	0.1735
3.4551e-08	0.051
4.9239e-08	0.102
7.017e-08	0.1327
1e-07	0.1122
1.4251e-07	0.1224
2.0309e-07	0.0714
2.8943e-07	0.0714
4.1246e-07	0.102
5.878e-07	0.1224
8.3768e-07	0.0816
1.1938e-06	0.102
1.7013e-06	0.0612
2.4245e-06	0.102
3.4551e-06	0.0612
4.9239e-06	0.1224
7.017e-06	0.1122
1e-05	0.1429
1e-11	0.9082
1.4251e-11	0.8776
2.0309e-11	0.8571
2.8943e-11	0.8776
4.1246e-11	0.8163
5.878e-11	0.8878
8.3768e-11	0.8878
1.1938e-10	0.898
1.7013e-10	0.7857
2.4245e-10	0.8878
3.4551e-10	0.8469
4.9239e-10	0.898
7.017e-10	0.9082
1e-09	0.898
1.4251e-09	0.7653
2.0309e-09	0.8469
2.8943e-09	0.898
4.1246e-09	0.7143
5.878e-09	0.5408
8.3768e-09	0.4286
1.1938e-08	0.3469
1.7013e-08	0.2653
2.4245e-08	0.2551
3.4551e-08	0.0918
4.9239e-08	0.0918
7.017e-08	0.1837
1e-07	0.051
1.4251e-07	0.102
2.0309e-07	0.0918
2.8943e-07	0.1122
4.1246e-07	0.1224
5.878e-07	0.1429
8.3768e-07	0.0918
1.1938e-06	0.0714
1.7013e-06	0.0408
2.4245e-06	0.0612
3.4551e-06	0.1224
4.9239e-06	0.0918
7.017e-06	0.051
1e-05	0.1327
1e-11	0.8469
1.4251e-11	0.8776
2.0309e-11	0.8776
2.8943e-11	0.9286
4.1246e-11	0.8673
5.878e-11	0.8265
8.3768e-11	0.8367
1.1938e-10	0.8878
1.7013e-10	0.8776
2.4245e-10	0.8776
3.4551e-10	0.8571
4.9239e-10	0.9082
7.017e-10	0.8673
1e-09	0.8469
1.4251e-09	0.8571
2.0309e-09	0.8367
2.8943e-09	0.8061
4.1246e-09	0.7347
5.878e-09	0.5612
8.3768e-09	0.4592
1.1938e-08	0.2653
1.7013e-08	0.3163
2.4245e-08	0.1429
3.4551e-08	0.1735
4.9239e-08	0.102
7.017e-08	0.0816
1e-07	0.1735
1.4251e-07	0.0918
2.0309e-07	0.1122
2.8943e-07	0.1122
4.1246e-07	0.102
5.878e-07	0.0612
8.3768e-07	0.1531
1.1938e-06	0.0714
1.7013e-06	0.0408
2.4245e-06	0.1122
3.4551e-06	0.1122
4.9239e-06	0.0918
7.017e-06	0.1122
1e-05	0.1122
1e-11	0.8265
1.4251e-11	0.8265
2.0309e-11	0.8878
2.8943e-11	0.8571
4.1246e-11	0.8163
5.878e-11	0.8776
8.3768e-11	0.8673
1.1938e-10	0.9082
1.7013e-10	0.898
2.4245e-10	0.8878
3.4551e-10	0.8367
4.9239e-10	0.9082
7.017e-10	0.8163
1e-09	0.8878
1.4251e-09	0.8163
2.0309e-09	0.898
2.8943e-09	0.7653
4.1246e-09	0.7653
5.878e-09	0.6531
8.3768e-09	0.3673
1.1938e-08	0.2857
1.7013e-08	0.2041
2.4245e-08	0.1224
3.4551e-08	0.0918
4.9239e-08	0.1224
7.017e-08	0.102
1e-07	0.1633
1.4251e-07	0.0714
2.0309e-07	0.051
2.8943e-07	0.0714
4.1246e-07	0.102
5.878e-07	0.1224
8.3768e-07	0.1224
1.1938e-06	0.0918
1.7013e-06	0.0612
2.4245e-06	0.102
3.4551e-06	0.1224
4.9239e-06	0.102
7.017e-06	0.0918
1e-05	0.0714
1e-11	0.8878
1.4251e-11	0.8673
2.0309e-11	0.8265
2.8943e-11	0.8878
4.1246e-11	0.9286
5.878e-11	0.898
8.3768e-11	0.9388
1.1938e-10	0.8265
1.7013e-10	0.8878
2.4245e-10	0.898
3.4551e-10	0.8061
4.9239e-10	0.9388
7.017e-10	0.898
1e-09	0.8571
1.4251e-09	0.8367
2.0309e-09	0.8571
2.8943e-09	0.7653
4.1246e-09	0.6939
5.878e-09	0.551
8.3768e-09	0.449
1.1938e-08	0.3061
1.7013e-08	0.2755
2.4245e-08	0.3163
3.4551e-08	0.0714
4.9239e-08	0.1633
7.017e-08	0.1122
1e-07	0.0918
1.4251e-07	0.102
2.0309e-07	0.102
2.8943e-07	0.1327
4.1246e-07	0.0714
5.878e-07	0.0816
8.3768e-07	0.051
1.1938e-06	0.102
1.7013e-06	0.1224
2.4245e-06	0.0816
3.4551e-06	0.0408
4.9239e-06	0.1939
7.017e-06	0.0816
1e-05	0.051
1e-11	0.8776
1.4251e-11	0.8061
2.0309e-11	0.8061
2.8943e-11	0.8878
4.1246e-11	0.8673
5.878e-11	0.898
8.3768e-11	0.8367
1.1938e-10	0.8469
1.7013e-10	0.9286
2.4245e-10	0.8469
3.4551e-10	0.8469
4.9239e-10	0.9286
7.017e-10	0.8878
1e-09	0.9286
1.4251e-09	0.8469
2.0309e-09	0.8469
2.8943e-09	0.8163
4.1246e-09	0.6837
5.878e-09	0.6837
8.3768e-09	0.3469
1.1938e-08	0.3061
1.7013e-08	0.2245
2.4245e-08	0.2143
3.4551e-08	0.1429
4.9239e-08	0.1429
7.017e-08	0.102
1e-07	0.1837
1.4251e-07	0.0714
2.0309e-07	0.102
2.8943e-07	0.1531
4.1246e-07	0.102
5.878e-07	0.1224
8.3768e-07	0.0816
1.1938e-06	0.0612
1.7013e-06	0.0714
2.4245e-06	0.1122
3.4551e-06	0.0612
4.9239e-06	0.0816
7.017e-06	0.102
1e-05	0.0918
1e-11	0.8163
1.4251e-11	0.898
2.0309e-11	0.8265
2.8943e-11	0.8673
4.1246e-11	0.8571
5.878e-11	0.898
8.3768e-11	0.9286
1.1938e-10	0.8367
1.7013e-10	0.9184
2.4245e-10	0.898
3.4551e-10	0.8571
4.9239e-10	0.898
7.017e-10	0.9082
1e-09	0.8061
1.4251e-09	0.8571
2.0309e-09	0.8673
2.8943e-09	0.7857
4.1246e-09	0.7551
5.878e-09	0.5306
8.3768e-09	0.5102
1.1938e-08	0.2653
1.7013e-08	0.2449
2.4245e-08	0.2449
3.4551e-08	0.1429
4.9239e-08	0.1224
7.017e-08	0.0408
1e-07	0.0714
1.4251e-07	0.1327
2.0309e-07	0.0816
2.8943e-07	0.0714
4.1246e-07	0.102
5.878e-07	0.0408
8.3768e-07	0.051
1.1938e-06	0.0816
1.7013e-06	0.0918
2.4245e-06	0.102
3.4551e-06	0.0408
4.9239e-06	0.1122
7.017e-06	0.102
1e-05	0.1531
1e-11	0.9286
1.4251e-11	0.8265
2.0309e-11	0.8673
2.8943e-11	0.8776
4.1246e-11	0.9184
5.878e-11	0.7959
8.3768e-11	0.949
1.1938e-10	0.9286
1.7013e-10	0.7959
2.4245e-10	0.8163
3.4551e-10	0.9184
4.9239e-10	0.8878
7.017e-10	0.898
1e-09	0.9082
1.4251e-09	0.9082
2.0309e-09	0.8673
2.8943e-09	0.7653
4.1246e-09	0.7755
5.878e-09	0.6939
8.3768e-09	0.5714
1.1938e-08	0.3265
1.7013e-08	0.2041
2.4245e-08	0.0918
3.4551e-08	0.1633
4.9239e-08	0.1531
7.017e-08	0.1837
1e-07	0.0306
1.4251e-07	0.0714
2.0309e-07	0.0714
2.8943e-07	0.102
4.1246e-07	0.1122
5.878e-07	0.0918
8.3768e-07	0.1224
1.1938e-06	0.1122
1.7013e-06	0.1122
2.4245e-06	0.051
3.4551e-06	0.0918
4.9239e-06	0.0714
7.017e-06	0.1224
1e-05	0.1224
1e-11	0.8571
1.4251e-11	0.9082
2.0309e-11	0.9082
2.8943e-11	0.8061
4.1246e-11	0.9082
5.878e-11	0.8776
8.3768e-11	0.8367
1.1938e-10	0.8878
1.7013e-10	0.898
2.4245e-10	0.8776
3.4551e-10	0.8367
4.9239e-10	0.9082
7.017e-10	0.8367
1e-09	0.9082
1.4251e-09	0.9082
2.0309e-09	0.8571
2.8943e-09	0.7449
4.1246e-09	0.7755
5.878e-09	0.6633
8.3768e-09	0.5204
1.1938e-08	0.3673
1.7013e-08	0.2551
2.4245e-08	0.0816
3.4551e-08	0.0918
4.9239e-08	0.1327
7.017e-08	0.1224
1e-07	0.0918
1.4251e-07	0.102
2.0309e-07	0.1122
2.8943e-07	0.0918
4.1246e-07	0.0918
5.878e-07	0.0816
8.3768e-07	0.0612
1.1938e-06	0.051
1.7013e-06	0.1224
2.4245e-06	0.102
3.4551e-06	0.1122
4.9239e-06	0.1122
7.017e-06	0.1122
1e-05	0.0918
1e-11	0.7959
1.4251e-11	0.8673
2.0309e-11	0.8776
2.8943e-11	0.8571
4.1246e-11	0.8776
5.878e-11	0.8878
8.3768e-11	0.8878
1.1938e-10	0.898
1.7013e-10	0.9082
2.4245e-10	0.8776
3.4551e-10	0.8673
4.9239e-10	0.9082
7.017e-10	0.8776
1e-09	0.9286
1.4251e-09	0.8571
2.0309e-09	0.8776
2.8943e-09	0.7959
4.1246e-09	0.6939
5.878e-09	0.6122
8.3768e-09	0.5714
1.1938e-08	0.398
1.7013e-08	0.2347
2.4245e-08	0.1429
3.4551e-08	0.1735
4.9239e-08	0.1327
7.017e-08	0.0816
1e-07	0.1327
1.4251e-07	0.1122
2.0309e-07	0.0714
2.8943e-07	0.0306
4.1246e-07	0.0918
5.878e-07	0.0714
8.3768e-07	0.0612
1.1938e-06	0.1633
1.7013e-06	0.0714
2.4245e-06	0.1122
3.4551e-06	0.0816
4.9239e-06	0.1327
7.017e-06	0.0918
1e-05	0.0816
1e-11	0.8571
1.4251e-11	0.8571
2.0309e-11	0.8061
2.8943e-11	0.9694
4.1246e-11	0.8878
5.878e-11	0.9286
8.3768e-11	0.8878
1.1938e-10	0.8878
1.7013e-10	0.8878
2.4245e-10	0.8469
3.4551e-10	0.8061
4.9239e-10	0.8673
7.017e-10	0.898
1e-09	0.9184
1.4251e-09	0.8776
2.0309e-09	0.8469
2.8943e-09	0.7551
4.1246e-09	0.6939
5.878e-09	0.6939
8.3768e-09	0.5306
1.1938e-08	0.3061
1.7013e-08	0.2449
2.4245e-08	0.1224
3.4551e-08	0.0816
4.9239e-08	0.0918
7.017e-08	0.102
1e-07	0.0714
1.4251e-07	0.0816
2.0309e-07	0.102
2.8943e-07	0.051
4.1246e-07	0.1122
5.878e-07	0.0714
8.3768e-07	0.102
1.1938e-06	0.102
1.7013e-06	0.0918
2.4245e-06	0.0816
3.4551e-06	0.0918
4.9239e-06	0.051
7.017e-06	0.102
1e-05	0.0306
1e-11	0.8571
1.4251e-11	0.7755
2.0309e-11	0.949
2.8943e-11	0.8776
4.1246e-11	0.898
5.878e-11	0.8571
8.3768e-11	0.8878
1.1938e-10	0.8571
1.7013e-10	0.8673
2.4245e-10	0.9082
3.4551e-10	0.8571
4.9239e-10	0.8469
7.017e-10	0.9082
1e-09	0.8878
1.4251e-09	0.8673
2.0309e-09	0.7755
2.8943e-09	0.7857
4.1246e-09	0.6224
5.878e-09	0.6327
8.3768e-09	0.4796
1.1938e-08	0.3571
1.7013e-08	0.1327
2.4245e-08	0.1429
3.4551e-08	0.0816
4.9239e-08	0.1224
7.017e-08	0.0714
1e-07	0.102
1.4251e-07	0.0714
2.0309e-07	0.0714
2.8943e-07	0.0918
4.1246e-07	0.0612
5.878e-07	0.1224
8.3768e-07	0.0918
1.1938e-06	0.0816
1.7013e-06	0.1327
2.4245e-06	0.0714
3.4551e-06	0.0816
4.9239e-06	0.0612
7.017e-06	0.1429
1e-05	0.051
1e-11	0.9898
1.4251e-11	0.8265
2.0309e-11	0.8673
2.8943e-11	0.9184
4.1246e-11	0.9082
5.878e-11	0.8878
8.3768e-11	0.8571
1.1938e-10	0.8265
1.7013e-10	0.8571
2.4245e-10	0.9286
3.4551e-10	0.8878
4.9239e-10	0.9184
7.017e-10	0.9082
1e-09	0.8469
1.4251e-09	0.8878
2.0309e-09	0.8163
2.8943e-09	0.7653
4.1246e-09	0.7245
5.878e-09	0.6939
8.3768e-09	0.5408
1.1938e-08	0.2449
1.7013e-08	0.2653
2.4245e-08	0.1633
3.4551e-08	0.0816
4.9239e-08	0.102
7.017e-08	0.1531
1e-07	0.1531
1.4251e-07	0.0714
2.0309e-07	0.102
2.8943e-07	0.0918
4.1246e-07	0.1122
5.878e-07	0.1122
8.3768e-07	0.1327
1.1938e-06	0.102
1.7013e-06	0.102
2.4245e-06	0.102
3.4551e-06	0.0714
4.9239e-06	0.0816
7.017e-06	0.0612
1e-05	0.0714
1e-11	0.9388
1.4251e-11	0.898
2.0309e-11	0.8367
2.8943e-11	0.8673
4.1246e-11	0.8673
5.878e-11	0.9286
8.3768e-11	0.8265
1.1938e-10	0.898
1.7013e-10	0.8776
2.4245e-10	0.8571
3.4551e-10	0.8878
4.9239e-10	0.9286
7.017e-10	0.8776
1e-09	0.8265
1.4251e-09	0.8061
2.0309e-09	0.9082
2.8943e-09	0.7959
4.1246e-09	0.7041
5.878e-09	0.6837
8.3768e-09	0.5612
1.1938e-08	0.2347
1.7013e-08	0.1837
2.4245e-08	0.1531
3.4551e-08	0.2245
4.9239e-08	0.1327
7.017e-08	0.1429
1e-07	0.1224
1.4251e-07	0.051
2.0309e-07	0.1122
2.8943e-07	0.0816
4.1246e-07	0.102
5.878e-07	0.1327
8.3768e-07	0.1327
1.1938e-06	0.0612
1.7013e-06	0.1327
2.4245e-06	0.0918
3.4551e-06	0.0714
4.9239e-06	0.0918
7.017e-06	0.0918
1e-05	0.1327
1e-11	0.8673
1.4251e-11	0.9082
2.0309e-11	0.8367
2.8943e-11	0.898
4.1246e-11	0.9082
5.878e-11	0.9694
8.3768e-11	0.9082
1.1938e-10	0.898
1.7013e-10	0.8776
2.4245e-10	0.8469
3.4551e-10	0.898
4.9239e-10	0.8367
7.017e-10	0.898
1e-09	0.8571
1.4251e-09	0.8163
2.0309e-09	0.8878
2.8943e-09	0.8469
4.1246e-09	0.7755
5.878e-09	0.602
8.3768e-09	0.5
1.1938e-08	0.3571
1.7013e-08	0.1531
2.4245e-08	0.102
3.4551e-08	0.1327
4.9239e-08	0.0816
7.017e-08	0.0714
1e-07	0.1224
1.4251e-07	0.102
2.0309e-07	0.0918
2.8943e-07	0.1224
4.1246e-07	0.0612
5.878e-07	0.1122
8.3768e-07	0.0612
1.1938e-06	0.0816
1.7013e-06	0.0612
2.4245e-06	0.1224
3.4551e-06	0.102
4.9239e-06	0.102
7.017e-06	0.1122
1e-05	0.0408
1e-11	0.8163
1.4251e-11	0.8776
2.0309e-11	0.9184
2.8943e-11	0.8367
4.1246e-11	0.9082
5.878e-11	0.9184
8.3768e-11	0.8367
1.1938e-10	0.9184
1.7013e-10	0.8265
2.4245e-10	0.8469
3.4551e-10	0.8367
4.9239e-10	0.8878
7.017e-10	0.8367
1e-09	0.8469
1.4251e-09	0.8571
2.0309e-09	0.8265
2.8943e-09	0.7347
4.1246e-09	0.7143
5.878e-09	0.6327
8.3768e-09	0.449
1.1938e-08	0.3776
1.7013e-08	0.1429
2.4245e-08	0.1633
3.4551e-08	0.0306
4.9239e-08	0.0612
7.017e-08	0.0714
1e-07	0.0816
1.4251e-07	0.0714
2.0309e-07	0.102
2.8943e-07	0.0918
4.1246e-07	0.0918
5.878e-07	0.0714
8.3768e-07	0.0612
1.1938e-06	0.0714
1.7013e-06	0.102
2.4245e-06	0.1224
3.4551e-06	0.102
4.9239e-06	0.051
7.017e-06	0.0612
1e-05	0.0408
1e-11	0.9184
1.4251e-11	0.8878
2.0309e-11	0.8571
2.8943e-11	0.9592
4.1246e-11	0.9592
5.878e-11	0.9388
8.3768e-11	0.898
1.1938e-10	0.8571
1.7013e-10	0.949
2.4245e-10	0.8571
3.4551e-10	0.8571
4.9239e-10	0.898
7.017e-10	0.898
1e-09	0.8469
1.4251e-09	0.7857
2.0309e-09	0.7755
2.8943e-09	0.7755
4.1246e-09	0.7551
5.878e-09	0.6429
8.3768e-09	0.4592
1.1938e-08	0.3367
1.7013e-08	0.1837
2.4245e-08	0.0918
3.4551e-08	0.0408
4.9239e-08	0.0408
7.017e-08	0.102
1e-07	0.1122
1.4251e-07	0.1122
2.0309e-07	0.1327
2.8943e-07	0.1429
4.1246e-07	0.0306
5.878e-07	0.0918
8.3768e-07	0.1735
1.1938e-06	0.102
1.7013e-06	0.0612
2.4245e-06	0.102
3.4551e-06	0.1122
4.9239e-06	0.0816
7.017e-06	0.051
1e-05	0.051
1e-11	0.9082
1.4251e-11	0.8163
2.0309e-11	0.8571
2.8943e-11	0.898
4.1246e-11	0.8878
5.878e-11	0.8571
8.3768e-11	0.9184
1.1938e-10	0.9184
1.7013e-10	0.8673
2.4245e-10	0.9082
3.4551e-10	0.8163
4.9239e-10	0.8673
7.017e-10	0.8571
1e-09	0.8571
1.4251e-09	0.8673
2.0309e-09	0.8776
2.8943e-09	0.7755
4.1246e-09	0.7347
5.878e-09	0.6531
8.3768e-09	0.5102
1.1938e-08	0.3878
1.7013e-08	0.2551
2.4245e-08	0.0918
3.4551e-08	0.1327
4.9239e-08	0.1633
7.017e-08	0.1224
1e-07	0.0612
1.4251e-07	0.0816
2.0309e-07	0.0714
2.8943e-07	0.0408
4.1246e-07	0.051
5.878e-07	0.0612
8.3768e-07	0.1122
1.1938e-06	0.0918
1.7013e-06	0.0714
2.4245e-06	0.0714
3.4551e-06	0.0918
4.9239e-06	0.0306
7.017e-06	0.0714
1e-05	0.0612
1e-11	0.8878
1.4251e-11	0.8673
2.0309e-11	0.9286
2.8943e-11	0.8061
4.1246e-11	0.9388
5.878e-11	0.898
8.3768e-11	0.8776
1.1938e-10	0.8571
1.7013e-10	0.9082
2.4245e-10	0.898
3.4551e-10	0.8776
4.9239e-10	0.9184
7.017e-10	0.8878
1e-09	0.8776
1.4251e-09	0.8061
2.0309e-09	0.8265
2.8943e-09	0.8163
4.1246e-09	0.8163
5.878e-09	0.6939
8.3768e-09	0.6633
1.1938e-08	0.2959
1.7013e-08	0.2551
2.4245e-08	0.1122
3.4551e-08	0.102
4.9239e-08	0.0714
7.017e-08	0.0408
1e-07	0.1327
1.4251e-07	0.0714
2.0309e-07	0.0918
2.8943e-07	0.0918
4.1246e-07	0.1122
5.878e-07	0.0918
8.3768e-07	0.1429
1.1938e-06	0.1327
1.7013e-06	0.0714
2.4245e-06	0.102
3.4551e-06	0.1327
4.9239e-06	0.0918
7.017e-06	0.0612
1e-05	0.0816
1e-11	0.8673
1.4251e-11	0.9286
2.0309e-11	0.8673
2.8943e-11	0.8571
4.1246e-11	0.9184
5.878e-11	0.7959
8.3768e-11	0.8673
1.1938e-10	0.8571
1.7013e-10	0.8571
2.4245e-10	0.8776
3.4551e-10	0.8265
4.9239e-10	0.9082
7.017e-10	0.8163
1e-09	0.8878
1.4251e-09	0.898
2.0309e-09	0.7959
2.8943e-09	0.7449
4.1246e-09	0.7755
5.878e-09	0.6429
8.3768e-09	0.4184
1.1938e-08	0.4184
1.7013e-08	0.2245
2.4245e-08	0.1531
3.4551e-08	0.1531
4.9239e-08	0.1429
7.017e-08	0.0918
1e-07	0.1122
1.4251e-07	0.1224
2.0309e-07	0.0408
2.8943e-07	0.0816
4.1246e-07	0.1224
5.878e-07	0.0816
8.3768e-07	0.0612
1.1938e-06	0.1327
1.7013e-06	0.0714
2.4245e-06	0.102
3.4551e-06	0.102
4.9239e-06	0.1122
7.017e-06	0.0612
1e-05	0.0816
1e-11	0.898
1.4251e-11	0.8469
2.0309e-11	0.8367
2.8943e-11	0.8776
4.1246e-11	0.9184
5.878e-11	0.8878
8.3768e-11	0.9082
1.1938e-10	0.8163
1.7013e-10	0.8571
2.4245e-10	0.898
3.4551e-10	0.9082
4.9239e-10	0.9592
7.017e-10	0.898
1e-09	0.8878
1.4251e-09	0.898
2.0309e-09	0.8673
2.8943e-09	0.9082
4.1246e-09	0.7653
5.878e-09	0.6939
8.3768e-09	0.5204
1.1938e-08	0.3163
1.7013e-08	0.2449
2.4245e-08	0.1531
3.4551e-08	0.1327
4.9239e-08	0.1224
7.017e-08	0.0918
1e-07	0.1122
1.4251e-07	0.1429
2.0309e-07	0.1224
2.8943e-07	0.1327
4.1246e-07	0.102
5.878e-07	0.102
8.3768e-07	0.0204
1.1938e-06	0.0918
1.7013e-06	0.0714
2.4245e-06	0.0918
3.4551e-06	0.1327
4.9239e-06	0.0918
7.017e-06	0.0816
1e-05	0.1122
1e-11	0.7959
1.4251e-11	0.8776
2.0309e-11	0.8776
2.8943e-11	0.8163
4.1246e-11	0.9184
5.878e-11	0.8878
8.3768e-11	0.8776
1.1938e-10	0.9592
1.7013e-10	0.9388
2.4245e-10	0.8367
3.4551e-10	0.8673
4.9239e-10	0.9286
7.017e-10	0.8776
1e-09	0.8673
1.4251e-09	0.8367
2.0309e-09	0.8571
2.8943e-09	0.7551
4.1246e-09	0.7755
5.878e-09	0.6633
8.3768e-09	0.6224
1.1938e-08	0.2857
1.7013e-08	0.1531
2.4245e-08	0.1939
3.4551e-08	0.1429
4.9239e-08	0.1327
7.017e-08	0.102
1e-07	0.0918
1.4251e-07	0.2041
2.0309e-07	0.1224
2.8943e-07	0.1633
4.1246e-07	0.102
5.878e-07	0.1633
8.3768e-07	0.0816
1.1938e-06	0.0714
1.7013e-06	0.0612
2.4245e-06	0.0816
3.4551e-06	0.1122
4.9239e-06	0.0408
7.017e-06	0.0918
1e-05	0.0816
1e-11	0.8469
1.4251e-11	0.9796
2.0309e-11	0.8673
2.8943e-11	0.8673
4.1246e-11	0.8878
5.878e-11	0.8571
8.3768e-11	0.9082
1.1938e-10	0.9184
1.7013e-10	0.898
2.4245e-10	0.8469
3.4551e-10	0.7857
4.9239e-10	0.8878
7.017e-10	0.949
1e-09	0.8776
1.4251e-09	0.9694
2.0309e-09	0.8367
2.8943e-09	0.8673
4.1246e-09	0.6939
5.878e-09	0.5306
8.3768e-09	0.4592
1.1938e-08	0.3367
1.7013e-08	0.2245
2.4245e-08	0.1837
3.4551e-08	0.1122
4.9239e-08	0.1122
7.017e-08	0.102
1e-07	0.1429
1.4251e-07	0.1531
2.0309e-07	0.0408
2.8943e-07	0.0816
4.1246e-07	0.0714
5.878e-07	0.1327
8.3768e-07	0.0612
1.1938e-06	0.102
1.7013e-06	0.0816
2.4245e-06	0.0816
3.4551e-06	0.051
4.9239e-06	0.0612
7.017e-06	0.102
1e-05	0.051

## Sheet: Data2_regularly_spaced_BO
Square			Triangular			Hexagonal			Control
kD_catenator	Binding Occupancy	stdev of Binding Occupancy	kD_catenator	Binding Occupancy	stdev of Binding Occupancy	kD_catenator	Binding Occupancy	stdev of Binding Occupancy	kD_catenator	Binding Occupancy
1e-11	0.8027	0.0466	1e-11	0.8878	0.0364	1e-11	0.8767	0.0398	1e-11	0.1
1.4251e-11	0.8007	0.0476	1.4251e-11	0.8881	0.0366	1.4251e-11	0.877	0.0386	2.5642e-07	0.1
2.0309e-11	0.8017	0.0479	2.0309e-11	0.8884	0.0363	2.0309e-11	0.8767	0.0396	5.1283e-07	0.1
2.8943e-11	0.8025	0.0454	2.8943e-11	0.888	0.0363	2.8943e-11	0.876	0.0403	7.6924e-07	0.1
4.1246e-11	0.8016	0.0472	4.1246e-11	0.8883	0.0358	4.1246e-11	0.8771	0.04	1.0256e-06	0.1
5.878e-11	0.8019	0.0474	5.878e-11	0.8901	0.0364	5.878e-11	0.8782	0.0393	1.2821e-06	0.1
8.3768e-11	0.8014	0.0478	8.3768e-11	0.8913	0.0357	8.3768e-11	0.8782	0.0389	1.5385e-06	0.1
1.1938e-10	0.8023	0.0476	1.1938e-10	0.8924	0.0357	1.1938e-10	0.8781	0.0389	1.7949e-06	0.1
1.7013e-10	0.7999	0.0477	1.7013e-10	0.8934	0.0346	1.7013e-10	0.8802	0.0385	2.0513e-06	0.1
2.4245e-10	0.7993	0.0478	2.4245e-10	0.8967	0.0337	2.4245e-10	0.8803	0.0391	2.3077e-06	0.1
3.4551e-10	0.7977	0.048	3.4551e-10	0.8985	0.0336	3.4551e-10	0.8803	0.0387	2.5641e-06	0.1
4.9239e-10	0.7935	0.0493	4.9239e-10	0.9023	0.0328	4.9239e-10	0.8797	0.0389	2.8205e-06	0.1
7.017e-10	0.7872	0.0511	7.017e-10	0.903	0.0326	7.017e-10	0.8763	0.0394	3.0769e-06	0.1
1e-09	0.7757	0.0535	1e-09	0.9023	0.0324	1e-09	0.8716	0.0395	3.3333e-06	0.1
1.4251e-09	0.7592	0.0553	1.4251e-09	0.895	0.0333	1.4251e-09	0.8583	0.0425	3.5897e-06	0.1
2.0309e-09	0.7282	0.0584	2.0309e-09	0.8791	0.0357	2.0309e-09	0.8329	0.0448	3.8462e-06	0.1
2.8943e-09	0.6774	0.0639	2.8943e-09	0.8518	0.0399	2.8943e-09	0.7896	0.0506	4.1026e-06	0.1
4.1246e-09	0.6009	0.0711	4.1246e-09	0.8077	0.0453	4.1246e-09	0.7228	0.0584	4.359e-06	0.1
5.878e-09	0.4937	0.0777	5.878e-09	0.7413	0.0526	5.878e-09	0.6186	0.0678	4.6154e-06	0.1
8.3768e-09	0.3627	0.0778	8.3768e-09	0.6448	0.0619	8.3768e-09	0.4787	0.0744	4.8718e-06	0.1
1.1938e-08	0.2508	0.0655	1.1938e-08	0.5129	0.0722	1.1938e-08	0.3268	0.0724	5.1282e-06	0.1
1.7013e-08	0.1817	0.0538	1.7013e-08	0.3602	0.074	1.7013e-08	0.2185	0.0599	5.3846e-06	0.1
2.4245e-08	0.1428	0.045	2.4245e-08	0.2396	0.0625	2.4245e-08	0.1604	0.0487	5.641e-06	0.1
3.4551e-08	0.1229	0.039	3.4551e-08	0.1719	0.0511	3.4551e-08	0.1328	0.0409	5.8974e-06	0.1
4.9239e-08	0.1105	0.035	4.9239e-08	0.1369	0.0429	4.9239e-08	0.1168	0.0367	6.1538e-06	0.1
7.017e-08	0.1039	0.0331	7.017e-08	0.1193	0.0373	7.017e-08	0.1073	0.0344	6.4103e-06	0.1
1e-07	0.1005	0.0314	1e-07	0.1088	0.0344	1e-07	0.1013	0.0318	6.6667e-06	0.1
1.4251e-07	0.0973	0.0308	1.4251e-07	0.1033	0.0326	1.4251e-07	0.0984	0.0318	6.9231e-06	0.1
2.0309e-07	0.0956	0.0304	2.0309e-07	0.099	0.0316	2.0309e-07	0.0964	0.0306	7.1795e-06	0.1
2.8943e-07	0.0942	0.0302	2.8943e-07	0.0967	0.0315	2.8943e-07	0.0942	0.0301	7.4359e-06	0.1
4.1246e-07	0.0931	0.0296	4.1246e-07	0.0944	0.0295	4.1246e-07	0.0931	0.0298	7.6923e-06	0.1
5.878e-07	0.0914	0.0297	5.878e-07	0.0936	0.03	5.878e-07	0.0928	0.0292	7.9487e-06	0.1
8.3768e-07	0.0922	0.0294	8.3768e-07	0.0925	0.0291	8.3768e-07	0.092	0.0289	8.2051e-06	0.1
1.1938e-06	0.0912	0.0289	1.1938e-06	0.0918	0.0294	1.1938e-06	0.091	0.0288	8.4615e-06	0.1
1.7013e-06	0.0914	0.029	1.7013e-06	0.0916	0.029	1.7013e-06	0.0916	0.0294	8.718e-06	0.1
2.4245e-06	0.0907	0.0289	2.4245e-06	0.0909	0.0288	2.4245e-06	0.0911	0.0292	8.9744e-06	0.1
3.4551e-06	0.0904	0.0289	3.4551e-06	0.091	0.0287	3.4551e-06	0.0912	0.0292	9.2308e-06	0.1
4.9239e-06	0.0913	0.0291	4.9239e-06	0.0905	0.029	4.9239e-06	0.0911	0.0289	9.4872e-06	0.1
7.017e-06	0.0912	0.0289	7.017e-06	0.0918	0.0289	7.017e-06	0.0914	0.0289	9.7436e-06	0.1
1e-05	0.0907	0.0288	1e-05	0.0909	0.029	1e-05	0.0914	0.0296	1e-05	0.1

## Sheet: Data2_regularly_spaced_kDeff
Square			Triangular			Hexagonal			Control
kD_catenator	kD_eff	stdev of kD_eff	kD_catenator	kD_eff	stdev of kD_eff	kD_catenator	kD_eff	stdev of kD_eff	kD_catenator	kD_eff
1e-11	2.4586e-10	7.2371e-11	1e-11	1.2637e-10	4.616e-11	1e-11	1.4068e-10	5.1775e-11	1e-11	1e-08
1.4251e-11	2.4885e-10	7.4315e-11	1.4251e-11	1.2603e-10	4.6378e-11	1.4251e-11	1.4024e-10	5.0215e-11	2.5642e-07	1e-08
2.0309e-11	2.4735e-10	7.4547e-11	2.0309e-11	1.2565e-10	4.6027e-11	2.0309e-11	1.4067e-10	5.1489e-11	5.1283e-07	1e-08
2.8943e-11	2.4618e-10	7.0487e-11	2.8943e-11	1.2608e-10	4.6029e-11	2.8943e-11	1.4153e-10	5.2541e-11	7.6924e-07	1e-08
4.1246e-11	2.4748e-10	7.3448e-11	4.1246e-11	1.2576e-10	4.5388e-11	4.1246e-11	1.4011e-10	5.2051e-11	1.0256e-06	1e-08
5.878e-11	2.4702e-10	7.3744e-11	5.878e-11	1.235e-10	4.5914e-11	5.878e-11	1.387e-10	5.1011e-11	1.2821e-06	1e-08
8.3768e-11	2.4777e-10	7.4404e-11	8.3768e-11	1.2202e-10	4.4906e-11	8.3768e-11	1.3866e-10	5.0487e-11	1.5385e-06	1e-08
1.1938e-10	2.4644e-10	7.3957e-11	1.1938e-10	1.2058e-10	4.4877e-11	1.1938e-10	1.3885e-10	5.04e-11	1.7949e-06	1e-08
1.7013e-10	2.5016e-10	7.4544e-11	1.7013e-10	1.1926e-10	4.333e-11	1.7013e-10	1.3615e-10	4.9714e-11	2.0513e-06	1e-08
2.4245e-10	2.5114e-10	7.4864e-11	2.4245e-10	1.1519e-10	4.1881e-11	2.4245e-10	1.3602e-10	5.0516e-11	2.3077e-06	1e-08
3.4551e-10	2.5359e-10	7.5499e-11	3.4551e-10	1.1292e-10	4.1658e-11	3.4551e-10	1.3599e-10	4.9932e-11	2.5641e-06	1e-08
4.9239e-10	2.6024e-10	7.8289e-11	4.9239e-10	1.0824e-10	4.0226e-11	4.9239e-10	1.3681e-10	5.0314e-11	2.8205e-06	1e-08
7.017e-10	2.7026e-10	8.2416e-11	7.017e-10	1.074e-10	3.9956e-11	7.017e-10	1.4111e-10	5.1247e-11	3.0769e-06	1e-08
1e-09	2.8912e-10	8.8951e-11	1e-09	1.0823e-10	3.9768e-11	1e-09	1.4727e-10	5.1962e-11	3.3333e-06	1e-08
1.4251e-09	3.1726e-10	9.5946e-11	1.4251e-09	1.1728e-10	4.1629e-11	1.4251e-09	1.6513e-10	5.7671e-11	3.5897e-06	1e-08
2.0309e-09	3.7333e-10	1.1007e-10	2.0309e-09	1.3747e-10	4.6227e-11	2.0309e-09	2.0068e-10	6.4595e-11	3.8462e-06	1e-08
2.8943e-09	4.7624e-10	1.3921e-10	2.8943e-09	1.74e-10	5.502e-11	2.8943e-09	2.6644e-10	8.1157e-11	4.1026e-06	1e-08
4.1246e-09	6.6425e-10	1.9693e-10	4.1246e-09	2.3812e-10	6.9506e-11	4.1246e-09	3.8357e-10	1.1172e-10	4.359e-06	1e-08
5.878e-09	1.0256e-09	3.186e-10	5.878e-09	3.4895e-10	9.5789e-11	5.878e-09	6.1667e-10	1.7721e-10	4.6154e-06	1e-08
8.3768e-09	1.7569e-09	5.9124e-10	8.3768e-09	5.5087e-10	1.4883e-10	8.3768e-09	1.0892e-09	3.2473e-10	4.8718e-06	1e-08
1.1938e-08	2.9872e-09	1.0409e-09	1.1938e-08	9.4983e-10	2.7461e-10	1.1938e-08	2.06e-09	6.7812e-10	5.1282e-06	1e-08
1.7013e-08	4.5047e-09	1.6309e-09	1.7013e-08	1.7763e-09	5.7038e-10	1.7013e-08	3.5756e-09	1.2538e-09	5.3846e-06	1e-08
2.4245e-08	6.0024e-09	2.2047e-09	2.4245e-08	3.1734e-09	1.0887e-09	2.4245e-08	5.2353e-09	1.8939e-09	5.641e-06	1e-08
3.4551e-08	7.1359e-09	2.5791e-09	3.4551e-08	4.8183e-09	1.7298e-09	3.4551e-08	6.5314e-09	2.3185e-09	5.8974e-06	1e-08
4.9239e-08	8.0538e-09	2.8668e-09	4.9239e-08	6.3036e-09	2.2907e-09	4.9239e-08	7.5652e-09	2.6926e-09	6.1538e-06	1e-08
7.017e-08	8.6289e-09	3.0721e-09	7.017e-08	7.3852e-09	2.6257e-09	7.017e-08	8.3223e-09	2.9887e-09	6.4103e-06	1e-08
1e-07	8.9526e-09	3.1146e-09	1e-07	8.1879e-09	2.8998e-09	1e-07	8.8704e-09	3.0973e-09	6.6667e-06	1e-08
1.4251e-07	9.2812e-09	3.2558e-09	1.4251e-07	8.6841e-09	3.0595e-09	1.4251e-07	9.1651e-09	3.2899e-09	6.9231e-06	1e-08
2.0309e-07	9.4585e-09	3.3231e-09	2.0309e-07	9.0981e-09	3.2201e-09	2.0309e-07	9.371e-09	3.2896e-09	7.1795e-06	1e-08
2.8943e-07	9.6156e-09	3.3996e-09	2.8943e-07	9.34e-09	3.3662e-09	2.8943e-07	9.6131e-09	3.3913e-09	7.4359e-06	1e-08
4.1246e-07	9.7435e-09	3.4158e-09	4.1246e-07	9.5971e-09	3.3137e-09	4.1246e-07	9.7371e-09	3.4361e-09	7.6923e-06	1e-08
5.878e-07	9.9465e-09	3.5551e-09	5.878e-07	9.6871e-09	3.4312e-09	5.878e-07	9.7755e-09	3.3852e-09	7.9487e-06	1e-08
8.3768e-07	9.8506e-09	3.4582e-09	8.3768e-07	9.8123e-09	3.4042e-09	8.3768e-07	9.8656e-09	3.4174e-09	8.2051e-06	1e-08
1.1938e-06	9.9656e-09	3.4791e-09	1.1938e-06	9.8948e-09	3.4893e-09	1.1938e-06	9.9933e-09	3.4829e-09	8.4615e-06	1e-08
1.7013e-06	9.9411e-09	3.4765e-09	1.7013e-06	9.917e-09	3.4601e-09	1.7013e-06	9.9123e-09	3.4992e-09	8.718e-06	1e-08
2.4245e-06	1.003e-08	3.5166e-09	2.4245e-06	1.0001e-08	3.4897e-09	2.4245e-06	9.9752e-09	3.5181e-09	8.9744e-06	1e-08
3.4551e-06	1.0063e-08	3.5325e-09	3.4551e-06	9.9845e-09	3.4632e-09	3.4551e-06	9.9665e-09	3.5145e-09	9.2308e-06	1e-08
4.9239e-06	9.9546e-09	3.4879e-09	4.9239e-06	1.005e-08	3.5351e-09	4.9239e-06	9.9743e-09	3.485e-09	9.4872e-06	1e-08
7.017e-06	9.9638e-09	3.4715e-09	7.017e-06	9.8907e-09	3.4257e-09	7.017e-06	9.9364e-09	3.4527e-09	9.7436e-06	1e-08
1e-05	1.0021e-08	3.497e-09	1e-05	1.0005e-08	3.5085e-09	1e-05	9.9358e-09	3.5394e-09	1e-05	1e-08

## Sheet: Data3_Irregularly_spaced_BO
p=1.47 per 7 x 7 nm2			p= 2.94			p= 4.41			p= 8.82			p= 11.76			Control
kD_catenator	Binding Occupancy	stdev of Binding Occupancy	kD_catenator	Binding Occupancy	stdev of Binding Occupancy	kD_catenator	Binding Occupancy	stdev of Binding Occupancy	kD_catenator	Binding Occupancy	stdev of Binding Occupancy	kD_catenator	Binding Occupancy	stdev of Binding Occupancy	kD_catenator	Binding Occupancy
1e-11	0.5982	0.1009	1e-11	0.8991	0.0596	1e-11	0.9373	0.0456	1e-11	0.9673	0.0344	1e-11	0.9736	0.0324	1e-11	0.1
1.4251e-11	0.5955	0.1004	1.4251e-11	0.8995	0.0589	1.4251e-11	0.9367	0.0451	1.4251e-11	0.9673	0.0343	1.4251e-11	0.9745	0.0321	2.5642e-07	0.1
2.0309e-11	0.5973	0.1013	2.0309e-11	0.8986	0.0594	2.0309e-11	0.938	0.0458	2.0309e-11	0.9683	0.0338	2.0309e-11	0.9757	0.0308	5.1283e-07	0.1
2.8943e-11	0.5912	0.1012	2.8943e-11	0.9	0.06	2.8943e-11	0.939	0.0454	2.8943e-11	0.9704	0.0329	2.8943e-11	0.9751	0.0316	7.6924e-07	0.1
4.1246e-11	0.5853	0.1052	4.1246e-11	0.9001	0.0587	4.1246e-11	0.9389	0.0458	4.1246e-11	0.9704	0.0329	4.1246e-11	0.977	0.0303	1.0256e-06	0.1
5.878e-11	0.5846	0.1043	5.878e-11	0.8987	0.0599	5.878e-11	0.9409	0.0457	5.878e-11	0.9721	0.0316	5.878e-11	0.9769	0.03	1.2821e-06	0.1
8.3768e-11	0.5811	0.1033	8.3768e-11	0.8985	0.0593	8.3768e-11	0.9424	0.0436	8.3768e-11	0.973	0.0324	8.3768e-11	0.9787	0.0293	1.5385e-06	0.1
1.1938e-10	0.5683	0.1035	1.1938e-10	0.8958	0.0595	1.1938e-10	0.9457	0.0439	1.1938e-10	0.9748	0.0311	1.1938e-10	0.9792	0.029	1.7949e-06	0.1
1.7013e-10	0.5562	0.1056	1.7013e-10	0.8957	0.061	1.7013e-10	0.9468	0.0432	1.7013e-10	0.9767	0.0302	1.7013e-10	0.9804	0.0275	2.0513e-06	0.1
2.4245e-10	0.5452	0.1074	2.4245e-10	0.8913	0.0597	2.4245e-10	0.9498	0.042	2.4245e-10	0.9779	0.0286	2.4245e-10	0.9827	0.0259	2.3077e-06	0.1
3.4551e-10	0.5247	0.1109	3.4551e-10	0.8894	0.0612	3.4551e-10	0.9529	0.0406	3.4551e-10	0.9803	0.0272	3.4551e-10	0.985	0.0232	2.5641e-06	0.1
4.9239e-10	0.5039	0.1083	4.9239e-10	0.8826	0.0629	4.9239e-10	0.9552	0.0387	4.9239e-10	0.9822	0.0257	4.9239e-10	0.9868	0.0217	2.8205e-06	0.1
7.017e-10	0.4792	0.1127	7.017e-10	0.8763	0.0639	7.017e-10	0.9578	0.0388	7.017e-10	0.9839	0.0241	7.017e-10	0.9883	0.0202	3.0769e-06	0.1
1e-09	0.4488	0.1143	1e-09	0.8637	0.0677	1e-09	0.9579	0.0377	1e-09	0.9864	0.0214	1e-09	0.9896	0.0188	3.3333e-06	0.1
1.4251e-09	0.4174	0.1122	1.4251e-09	0.8503	0.0696	1.4251e-09	0.957	0.0383	1.4251e-09	0.9864	0.0216	1.4251e-09	0.9904	0.0179	3.5897e-06	0.1
2.0309e-09	0.3773	0.1138	2.0309e-09	0.8279	0.075	2.0309e-09	0.9519	0.0403	2.0309e-09	0.9858	0.0218	2.0309e-09	0.9897	0.0181	3.8462e-06	0.1
2.8943e-09	0.3321	0.1106	2.8943e-09	0.8013	0.0809	2.8943e-09	0.943	0.0443	2.8943e-09	0.9829	0.0233	2.8943e-09	0.9878	0.0198	4.1026e-06	0.1
4.1246e-09	0.2884	0.1066	4.1246e-09	0.761	0.0895	4.1246e-09	0.9271	0.0493	4.1246e-09	0.979	0.0263	4.1246e-09	0.9848	0.0226	4.359e-06	0.1
5.878e-09	0.2453	0.1013	5.878e-09	0.7094	0.0992	5.878e-09	0.9062	0.057	5.878e-09	0.9708	0.0306	5.878e-09	0.98	0.0256	4.6154e-06	0.1
8.3768e-09	0.2109	0.0939	8.3768e-09	0.6408	0.1113	8.3768e-09	0.871	0.0676	8.3768e-09	0.961	0.0354	8.3768e-09	0.9716	0.0304	4.8718e-06	0.1
1.1938e-08	0.1765	0.0866	1.1938e-08	0.5477	0.1234	1.1938e-08	0.8223	0.081	1.1938e-08	0.9439	0.0427	1.1938e-08	0.9601	0.0372	5.1282e-06	0.1
1.7013e-08	0.1511	0.0795	1.7013e-08	0.4414	0.1282	1.7013e-08	0.7518	0.0947	1.7013e-08	0.9211	0.0512	1.7013e-08	0.9438	0.0429	5.3846e-06	0.1
2.4245e-08	0.1308	0.0712	2.4245e-08	0.3339	0.1239	2.4245e-08	0.6487	0.1126	2.4245e-08	0.8887	0.0607	2.4245e-08	0.9209	0.052	5.641e-06	0.1
3.4551e-08	0.1195	0.0664	3.4551e-08	0.2507	0.11	3.4551e-08	0.5214	0.1253	3.4551e-08	0.8404	0.0747	3.4551e-08	0.8882	0.0612	5.8974e-06	0.1
4.9239e-08	0.1126	0.062	4.9239e-08	0.1883	0.0931	4.9239e-08	0.3792	0.1286	4.9239e-08	0.7737	0.0892	4.9239e-08	0.8397	0.0727	6.1538e-06	0.1
7.017e-08	0.1024	0.0586	7.017e-08	0.1497	0.0799	7.017e-08	0.2685	0.1175	7.017e-08	0.6793	0.1042	7.017e-08	0.7768	0.0894	6.4103e-06	0.1
1e-07	0.1	0.0567	1e-07	0.1306	0.0725	1e-07	0.1942	0.0975	1e-07	0.5559	0.124	1e-07	0.6862	0.1046	6.6667e-06	0.1
1.4251e-07	0.0971	0.0549	1.4251e-07	0.1144	0.0644	1.4251e-07	0.1487	0.0799	1.4251e-07	0.4055	0.1321	1.4251e-07	0.5639	0.1171	6.9231e-06	0.1
2.0309e-07	0.0948	0.0547	2.0309e-07	0.1084	0.0616	2.0309e-07	0.1277	0.0708	2.0309e-07	0.2742	0.1183	2.0309e-07	0.4162	0.1298	7.1795e-06	0.1
2.8943e-07	0.0944	0.0542	2.8943e-07	0.1012	0.0583	2.8943e-07	0.1142	0.065	2.8943e-07	0.19	0.0983	2.8943e-07	0.281	0.1221	7.4359e-06	0.1
4.1246e-07	0.0935	0.0548	4.1246e-07	0.0996	0.0561	4.1246e-07	0.1052	0.0609	4.1246e-07	0.1489	0.0804	4.1246e-07	0.1937	0.1	7.6923e-06	0.1
5.878e-07	0.0914	0.0529	5.878e-07	0.0953	0.0555	5.878e-07	0.1008	0.0579	5.878e-07	0.1259	0.0706	5.878e-07	0.1457	0.0798	7.9487e-06	0.1
8.3768e-07	0.0913	0.0533	8.3768e-07	0.0945	0.0546	8.3768e-07	0.0986	0.0565	8.3768e-07	0.1115	0.0636	8.3768e-07	0.1267	0.0722	8.2051e-06	0.1
1.1938e-06	0.0919	0.0529	1.1938e-06	0.0936	0.0548	1.1938e-06	0.0965	0.0557	1.1938e-06	0.1048	0.0602	1.1938e-06	0.1118	0.0647	8.4615e-06	0.1
1.7013e-06	0.0915	0.0532	1.7013e-06	0.0936	0.0526	1.7013e-06	0.0954	0.0541	1.7013e-06	0.1011	0.0579	1.7013e-06	0.1058	0.0607	8.718e-06	0.1
2.4245e-06	0.0903	0.0533	2.4245e-06	0.0905	0.0528	2.4245e-06	0.0926	0.0535	2.4245e-06	0.099	0.0557	2.4245e-06	0.1006	0.0571	8.9744e-06	0.1
3.4551e-06	0.0916	0.053	3.4551e-06	0.0906	0.0525	3.4551e-06	0.0922	0.0536	3.4551e-06	0.0944	0.0546	3.4551e-06	0.0964	0.0558	9.2308e-06	0.1
4.9239e-06	0.091	0.0522	4.9239e-06	0.0931	0.0532	4.9239e-06	0.0928	0.0528	4.9239e-06	0.0931	0.0535	4.9239e-06	0.097	0.0556	9.4872e-06	0.1
7.017e-06	0.0919	0.0521	7.017e-06	0.0907	0.0524	7.017e-06	0.0924	0.0525	7.017e-06	0.0948	0.0536	7.017e-06	0.0945	0.055	9.7436e-06	0.1
1e-05	0.0903	0.0524	1e-05	0.0926	0.0533	1e-05	0.0923	0.0532	1e-05	0.0919	0.0522	1e-05	0.093	0.0535	1e-05	0.1

## Sheet: Data3_Irregularly_spaced_kDeff
p=1.47 per 7 x 7 nm2			p= 2.94			p= 4.41			p= 8.82			p= 11.76			Control
kD_catenator	kD_eff	stdev of kD_eff	kD_catenator	kD_eff	stdev of kD_eff	kD_catenator	kD_eff	stdev of kD_eff	kD_catenator	kD_eff	stdev of kD_eff	kD_catenator	kD_eff	stdev of kD_eff	kD_catenator	kD_eff
1e-11	6.7163e-10	2.8208e-10	1e-11	1.1219e-10	7.3736e-11	1e-11	6.6907e-11	5.1895e-11	1e-11	3.3821e-11	3.6789e-11	1e-11	2.7081e-11	3.4135e-11	1e-11	1e-08
1.4251e-11	6.7915e-10	2.8319e-10	1.4251e-11	1.1168e-10	7.2775e-11	1.4251e-11	6.7547e-11	5.144e-11	1.4251e-11	3.383e-11	3.6625e-11	1.4251e-11	2.6198e-11	3.3781e-11	2.5642e-07	1e-08
2.0309e-11	6.7427e-10	2.8383e-10	2.0309e-11	1.1288e-10	7.3609e-11	2.0309e-11	6.6074e-11	5.2006e-11	2.0309e-11	3.2761e-11	3.6094e-11	2.0309e-11	2.494e-11	3.2388e-11	5.1283e-07	1e-08
2.8943e-11	6.9151e-10	2.8948e-10	2.8943e-11	1.1107e-10	7.4069e-11	2.8943e-11	6.4956e-11	5.151e-11	2.8943e-11	3.0509e-11	3.4989e-11	2.8943e-11	2.5555e-11	3.3284e-11	7.6924e-07	1e-08
4.1246e-11	7.0854e-10	3.0698e-10	4.1246e-11	1.1103e-10	7.2478e-11	4.1246e-11	6.5076e-11	5.2005e-11	4.1246e-11	3.0527e-11	3.4974e-11	4.1246e-11	2.3565e-11	3.1714e-11	1.0256e-06	1e-08
5.878e-11	7.1044e-10	3.0518e-10	5.878e-11	1.1277e-10	7.4118e-11	5.878e-11	6.2865e-11	5.1581e-11	5.878e-11	2.8724e-11	3.3445e-11	5.878e-11	2.3633e-11	3.1449e-11	1.2821e-06	1e-08
8.3768e-11	7.2086e-10	3.0582e-10	8.3768e-11	1.1296e-10	7.3453e-11	8.3768e-11	6.1103e-11	4.9084e-11	8.3768e-11	2.7734e-11	3.4269e-11	8.3768e-11	2.1803e-11	3.0638e-11	1.5385e-06	1e-08
1.1938e-10	7.597e-10	3.2059e-10	1.1938e-10	1.1634e-10	7.4169e-11	1.1938e-10	5.7378e-11	4.909e-11	1.1938e-10	2.5821e-11	3.2758e-11	1.1938e-10	2.1251e-11	3.0242e-11	1.7949e-06	1e-08
1.7013e-10	7.9791e-10	3.415e-10	1.7013e-10	1.1648e-10	7.6008e-11	1.7013e-10	5.6178e-11	4.8185e-11	1.7013e-10	2.3881e-11	3.1685e-11	1.7013e-10	1.9963e-11	2.8638e-11	2.0513e-06	1e-08
2.4245e-10	8.3433e-10	3.6147e-10	2.4245e-10	1.2202e-10	7.5202e-11	2.4245e-10	5.2803e-11	4.6598e-11	2.4245e-10	2.2611e-11	2.9958e-11	2.4245e-10	1.7631e-11	2.6789e-11	2.3077e-06	1e-08
3.4551e-10	9.06e-10	4.0283e-10	3.4551e-10	1.2437e-10	7.7411e-11	3.4551e-10	4.9386e-11	4.4677e-11	3.4551e-10	2.0098e-11	2.8301e-11	3.4551e-10	1.5227e-11	2.396e-11	2.5641e-06	1e-08
4.9239e-10	9.844e-10	4.2632e-10	4.9239e-10	1.3305e-10	8.0713e-11	4.9239e-10	4.6946e-11	4.2373e-11	4.9239e-10	1.812e-11	2.6656e-11	4.9239e-10	1.3402e-11	2.2317e-11	2.8205e-06	1e-08
7.017e-10	1.0869e-09	4.9068e-10	7.017e-10	1.4112e-10	8.3182e-11	7.017e-10	4.4072e-11	4.2242e-11	7.017e-10	1.6386e-11	2.4887e-11	7.017e-10	1.1858e-11	2.0723e-11	3.0769e-06	1e-08
1e-09	1.2283e-09	5.6772e-10	1e-09	1.5783e-10	9.0728e-11	1e-09	4.3939e-11	4.1059e-11	1e-09	1.3778e-11	2.1976e-11	1e-09	1.0518e-11	1.9176e-11	3.3333e-06	1e-08
1.4251e-09	1.3957e-09	6.4409e-10	1.4251e-09	1.761e-10	9.6321e-11	1.4251e-09	4.4907e-11	4.177e-11	1.4251e-09	1.3769e-11	2.2182e-11	1.4251e-09	9.6462e-12	1.8267e-11	3.5897e-06	1e-08
2.0309e-09	1.6503e-09	7.9944e-10	2.0309e-09	2.0792e-10	1.0948e-10	2.0309e-09	5.0535e-11	4.4436e-11	2.0309e-09	1.4422e-11	2.2385e-11	2.0309e-09	1.0377e-11	1.8522e-11	3.8462e-06	1e-08
2.8943e-09	2.0114e-09	1.0031e-09	2.8943e-09	2.4794e-10	1.2595e-10	2.8943e-09	6.0462e-11	4.9839e-11	2.8943e-09	1.7362e-11	2.4132e-11	2.8943e-09	1.2316e-11	2.0294e-11	4.1026e-06	1e-08
4.1246e-09	2.4669e-09	1.2813e-09	4.1246e-09	3.1407e-10	1.5461e-10	4.1246e-09	7.869e-11	5.7341e-11	4.1246e-09	2.1412e-11	2.7464e-11	4.1246e-09	1.5386e-11	2.3333e-11	4.359e-06	1e-08
5.878e-09	3.077e-09	1.6833e-09	5.878e-09	4.0974e-10	1.9718e-10	5.878e-09	1.0349e-10	6.9348e-11	5.878e-09	3.0112e-11	3.2457e-11	5.878e-09	2.0429e-11	2.6708e-11	4.6154e-06	1e-08
8.3768e-09	3.7406e-09	2.1111e-09	8.3768e-09	5.6064e-10	2.7118e-10	8.3768e-09	1.4814e-10	8.9083e-11	8.3768e-09	4.0545e-11	3.8348e-11	8.3768e-09	2.9266e-11	3.2232e-11	4.8718e-06	1e-08
1.1938e-08	4.6653e-09	2.7801e-09	1.1938e-08	8.2585e-10	4.1147e-10	1.1938e-08	2.1613e-10	1.1979e-10	1.1938e-08	5.9402e-11	4.7975e-11	1.1938e-08	4.1577e-11	4.0362e-11	5.1282e-06	1e-08
1.7013e-08	5.6161e-09	3.479e-09	1.7013e-08	1.2656e-09	6.5804e-10	1.7013e-08	3.3013e-10	1.6763e-10	1.7013e-08	8.5656e-11	6.0379e-11	1.7013e-08	5.9603e-11	4.8206e-11	5.3846e-06	1e-08
2.4245e-08	6.6437e-09	4.1623e-09	2.4245e-08	1.9952e-09	1.1113e-09	2.4245e-08	5.4153e-10	2.6751e-10	2.4245e-08	1.2523e-10	7.6891e-11	2.4245e-08	8.5848e-11	6.1309e-11	5.641e-06	1e-08
3.4551e-08	7.3694e-09	4.6499e-09	3.4551e-08	2.9887e-09	1.75e-09	3.4551e-08	9.1799e-10	4.6086e-10	3.4551e-08	1.8989e-10	1.0575e-10	3.4551e-08	1.2582e-10	7.7551e-11	5.8974e-06	1e-08
4.9239e-08	7.8799e-09	4.8924e-09	4.9239e-08	4.3112e-09	2.6272e-09	4.9239e-08	1.6369e-09	8.9428e-10	4.9239e-08	2.9244e-10	1.4899e-10	4.9239e-08	1.9087e-10	1.0307e-10	6.1538e-06	1e-08
7.017e-08	8.7648e-09	5.586e-09	7.017e-08	5.679e-09	3.5644e-09	7.017e-08	2.7242e-09	1.63e-09	7.017e-08	4.7216e-10	2.2577e-10	7.017e-08	2.8729e-10	1.4807e-10	6.4103e-06	1e-08
1e-07	8.9992e-09	5.673e-09	1e-07	6.6575e-09	4.2522e-09	1e-07	4.1487e-09	2.5858e-09	1e-07	7.9904e-10	4.0137e-10	1e-07	4.5734e-10	2.2216e-10	6.6667e-06	1e-08
1.4251e-07	9.3009e-09	5.8221e-09	1.4251e-07	7.744e-09	4.9203e-09	1.4251e-07	5.7228e-09	3.6129e-09	1.4251e-07	1.4661e-09	8.0311e-10	1.4251e-07	7.7321e-10	3.6805e-10	6.9231e-06	1e-08
2.0309e-07	9.5531e-09	6.0889e-09	2.0309e-07	8.2287e-09	5.2495e-09	2.0309e-07	6.8337e-09	4.3442e-09	2.0309e-07	2.6474e-09	1.5739e-09	2.0309e-07	1.4029e-09	7.4921e-10	7.1795e-06	1e-08
2.8943e-07	9.5913e-09	6.0755e-09	2.8943e-07	8.8834e-09	5.6942e-09	2.8943e-07	7.759e-09	4.9896e-09	2.8943e-07	4.2619e-09	2.7215e-09	2.8943e-07	2.5587e-09	1.5463e-09	7.4359e-06	1e-08
4.1246e-07	9.6954e-09	6.2652e-09	4.1246e-07	9.0441e-09	5.6646e-09	4.1246e-07	8.5057e-09	5.4985e-09	4.1246e-07	5.714e-09	3.6261e-09	4.1246e-07	4.1637e-09	2.6658e-09	7.6923e-06	1e-08
5.878e-07	9.9353e-09	6.3233e-09	5.878e-07	9.4891e-09	6.102e-09	5.878e-07	8.9209e-09	5.6988e-09	5.878e-07	6.9436e-09	4.4575e-09	5.878e-07	5.8625e-09	3.7585e-09	7.9487e-06	1e-08
8.3768e-07	9.9509e-09	6.3866e-09	8.3768e-07	9.5812e-09	6.1128e-09	8.3768e-07	9.1378e-09	5.8056e-09	8.3768e-07	7.9648e-09	5.1089e-09	8.3768e-07	6.8951e-09	4.5009e-09	8.2051e-06	1e-08
1.1938e-06	9.882e-09	6.2632e-09	1.1938e-06	9.6834e-09	6.2601e-09	1.1938e-06	9.3591e-09	5.9776e-09	1.1938e-06	8.5382e-09	5.4748e-09	1.1938e-06	7.9419e-09	5.1756e-09	8.4615e-06	1e-08
1.7013e-06	9.9304e-09	6.3542e-09	1.7013e-06	9.6806e-09	6.0046e-09	1.7013e-06	9.482e-09	5.9408e-09	1.7013e-06	8.8881e-09	5.6628e-09	1.7013e-06	8.4538e-09	5.4229e-09	8.718e-06	1e-08
2.4245e-06	1.0076e-08	6.5352e-09	2.4245e-06	1.005e-08	6.4444e-09	2.4245e-06	9.8007e-09	6.2374e-09	2.4245e-06	9.1036e-09	5.6845e-09	2.4245e-06	8.9434e-09	5.6494e-09	8.9744e-06	1e-08
3.4551e-06	9.9188e-09	6.3212e-09	3.4551e-06	1.004e-08	6.3982e-09	3.4551e-06	9.8503e-09	6.3086e-09	3.4551e-06	9.5977e-09	6.1312e-09	3.4551e-06	9.3687e-09	5.9942e-09	9.2308e-06	1e-08
4.9239e-06	9.9881e-09	6.2996e-09	4.9239e-06	9.745e-09	6.1434e-09	4.9239e-06	9.7761e-09	6.1299e-09	4.9239e-06	9.745e-09	6.1815e-09	4.9239e-06	9.3053e-09	5.9099e-09	9.4872e-06	1e-08
7.017e-06	9.8849e-09	6.1776e-09	7.017e-06	1.002e-08	6.3605e-09	7.017e-06	9.8226e-09	6.1453e-09	7.017e-06	9.5495e-09	5.9629e-09	7.017e-06	9.5831e-09	6.1624e-09	9.7436e-06	1e-08
1e-05	1.0077e-08	6.43e-09	1e-05	9.7941e-09	6.2055e-09	1e-05	9.8341e-09	6.2465e-09	1e-05	9.884e-09	6.1838e-09	1e-05	9.7516e-09	6.188e-09	1e-05	1e-08

## Sheet: Supple1_fd
	L=5 nm	L=6 nm	L=7 nm	L=8 nm	L=9 nm
d(nm)	f(d) [M]	f(d) [M]	f(d) [M]	f(d) [M]	f(d) [M]
5	9.9547e-07	7.5558e-07	5.6379e-07	4.2375e-07	3.2337e-07
5.3333	8.7719e-07	6.936e-07	5.2775e-07	4.0198e-07	3.0942e-07
5.6667	7.6446e-07	6.327e-07	4.9293e-07	3.805e-07	2.9581e-07
6	6.6177e-07	5.7404e-07	4.5907e-07	3.5969e-07	2.8227e-07
6.3333	5.6309e-07	5.184e-07	4.2536e-07	3.3896e-07	2.6885e-07
6.6667	4.6907e-07	4.6352e-07	3.9296e-07	3.1863e-07	2.5578e-07
7	3.8456e-07	4.1147e-07	3.6156e-07	2.9896e-07	2.428e-07
7.3333	3.0824e-07	3.6285e-07	3.3092e-07	2.7957e-07	2.2996e-07
7.6667	2.3849e-07	3.1628e-07	3.017e-07	2.606e-07	2.1762e-07
8	1.7669e-07	2.7288e-07	2.7344e-07	2.4235e-07	2.0533e-07
8.3333	1.2399e-07	2.3122e-07	2.4592e-07	2.243e-07	1.9325e-07
8.6667	7.935e-08	1.9285e-07	2.1971e-07	2.0688e-07	1.8162e-07
9	4.3278e-08	1.5753e-07	1.9491e-07	1.9001e-07	1.7007e-07
9.3333	1.9081e-08	1.2557e-07	1.7122e-07	1.7372e-07	1.5882e-07
9.6667	4.9289e-09	9.7485e-08	1.4888e-07	1.5813e-07	1.4798e-07
10	0	7.2227e-08	1.2837e-07	1.4307e-07	1.3738e-07
10.3333	0	5.0443e-08	1.0856e-07	1.2853e-07	1.2705e-07
10.6667	0	3.2381e-08	9.0124e-08	1.1485e-07	1.1706e-07
11	0	1.7646e-08	7.3553e-08	1.0161e-07	1.0745e-07
11.3333	0	7.9244e-09	5.8732e-08	8.9216e-08	9.8097e-08
11.6667	0	1.9689e-09	4.5327e-08	7.7581e-08	8.9242e-08
12	0	0	3.3797e-08	6.6562e-08	8.0707e-08
12.3333	0	0	2.3608e-08	5.6349e-08	7.2422e-08
12.6667	0	0	1.5081e-08	4.6889e-08	6.4593e-08
13	0	0	8.3893e-09	3.8138e-08	5.7145e-08
13.3333	0	0	3.7606e-09	3.0437e-08	5.0114e-08
13.6667	0	0	9.353e-10	2.3534e-08	4.3518e-08
14	0	0	0	1.736e-08	3.7368e-08

## Sheet: Supple2_higher_densities_BO
p=14.7 per 7 x 7 nm2		p=29.4 per 7 x 7 nm2		p=44.1 per 7 x 7 nm2		p=58.8 per 7 x 7 nm2		Control
kD_catenator	Binding Occupancy	kD_catenator	Binding Occupancy	kD_catenator	Binding Occupancy	kD_catenator	Binding Occupancy	kD_catenator	Binding Occupancy
1e-08	0.986	1e-08	0.9926	1e-08	0.995	1e-08	0.9968	1e-08	0.1
1.4251e-08	0.9869	1.4251e-08	0.9933	1.4251e-08	0.9955	1.4251e-08	0.9971	0.00025642	0.1
2.0309e-08	0.9883	2.0309e-08	0.994	2.0309e-08	0.9959	2.0309e-08	0.9973	0.00051283	0.1
2.8943e-08	0.9896	2.8943e-08	0.9948	2.8943e-08	0.9965	2.8943e-08	0.9977	0.00076924	0.1
4.1246e-08	0.9911	4.1246e-08	0.9955	4.1246e-08	0.997	4.1246e-08	0.9981	0.001	0.1
5.878e-08	0.9925	5.878e-08	0.9964	5.878e-08	0.9975	5.878e-08	0.9986	0.0013	0.1
8.3768e-08	0.994	8.3768e-08	0.9972	8.3768e-08	0.9981	8.3768e-08	0.999	0.0015	0.1
1.1938e-07	0.9953	1.1938e-07	0.9978	1.1938e-07	0.9987	1.1938e-07	0.9994	0.0018	0.1
1.7013e-07	0.9965	1.7013e-07	0.9984	1.7013e-07	0.9991	1.7013e-07	0.9996	0.0021	0.1
2.4245e-07	0.9972	2.4245e-07	0.9989	2.4245e-07	0.9993	2.4245e-07	0.9997	0.0023	0.1
3.4551e-07	0.9977	3.4551e-07	0.999	3.4551e-07	0.9994	3.4551e-07	0.9996	0.0026	0.1
4.9239e-07	0.9976	4.9239e-07	0.9989	4.9239e-07	0.9993	4.9239e-07	0.9996	0.0028	0.1
7.017e-07	0.9974	7.017e-07	0.9988	7.017e-07	0.9992	7.017e-07	0.9995	0.0031	0.1
1e-06	0.9967	1e-06	0.9985	1e-06	0.999	1e-06	0.9993	0.0033	0.1
1.4251e-06	0.9957	1.4251e-06	0.9979	1.4251e-06	0.9987	1.4251e-06	0.9991	0.0036	0.1
2.0309e-06	0.9943	2.0309e-06	0.9973	2.0309e-06	0.9982	2.0309e-06	0.9987	0.0038	0.1
2.8943e-06	0.9923	2.8943e-06	0.9963	2.8943e-06	0.9976	2.8943e-06	0.9982	0.0041	0.1
4.1246e-06	0.989	4.1246e-06	0.9949	4.1246e-06	0.9966	4.1246e-06	0.9974	0.0044	0.1
5.878e-06	0.9845	5.878e-06	0.9928	5.878e-06	0.9952	5.878e-06	0.9965	0.0046	0.1
8.3768e-06	0.9781	8.3768e-06	0.9899	8.3768e-06	0.9932	8.3768e-06	0.995	0.0049	0.1
1.1938e-05	0.969	1.1938e-05	0.9855	1.1938e-05	0.9904	1.1938e-05	0.9928	0.0051	0.1
1.7013e-05	0.956	1.7013e-05	0.9794	1.7013e-05	0.9862	1.7013e-05	0.9899	0.0054	0.1
2.4245e-05	0.9382	2.4245e-05	0.9706	2.4245e-05	0.9808	2.4245e-05	0.9858	0.0056	0.1
3.4551e-05	0.912	3.4551e-05	0.9585	3.4551e-05	0.9726	3.4551e-05	0.9795	0.0059	0.1
4.9239e-05	0.876	4.9239e-05	0.9414	4.9239e-05	0.9614	4.9239e-05	0.9711	0.0062	0.1
7.017e-05	0.8256	7.017e-05	0.9176	7.017e-05	0.9456	7.017e-05	0.9595	0.0064	0.1
0.0001	0.7559	0.0001	0.884	0.0001	0.9231	0.0001	0.9424	0.0067	0.1
0.00014251	0.659	0.00014251	0.8369	0.00014251	0.8921	0.00014251	0.9188	0.0069	0.1
0.00020309	0.5329	0.00020309	0.7724	0.00020309	0.8489	0.00020309	0.8869	0.0072	0.1
0.00028943	0.3856	0.00028943	0.6851	0.00028943	0.7883	0.00028943	0.841	0.0074	0.1
0.00041246	0.2593	0.00041246	0.5698	0.00041246	0.7078	0.00041246	0.7782	0.0077	0.1
0.0005878	0.183	0.0005878	0.431	0.0005878	0.6004	0.0005878	0.6939	0.0079	0.1
0.00083768	0.1426	0.00083768	0.2945	0.00083768	0.4666	0.00083768	0.5834	0.0082	0.1
0.0012	0.1221	0.0012	0.2012	0.0012	0.3281	0.0012	0.4489	0.0085	0.1
0.0017	0.1107	0.0017	0.1513	0.0017	0.2209	0.0017	0.3112	0.0087	0.1
0.0024	0.1033	0.0024	0.1268	0.0024	0.1616	0.0024	0.2113	0.009	0.1
0.0035	0.0988	0.0035	0.1128	0.0035	0.1311	0.0035	0.1561	0.0092	0.1
0.0049	0.0971	0.0049	0.105	0.0049	0.1159	0.0049	0.1288	0.0095	0.1
0.007	0.0942	0.007	0.1002	0.007	0.1065	0.007	0.114	0.0097	0.1
0.01	0.0939	0.01	0.0972	0.01	0.1017	0.01	0.1057	0.01	0.1

## Sheet: Supple2_higher_densities_kDeff
p=14.7 per 7 x 7 nm2		p=29.4 per 7 x 7 nm2		p=44.1 per 7 x 7 nm2		p=58.8 per 7 x 7 nm2		Control
kD_catenator	kD_eff	kD_catenator	kD_eff	kD_catenator	kD_eff	kD_catenator	kD_eff	kD_catenator	kD_eff
1e-08	1.4209e-11	1e-08	7.4334e-12	1e-08	4.9829e-12	1e-08	3.2472e-12	1e-08	1e-08
1.4251e-08	1.3293e-11	1.4251e-08	6.7797e-12	1.4251e-08	4.5486e-12	1.4251e-08	2.9457e-12	0.00025642	1e-08
2.0309e-08	1.1889e-11	2.0309e-08	6.0236e-12	2.0309e-08	4.1163e-12	2.0309e-08	2.6584e-12	0.00051283	1e-08
2.8943e-08	1.0515e-11	2.8943e-08	5.2551e-12	2.8943e-08	3.4881e-12	2.8943e-08	2.3554e-12	0.00076924	1e-08
4.1246e-08	9.0045e-12	4.1246e-08	4.5026e-12	4.1246e-08	3.0245e-12	4.1246e-08	1.911e-12	0.001	1e-08
5.878e-08	7.5707e-12	5.878e-08	3.595e-12	5.878e-08	2.4763e-12	5.878e-08	1.3801e-12	0.0013	1e-08
8.3768e-08	6.0537e-12	8.3768e-08	2.8573e-12	8.3768e-08	1.9058e-12	8.3768e-08	9.7935e-13	0.0015	1e-08
1.1938e-07	4.7285e-12	1.1938e-07	2.1684e-12	1.1938e-07	1.3147e-12	1.1938e-07	6.1011e-13	0.0018	1e-08
1.7013e-07	3.5075e-12	1.7013e-07	1.557e-12	1.7013e-07	8.9925e-13	1.7013e-07	4.0666e-13	0.0021	1e-08
2.4245e-07	2.8327e-12	2.4245e-07	1.1317e-12	2.4245e-07	7.1829e-13	2.4245e-07	3.4497e-13	0.0023	1e-08
3.4551e-07	2.3493e-12	3.4551e-07	1.0014e-12	3.4551e-07	6.4929e-13	3.4551e-07	3.8772e-13	0.0026	1e-08
4.9239e-07	2.4e-12	4.9239e-07	1.0956e-12	4.9239e-07	6.5527e-13	4.9239e-07	4.2499e-13	0.0028	1e-08
7.017e-07	2.5938e-12	7.017e-07	1.2271e-12	7.017e-07	7.9382e-13	7.017e-07	5.3679e-13	0.0031	1e-08
1e-06	3.3109e-12	1e-06	1.5178e-12	1e-06	1.0417e-12	1e-06	6.9934e-13	0.0033	1e-08
1.4251e-06	4.2744e-12	1.4251e-06	2.063e-12	1.4251e-06	1.3277e-12	1.4251e-06	8.9252e-13	0.0036	1e-08
2.0309e-06	5.7408e-12	2.0309e-06	2.7541e-12	2.0309e-06	1.7887e-12	2.0309e-06	1.3391e-12	0.0038	1e-08
2.8943e-06	7.7765e-12	2.8943e-06	3.726e-12	2.8943e-06	2.395e-12	2.8943e-06	1.8154e-12	0.0041	1e-08
4.1246e-06	1.116e-11	4.1246e-06	5.1121e-12	4.1246e-06	3.3844e-12	4.1246e-06	2.5725e-12	0.0044	1e-08
5.878e-06	1.5787e-11	5.878e-06	7.2705e-12	5.878e-06	4.7994e-12	5.878e-06	3.552e-12	0.0046	1e-08
8.3768e-06	2.2378e-11	8.3768e-06	1.0237e-11	8.3768e-06	6.8533e-12	8.3768e-06	5.0023e-12	0.0049	1e-08
1.1938e-05	3.1949e-11	1.1938e-05	1.4665e-11	1.1938e-05	9.6622e-12	1.1938e-05	7.247e-12	0.0051	1e-08
1.7013e-05	4.5998e-11	1.7013e-05	2.0985e-11	1.7013e-05	1.3985e-11	1.7013e-05	1.025e-11	0.0054	1e-08
2.4245e-05	6.5853e-11	2.4245e-05	3.0267e-11	2.4245e-05	1.9621e-11	2.4245e-05	1.4392e-11	0.0056	1e-08
3.4551e-05	9.6498e-11	3.4551e-05	4.3326e-11	3.4551e-05	2.8139e-11	3.4551e-05	2.0937e-11	0.0059	1e-08
4.9239e-05	1.4149e-10	4.9239e-05	6.2219e-11	4.9239e-05	4.0199e-11	4.9239e-05	2.9731e-11	0.0062	1e-08
7.017e-05	2.1124e-10	7.017e-05	8.9793e-11	7.017e-05	5.7487e-11	7.017e-05	4.2197e-11	0.0064	1e-08
0.0001	3.229e-10	0.0001	1.3127e-10	0.0001	8.3262e-11	0.0001	6.1142e-11	0.0067	1e-08
0.00014251	5.1744e-10	0.00014251	1.9486e-10	0.00014251	1.2099e-10	0.00014251	8.8349e-11	0.0069	1e-08
0.00020309	8.7655e-10	0.00020309	2.946e-10	0.00020309	1.7806e-10	0.00020309	1.2757e-10	0.0072	1e-08
0.00028943	1.5933e-09	0.00028943	4.5974e-10	0.00028943	2.6857e-10	0.00028943	1.8904e-10	0.0074	1e-08
0.00041246	2.8571e-09	0.00041246	7.5487e-10	0.00041246	4.1289e-10	0.00041246	2.8502e-10	0.0077	1e-08
0.0005878	4.4645e-09	0.0005878	1.3204e-09	0.0005878	6.6546e-10	0.0005878	4.4113e-10	0.0079	1e-08
0.00083768	6.0127e-09	0.00083768	2.3951e-09	0.00083768	1.1434e-09	0.00083768	7.1395e-10	0.0082	1e-08
0.0012	7.1891e-09	0.0012	3.9692e-09	0.0012	2.0477e-09	0.0012	1.2277e-09	0.0085	1e-08
0.0017	8.0314e-09	0.0017	5.6103e-09	0.0017	3.5265e-09	0.0017	2.2136e-09	0.0087	1e-08
0.0024	8.6844e-09	0.0024	6.8881e-09	0.0024	5.1872e-09	0.0024	3.7325e-09	0.009	1e-08

## Sheet: Supple3_intrinsic_binding_BO
[catAb]/kD = 1.0		[catAb]/kD = 0.3		[catAb]/kD = 0.1		[catAb]/kD = 0.03		[catAb]/kD = 0.01
kD_catenator	Binding Occupancy	kD_catenator	Binding Occupancy	kD_catenator	Binding Occupancy	kD_catenator	Binding Occupancy	kD_catenator	Binding Occupancy
1e-11	0.9863	1e-11	0.977	1e-11	0.9026	1e-11	0.6602	1e-11	0.5026
1.4251e-11	0.9868	1.4251e-11	0.9768	1.4251e-11	0.9034	1.4251e-11	0.6595	1.4251e-11	0.5018
2.0309e-11	0.9875	2.0309e-11	0.9768	2.0309e-11	0.9026	2.0309e-11	0.6604	2.0309e-11	0.5022
2.8943e-11	0.9883	2.8943e-11	0.9779	2.8943e-11	0.9034	2.8943e-11	0.6603	2.8943e-11	0.5033
4.1246e-11	0.9893	4.1246e-11	0.9788	4.1246e-11	0.9033	4.1246e-11	0.6618	4.1246e-11	0.5028
5.878e-11	0.9907	5.878e-11	0.9803	5.878e-11	0.9047	5.878e-11	0.6607	5.878e-11	0.5014
8.3768e-11	0.9926	8.3768e-11	0.9821	8.3768e-11	0.9045	8.3768e-11	0.6612	8.3768e-11	0.4983
1.1938e-10	0.9947	1.1938e-10	0.9841	1.1938e-10	0.9074	1.1938e-10	0.6603	1.1938e-10	0.4954
1.7013e-10	0.9968	1.7013e-10	0.9872	1.7013e-10	0.9092	1.7013e-10	0.6602	1.7013e-10	0.4926
2.4245e-10	0.9981	2.4245e-10	0.9899	2.4245e-10	0.9118	2.4245e-10	0.6612	2.4245e-10	0.4877
3.4551e-10	0.9984	3.4551e-10	0.9918	3.4551e-10	0.9167	3.4551e-10	0.6606	3.4551e-10	0.4787
4.9239e-10	0.9979	4.9239e-10	0.992	4.9239e-10	0.92	4.9239e-10	0.6593	4.9239e-10	0.4702
7.017e-10	0.9966	7.017e-10	0.9892	7.017e-10	0.9216	7.017e-10	0.6567	7.017e-10	0.4477
1e-09	0.9948	1e-09	0.9835	1e-09	0.9155	1e-09	0.6403	1e-09	0.4123
1.4251e-09	0.9919	1.4251e-09	0.9735	1.4251e-09	0.8961	1.4251e-09	0.5952	1.4251e-09	0.3431
2.0309e-09	0.9868	2.0309e-09	0.959	2.0309e-09	0.8548	2.0309e-09	0.507	2.0309e-09	0.2358
2.8943e-09	0.9796	2.8943e-09	0.9353	2.8943e-09	0.7829	2.8943e-09	0.3615	2.8943e-09	0.0999
4.1246e-09	0.968	4.1246e-09	0.8982	4.1246e-09	0.6698	4.1246e-09	0.1737	4.1246e-09	0.0241
5.878e-09	0.9502	5.878e-09	0.8424	5.878e-09	0.5016	5.878e-09	0.0683	5.878e-09	0.0122
8.3768e-09	0.9239	8.3768e-09	0.762	8.3768e-09	0.31	8.3768e-09	0.0452	8.3768e-09	0.0107
1.1938e-08	0.8845	1.1938e-08	0.646	1.1938e-08	0.1887	1.1938e-08	0.0378	1.1938e-08	0.0105
1.7013e-08	0.8316	1.7013e-08	0.5121	1.7013e-08	0.1359	1.7013e-08	0.0348	1.7013e-08	0.0102
2.4245e-08	0.7621	2.4245e-08	0.3972	2.4245e-08	0.116	2.4245e-08	0.0334	2.4245e-08	0.01
3.4551e-08	0.6892	3.4551e-08	0.3281	3.4551e-08	0.1045	3.4551e-08	0.032	3.4551e-08	0.0102
4.9239e-08	0.6235	4.9239e-08	0.2906	4.9239e-08	0.0981	4.9239e-08	0.0317	4.9239e-08	0.0099
7.017e-08	0.5794	7.017e-08	0.2689	7.017e-08	0.0955	7.017e-08	0.0312	7.017e-08	0.0099
1e-07	0.548	1e-07	0.2577	1e-07	0.093	1e-07	0.0309	1e-07	0.0098
1.4251e-07	0.5292	1.4251e-07	0.2502	1.4251e-07	0.0928	1.4251e-07	0.0306	1.4251e-07	0.0099
2.0309e-07	0.5183	2.0309e-07	0.247	2.0309e-07	0.0915	2.0309e-07	0.0309	2.0309e-07	0.01
2.8943e-07	0.5119	2.8943e-07	0.2443	2.8943e-07	0.0914	2.8943e-07	0.0307	2.8943e-07	0.0101
4.1246e-07	0.5069	4.1246e-07	0.2422	4.1246e-07	0.0905	4.1246e-07	0.0302	4.1246e-07	0.0099
5.878e-07	0.5033	5.878e-07	0.2425	5.878e-07	0.0911	5.878e-07	0.031	5.878e-07	0.01
8.3768e-07	0.5029	8.3768e-07	0.2417	8.3768e-07	0.0909	8.3768e-07	0.0305	8.3768e-07	0.0101
1.1938e-06	0.5031	1.1938e-06	0.2406	1.1938e-06	0.0905	1.1938e-06	0.0307	1.1938e-06	0.01
1.7013e-06	0.5008	1.7013e-06	0.2405	1.7013e-06	0.0909	1.7013e-06	0.031	1.7013e-06	0.0099
2.4245e-06	0.5012	2.4245e-06	0.241	2.4245e-06	0.0909	2.4245e-06	0.0312	2.4245e-06	0.01
3.4551e-06	0.4993	3.4551e-06	0.2414	3.4551e-06	0.0905	3.4551e-06	0.0304	3.4551e-06	0.0098
4.9239e-06	0.4989	4.9239e-06	0.2415	4.9239e-06	0.0915	4.9239e-06	0.0307	4.9239e-06	0.01
7.017e-06	0.5004	7.017e-06	0.2416	7.017e-06	0.0909	7.017e-06	0.0303	7.017e-06	0.01
1e-05	0.502	1e-05	0.2394	1e-05	0.0914	1e-05	0.031	1e-05	0.0097

## Sheet: Supple3_intrinsic_binding_kDeff
[catAb]/kD = 1.0		[catAb]/kD = 0.3		[catAb]/kD = 0.1		[catAb]/kD = 0.03		[catAb]/kD = 0.01
kD_catenator	kD_eff	kD_catenator	kD_eff	kD_catenator	kD_eff	kD_catenator	kD_eff	kD_catenator	kD_eff
1e-11	1.3872e-11	1e-11	2.3535e-11	1e-11	1.0786e-10	1e-11	5.148e-10	1e-11	9.898e-10
1.4251e-11	1.3352e-11	1.4251e-11	2.3721e-11	1.4251e-11	1.0689e-10	1.4251e-11	5.162e-10	1.4251e-11	9.9291e-10
2.0309e-11	1.2705e-11	2.0309e-11	2.3757e-11	2.0309e-11	1.0793e-10	2.0309e-11	5.1419e-10	2.0309e-11	9.911e-10
2.8943e-11	1.1878e-11	2.8943e-11	2.2586e-11	2.8943e-11	1.069e-10	2.8943e-11	5.1451e-10	2.8943e-11	9.8677e-10
4.1246e-11	1.0793e-11	4.1246e-11	2.1675e-11	4.1246e-11	1.0704e-10	4.1246e-11	5.111e-10	4.1246e-11	9.8879e-10
5.878e-11	9.3617e-12	5.878e-11	2.005e-11	5.878e-11	1.0531e-10	5.878e-11	5.1358e-10	5.878e-11	9.9455e-10
8.3768e-11	7.4592e-12	8.3768e-11	1.8236e-11	8.3768e-11	1.056e-10	8.3768e-11	5.1239e-10	8.3768e-11	1.0067e-09
1.1938e-10	5.3321e-12	1.1938e-10	1.6117e-11	1.1938e-10	1.0204e-10	1.1938e-10	5.1435e-10	1.1938e-10	1.0186e-09
1.7013e-10	3.1689e-12	1.7013e-10	1.2994e-11	1.7013e-10	9.9829e-11	1.7013e-10	5.1471e-10	1.7013e-10	1.0302e-09
2.4245e-10	1.9044e-12	2.4245e-10	1.019e-11	2.4245e-10	9.6731e-11	2.4245e-10	5.1229e-10	2.4245e-10	1.0506e-09
3.4551e-10	1.5794e-12	3.4551e-10	8.2791e-12	3.4551e-10	9.0913e-11	3.4551e-10	5.1372e-10	3.4551e-10	1.0889e-09
4.9239e-10	2.0795e-12	4.9239e-10	8.1119e-12	4.9239e-10	8.6996e-11	4.9239e-10	5.1684e-10	4.9239e-10	1.1266e-09
7.017e-10	3.3971e-12	7.017e-10	1.0935e-11	7.017e-10	8.5065e-11	7.017e-10	5.2271e-10	7.017e-10	1.2339e-09
1e-09	5.2239e-12	1e-09	1.6797e-11	1e-09	9.2296e-11	1e-09	5.6178e-10	1e-09	1.4252e-09
1.4251e-09	8.1423e-12	1.4251e-09	2.7242e-11	1.4251e-09	1.1598e-10	1.4251e-09	6.8008e-10	1.4251e-09	1.9148e-09
2.0309e-09	1.3426e-11	2.0309e-09	4.2767e-11	2.0309e-09	1.6984e-10	2.0309e-09	9.7231e-10	2.0309e-09	3.2415e-09
2.8943e-09	2.0836e-11	2.8943e-09	6.9178e-11	2.8943e-09	2.7731e-10	2.8943e-09	1.7659e-09	2.8943e-09	9.0059e-09
4.1246e-09	3.3082e-11	4.1246e-09	1.1335e-10	4.1246e-09	4.929e-10	4.1246e-09	4.7574e-09	4.1246e-09	4.0579e-08
5.878e-09	5.2446e-11	5.878e-09	1.8705e-10	5.878e-09	9.935e-10	5.878e-09	1.3649e-08	5.878e-09	8.1054e-08
8.3768e-09	8.2359e-11	8.3768e-09	3.1229e-10	8.3768e-09	2.2261e-09	8.3768e-09	2.1108e-08	8.3768e-09	9.2264e-08
1.1938e-08	1.3059e-10	1.1938e-08	5.4801e-10	1.1938e-08	4.2985e-09	1.1938e-08	2.5428e-08	1.1938e-08	9.4551e-08
1.7013e-08	2.0251e-10	1.7013e-08	9.5289e-10	1.7013e-08	6.3562e-09	1.7013e-08	2.7695e-08	1.7013e-08	9.7096e-08
2.4245e-08	3.1208e-10	2.4245e-08	1.5174e-09	2.4245e-08	7.6215e-09	2.4245e-08	2.8951e-08	2.4245e-08	9.9252e-08
3.4551e-08	4.5094e-10	3.4551e-08	2.0477e-09	3.4551e-08	8.5655e-09	3.4551e-08	3.0255e-08	3.4551e-08	9.7457e-08
4.9239e-08	6.0384e-10	4.9239e-08	2.441e-09	4.9239e-08	9.1896e-09	4.9239e-08	3.0537e-08	4.9239e-08	1.0042e-07
7.017e-08	7.2606e-10	7.017e-08	2.7195e-09	7.017e-08	9.4713e-09	7.017e-08	3.1015e-08	7.017e-08	1.0042e-07
1e-07	8.2494e-10	1e-07	2.8801e-09	1e-07	9.7532e-09	1e-07	3.1387e-08	1e-07	1.0083e-07
1.4251e-07	8.8963e-10	1.4251e-07	2.9961e-09	1.4251e-07	9.7755e-09	1.4251e-07	3.1704e-08	1.4251e-07	9.9654e-08
2.0309e-07	9.2941e-10	2.0309e-07	3.0487e-09	2.0309e-07	9.9271e-09	2.0309e-07	3.1366e-08	2.0309e-07	9.9152e-08
2.8943e-07	9.5349e-10	2.8943e-07	3.0932e-09	2.8943e-07	9.9381e-09	2.8943e-07	3.1606e-08	2.8943e-07	9.782e-08
4.1246e-07	9.7269e-10	4.1246e-07	3.1281e-09	4.1246e-07	1.0055e-08	4.1246e-07	3.2079e-08	4.1246e-07	9.9604e-08
5.878e-07	9.8677e-10	5.878e-07	3.1231e-09	5.878e-07	9.9764e-09	5.878e-07	3.1218e-08	5.878e-07	9.9152e-08
8.3768e-07	9.8861e-10	8.3768e-07	3.1381e-09	8.3768e-07	9.996e-09	8.3768e-07	3.176e-08	8.3768e-07	9.7699e-08
1.1938e-06	9.8753e-10	1.1938e-06	3.157e-09	1.1938e-06	1.005e-08	1.1938e-06	3.1611e-08	1.1938e-06	9.9002e-08
1.7013e-06	9.9678e-10	1.7013e-06	3.1585e-09	1.7013e-06	1.0005e-08	1.7013e-06	3.1226e-08	1.7013e-06	1.0021e-07
2.4245e-06	9.953e-10	2.4245e-06	3.1501e-09	2.4245e-06	9.9996e-09	2.4245e-06	3.1087e-08	2.4245e-06	9.9202e-08
3.4551e-06	1.0029e-09	3.4551e-06	3.1431e-09	3.4551e-06	1.0051e-08	3.4551e-06	3.1878e-08	3.4551e-06	1.0093e-07
4.9239e-06	1.0043e-09	4.9239e-06	3.141e-09	4.9239e-06	9.9236e-09	4.9239e-06	3.159e-08	4.9239e-06	9.8977e-08
7.017e-06	9.984e-10	7.017e-06	3.139e-09	7.017e-06	1.0004e-08	7.017e-06	3.2046e-08	7.017e-06	9.863e-08
1e-05	9.9193e-10	1e-05	3.1763e-09	1e-05	9.9444e-09	1e-05	3.126e-08	1e-05	1.0216e-07
