# Supplementary material for: Noncovalent antibody catenation on a target surface greatly increases the antigen-binding avidity
Source: eLife. 2023 May 30;12:e81646. doi: 10.7554/eLife.81646 (PMC10229114; doi:10.7554/eLife.81646)
Supplement: Figure 2—figure supplement 1—source data 1. [file elife-81646-fig2-figsupp1-data1.xlsx]

## Sheet: Supple1_fd
	L=5 nm	L=6 nm	L=7 nm	L=8 nm	L=9 nm
d(nm)	f(d) [M]	f(d) [M]	f(d) [M]	f(d) [M]	f(d) [M]
5	9.9547e-07	7.5558e-07	5.6379e-07	4.2375e-07	3.2337e-07
5.3333	8.7719e-07	6.936e-07	5.2775e-07	4.0198e-07	3.0942e-07
5.6667	7.6446e-07	6.327e-07	4.9293e-07	3.805e-07	2.9581e-07
6	6.6177e-07	5.7404e-07	4.5907e-07	3.5969e-07	2.8227e-07
6.3333	5.6309e-07	5.184e-07	4.2536e-07	3.3896e-07	2.6885e-07
6.6667	4.6907e-07	4.6352e-07	3.9296e-07	3.1863e-07	2.5578e-07
7	3.8456e-07	4.1147e-07	3.6156e-07	2.9896e-07	2.428e-07
7.3333	3.0824e-07	3.6285e-07	3.3092e-07	2.7957e-07	2.2996e-07
7.6667	2.3849e-07	3.1628e-07	3.017e-07	2.606e-07	2.1762e-07
8	1.7669e-07	2.7288e-07	2.7344e-07	2.4235e-07	2.0533e-07
8.3333	1.2399e-07	2.3122e-07	2.4592e-07	2.243e-07	1.9325e-07
8.6667	7.935e-08	1.9285e-07	2.1971e-07	2.0688e-07	1.8162e-07
9	4.3278e-08	1.5753e-07	1.9491e-07	1.9001e-07	1.7007e-07
9.3333	1.9081e-08	1.2557e-07	1.7122e-07	1.7372e-07	1.5882e-07
9.6667	4.9289e-09	9.7485e-08	1.4888e-07	1.5813e-07	1.4798e-07
10	0	7.2227e-08	1.2837e-07	1.4307e-07	1.3738e-07
10.3333	0	5.0443e-08	1.0856e-07	1.2853e-07	1.2705e-07
10.6667	0	3.2381e-08	9.0124e-08	1.1485e-07	1.1706e-07
11	0	1.7646e-08	7.3553e-08	1.0161e-07	1.0745e-07
11.3333	0	7.9244e-09	5.8732e-08	8.9216e-08	9.8097e-08
11.6667	0	1.9689e-09	4.5327e-08	7.7581e-08	8.9242e-08
12	0	0	3.3797e-08	6.6562e-08	8.0707e-08
12.3333	0	0	2.3608e-08	5.6349e-08	7.2422e-08
12.6667	0	0	1.5081e-08	4.6889e-08	6.4593e-08
13	0	0	8.3893e-09	3.8138e-08	5.7145e-08
13.3333	0	0	3.7606e-09	3.0437e-08	5.0114e-08
13.6667	0	0	9.353e-10	2.3534e-08	4.3518e-08
14	0	0	0	1.736e-08	3.7368e-08
