# Supplementary material for: Noncovalent antibody catenation on a target surface greatly increases the antigen-binding avidity
Source: eLife. 2023 May 30;12:e81646. doi: 10.7554/eLife.81646 (PMC10229114; doi:10.7554/eLife.81646)
Supplement: Figure 3—source data 1. [file elife-81646-fig3-data1.xlsx]

## Sheet: Data1_individual_simulations
Square
kD_catenator	Binding Occupancy
1e-11	0.8673
1.4251e-11	0.9184
2.0309e-11	0.8571
2.8943e-11	0.9082
4.1246e-11	0.8878
5.878e-11	0.9082
8.3768e-11	0.9184
1.1938e-10	0.8469
1.7013e-10	0.8776
2.4245e-10	0.8673
3.4551e-10	0.898
4.9239e-10	0.8571
7.017e-10	0.8776
1e-09	0.8571
1.4251e-09	0.8878
2.0309e-09	0.898
2.8943e-09	0.8061
4.1246e-09	0.5408
5.878e-09	0.602
8.3768e-09	0.5612
1.1938e-08	0.3878
1.7013e-08	0.2755
2.4245e-08	0.1735
3.4551e-08	0.1327
4.9239e-08	0.1122
7.017e-08	0.0816
1e-07	0.1327
1.4251e-07	0.0612
2.0309e-07	0.0612
2.8943e-07	0.0612
4.1246e-07	0.1122
5.878e-07	0.1122
8.3768e-07	0.1224
1.1938e-06	0.1122
1.7013e-06	0.0918
2.4245e-06	0.1122
3.4551e-06	0.102
4.9239e-06	0.0204
7.017e-06	0.1429
1e-05	0.0918
1e-11	0.898
1.4251e-11	0.898
2.0309e-11	0.9184
2.8943e-11	0.898
4.1246e-11	0.8571
5.878e-11	0.8469
8.3768e-11	0.8878
1.1938e-10	0.8673
1.7013e-10	0.8469
2.4245e-10	0.9286
3.4551e-10	0.8469
4.9239e-10	0.898
7.017e-10	0.8163
1e-09	0.9286
1.4251e-09	0.8878
2.0309e-09	0.7857
2.8943e-09	0.7449
4.1246e-09	0.6939
5.878e-09	0.602
8.3768e-09	0.4082
1.1938e-08	0.4184
1.7013e-08	0.1735
2.4245e-08	0.1633
3.4551e-08	0.2143
4.9239e-08	0.1122
7.017e-08	0.1122
1e-07	0.0816
1.4251e-07	0.0918
2.0309e-07	0.0918
2.8943e-07	0.0816
4.1246e-07	0.0918
5.878e-07	0.102
8.3768e-07	0.1122
1.1938e-06	0.0816
1.7013e-06	0.0918
2.4245e-06	0.0816
3.4551e-06	0.0102
4.9239e-06	0.1122
7.017e-06	0.102
1e-05	0.051
1e-11	0.8673
1.4251e-11	0.898
2.0309e-11	0.9082
2.8943e-11	0.898
4.1246e-11	0.7551
5.878e-11	0.8469
8.3768e-11	0.8469
1.1938e-10	0.898
1.7013e-10	0.8673
2.4245e-10	0.949
3.4551e-10	0.9184
4.9239e-10	0.8776
7.017e-10	0.9082
1e-09	0.8878
1.4251e-09	0.8469
2.0309e-09	0.8265
2.8943e-09	0.8367
4.1246e-09	0.6735
5.878e-09	0.6429
8.3768e-09	0.6122
1.1938e-08	0.2347
1.7013e-08	0.2449
2.4245e-08	0.1735
3.4551e-08	0.051
4.9239e-08	0.102
7.017e-08	0.1327
1e-07	0.1122
1.4251e-07	0.1224
2.0309e-07	0.0714
2.8943e-07	0.0714
4.1246e-07	0.102
5.878e-07	0.1224
8.3768e-07	0.0816
1.1938e-06	0.102
1.7013e-06	0.0612
2.4245e-06	0.102
3.4551e-06	0.0612
4.9239e-06	0.1224
7.017e-06	0.1122
1e-05	0.1429
1e-11	0.9082
1.4251e-11	0.8776
2.0309e-11	0.8571
2.8943e-11	0.8776
4.1246e-11	0.8163
5.878e-11	0.8878
8.3768e-11	0.8878
1.1938e-10	0.898
1.7013e-10	0.7857
2.4245e-10	0.8878
3.4551e-10	0.8469
4.9239e-10	0.898
7.017e-10	0.9082
1e-09	0.898
1.4251e-09	0.7653
2.0309e-09	0.8469
2.8943e-09	0.898
4.1246e-09	0.7143
5.878e-09	0.5408
8.3768e-09	0.4286
1.1938e-08	0.3469
1.7013e-08	0.2653
2.4245e-08	0.2551
3.4551e-08	0.0918
4.9239e-08	0.0918
7.017e-08	0.1837
1e-07	0.051
1.4251e-07	0.102
2.0309e-07	0.0918
2.8943e-07	0.1122
4.1246e-07	0.1224
5.878e-07	0.1429
8.3768e-07	0.0918
1.1938e-06	0.0714
1.7013e-06	0.0408
2.4245e-06	0.0612
3.4551e-06	0.1224
4.9239e-06	0.0918
7.017e-06	0.051
1e-05	0.1327
1e-11	0.8469
1.4251e-11	0.8776
2.0309e-11	0.8776
2.8943e-11	0.9286
4.1246e-11	0.8673
5.878e-11	0.8265
8.3768e-11	0.8367
1.1938e-10	0.8878
1.7013e-10	0.8776
2.4245e-10	0.8776
3.4551e-10	0.8571
4.9239e-10	0.9082
7.017e-10	0.8673
1e-09	0.8469
1.4251e-09	0.8571
2.0309e-09	0.8367
2.8943e-09	0.8061
4.1246e-09	0.7347
5.878e-09	0.5612
8.3768e-09	0.4592
1.1938e-08	0.2653
1.7013e-08	0.3163
2.4245e-08	0.1429
3.4551e-08	0.1735
4.9239e-08	0.102
7.017e-08	0.0816
1e-07	0.1735
1.4251e-07	0.0918
2.0309e-07	0.1122
2.8943e-07	0.1122
4.1246e-07	0.102
5.878e-07	0.0612
8.3768e-07	0.1531
1.1938e-06	0.0714
1.7013e-06	0.0408
2.4245e-06	0.1122
3.4551e-06	0.1122
4.9239e-06	0.0918
7.017e-06	0.1122
1e-05	0.1122
1e-11	0.8265
1.4251e-11	0.8265
2.0309e-11	0.8878
2.8943e-11	0.8571
4.1246e-11	0.8163
5.878e-11	0.8776
8.3768e-11	0.8673
1.1938e-10	0.9082
1.7013e-10	0.898
2.4245e-10	0.8878
3.4551e-10	0.8367
4.9239e-10	0.9082
7.017e-10	0.8163
1e-09	0.8878
1.4251e-09	0.8163
2.0309e-09	0.898
2.8943e-09	0.7653
4.1246e-09	0.7653
5.878e-09	0.6531
8.3768e-09	0.3673
1.1938e-08	0.2857
1.7013e-08	0.2041
2.4245e-08	0.1224
3.4551e-08	0.0918
4.9239e-08	0.1224
7.017e-08	0.102
1e-07	0.1633
1.4251e-07	0.0714
2.0309e-07	0.051
2.8943e-07	0.0714
4.1246e-07	0.102
5.878e-07	0.1224
8.3768e-07	0.1224
1.1938e-06	0.0918
1.7013e-06	0.0612
2.4245e-06	0.102
3.4551e-06	0.1224
4.9239e-06	0.102
7.017e-06	0.0918
1e-05	0.0714
1e-11	0.8878
1.4251e-11	0.8673
2.0309e-11	0.8265
2.8943e-11	0.8878
4.1246e-11	0.9286
5.878e-11	0.898
8.3768e-11	0.9388
1.1938e-10	0.8265
1.7013e-10	0.8878
2.4245e-10	0.898
3.4551e-10	0.8061
4.9239e-10	0.9388
7.017e-10	0.898
1e-09	0.8571
1.4251e-09	0.8367
2.0309e-09	0.8571
2.8943e-09	0.7653
4.1246e-09	0.6939
5.878e-09	0.551
8.3768e-09	0.449
1.1938e-08	0.3061
1.7013e-08	0.2755
2.4245e-08	0.3163
3.4551e-08	0.0714
4.9239e-08	0.1633
7.017e-08	0.1122
1e-07	0.0918
1.4251e-07	0.102
2.0309e-07	0.102
2.8943e-07	0.1327
4.1246e-07	0.0714
5.878e-07	0.0816
8.3768e-07	0.051
1.1938e-06	0.102
1.7013e-06	0.1224
2.4245e-06	0.0816
3.4551e-06	0.0408
4.9239e-06	0.1939
7.017e-06	0.0816
1e-05	0.051
1e-11	0.8776
1.4251e-11	0.8061
2.0309e-11	0.8061
2.8943e-11	0.8878
4.1246e-11	0.8673
5.878e-11	0.898
8.3768e-11	0.8367
1.1938e-10	0.8469
1.7013e-10	0.9286
2.4245e-10	0.8469
3.4551e-10	0.8469
4.9239e-10	0.9286
7.017e-10	0.8878
1e-09	0.9286
1.4251e-09	0.8469
2.0309e-09	0.8469
2.8943e-09	0.8163
4.1246e-09	0.6837
5.878e-09	0.6837
8.3768e-09	0.3469
1.1938e-08	0.3061
1.7013e-08	0.2245
2.4245e-08	0.2143
3.4551e-08	0.1429
4.9239e-08	0.1429
7.017e-08	0.102
1e-07	0.1837
1.4251e-07	0.0714
2.0309e-07	0.102
2.8943e-07	0.1531
4.1246e-07	0.102
5.878e-07	0.1224
8.3768e-07	0.0816
1.1938e-06	0.0612
1.7013e-06	0.0714
2.4245e-06	0.1122
3.4551e-06	0.0612
4.9239e-06	0.0816
7.017e-06	0.102
1e-05	0.0918
1e-11	0.8163
1.4251e-11	0.898
2.0309e-11	0.8265
2.8943e-11	0.8673
4.1246e-11	0.8571
5.878e-11	0.898
8.3768e-11	0.9286
1.1938e-10	0.8367
1.7013e-10	0.9184
2.4245e-10	0.898
3.4551e-10	0.8571
4.9239e-10	0.898
7.017e-10	0.9082
1e-09	0.8061
1.4251e-09	0.8571
2.0309e-09	0.8673
2.8943e-09	0.7857
4.1246e-09	0.7551
5.878e-09	0.5306
8.3768e-09	0.5102
1.1938e-08	0.2653
1.7013e-08	0.2449
2.4245e-08	0.2449
3.4551e-08	0.1429
4.9239e-08	0.1224
7.017e-08	0.0408
1e-07	0.0714
1.4251e-07	0.1327
2.0309e-07	0.0816
2.8943e-07	0.0714
4.1246e-07	0.102
5.878e-07	0.0408
8.3768e-07	0.051
1.1938e-06	0.0816
1.7013e-06	0.0918
2.4245e-06	0.102
3.4551e-06	0.0408
4.9239e-06	0.1122
7.017e-06	0.102
1e-05	0.1531
1e-11	0.9286
1.4251e-11	0.8265
2.0309e-11	0.8673
2.8943e-11	0.8776
4.1246e-11	0.9184
5.878e-11	0.7959
8.3768e-11	0.949
1.1938e-10	0.9286
1.7013e-10	0.7959
2.4245e-10	0.8163
3.4551e-10	0.9184
4.9239e-10	0.8878
7.017e-10	0.898
1e-09	0.9082
1.4251e-09	0.9082
2.0309e-09	0.8673
2.8943e-09	0.7653
4.1246e-09	0.7755
5.878e-09	0.6939
8.3768e-09	0.5714
1.1938e-08	0.3265
1.7013e-08	0.2041
2.4245e-08	0.0918
3.4551e-08	0.1633
4.9239e-08	0.1531
7.017e-08	0.1837
1e-07	0.0306
1.4251e-07	0.0714
2.0309e-07	0.0714
2.8943e-07	0.102
4.1246e-07	0.1122
5.878e-07	0.0918
8.3768e-07	0.1224
1.1938e-06	0.1122
1.7013e-06	0.1122
2.4245e-06	0.051
3.4551e-06	0.0918
4.9239e-06	0.0714
7.017e-06	0.1224
1e-05	0.1224
1e-11	0.8571
1.4251e-11	0.9082
2.0309e-11	0.9082
2.8943e-11	0.8061
4.1246e-11	0.9082
5.878e-11	0.8776
8.3768e-11	0.8367
1.1938e-10	0.8878
1.7013e-10	0.898
2.4245e-10	0.8776
3.4551e-10	0.8367
4.9239e-10	0.9082
7.017e-10	0.8367
1e-09	0.9082
1.4251e-09	0.9082
2.0309e-09	0.8571
2.8943e-09	0.7449
4.1246e-09	0.7755
5.878e-09	0.6633
8.3768e-09	0.5204
1.1938e-08	0.3673
1.7013e-08	0.2551
2.4245e-08	0.0816
3.4551e-08	0.0918
4.9239e-08	0.1327
7.017e-08	0.1224
1e-07	0.0918
1.4251e-07	0.102
2.0309e-07	0.1122
2.8943e-07	0.0918
4.1246e-07	0.0918
5.878e-07	0.0816
8.3768e-07	0.0612
1.1938e-06	0.051
1.7013e-06	0.1224
2.4245e-06	0.102
3.4551e-06	0.1122
4.9239e-06	0.1122
7.017e-06	0.1122
1e-05	0.0918
1e-11	0.7959
1.4251e-11	0.8673
2.0309e-11	0.8776
2.8943e-11	0.8571
4.1246e-11	0.8776
5.878e-11	0.8878
8.3768e-11	0.8878
1.1938e-10	0.898
1.7013e-10	0.9082
2.4245e-10	0.8776
3.4551e-10	0.8673
4.9239e-10	0.9082
7.017e-10	0.8776
1e-09	0.9286
1.4251e-09	0.8571
2.0309e-09	0.8776
2.8943e-09	0.7959
4.1246e-09	0.6939
5.878e-09	0.6122
8.3768e-09	0.5714
1.1938e-08	0.398
1.7013e-08	0.2347
2.4245e-08	0.1429
3.4551e-08	0.1735
4.9239e-08	0.1327
7.017e-08	0.0816
1e-07	0.1327
1.4251e-07	0.1122
2.0309e-07	0.0714
2.8943e-07	0.0306
4.1246e-07	0.0918
5.878e-07	0.0714
8.3768e-07	0.0612
1.1938e-06	0.1633
1.7013e-06	0.0714
2.4245e-06	0.1122
3.4551e-06	0.0816
4.9239e-06	0.1327
7.017e-06	0.0918
1e-05	0.0816
1e-11	0.8571
1.4251e-11	0.8571
2.0309e-11	0.8061
2.8943e-11	0.9694
4.1246e-11	0.8878
5.878e-11	0.9286
8.3768e-11	0.8878
1.1938e-10	0.8878
1.7013e-10	0.8878
2.4245e-10	0.8469
3.4551e-10	0.8061
4.9239e-10	0.8673
7.017e-10	0.898
1e-09	0.9184
1.4251e-09	0.8776
2.0309e-09	0.8469
2.8943e-09	0.7551
4.1246e-09	0.6939
5.878e-09	0.6939
8.3768e-09	0.5306
1.1938e-08	0.3061
1.7013e-08	0.2449
2.4245e-08	0.1224
3.4551e-08	0.0816
4.9239e-08	0.0918
7.017e-08	0.102
1e-07	0.0714
1.4251e-07	0.0816
2.0309e-07	0.102
2.8943e-07	0.051
4.1246e-07	0.1122
5.878e-07	0.0714
8.3768e-07	0.102
1.1938e-06	0.102
1.7013e-06	0.0918
2.4245e-06	0.0816
3.4551e-06	0.0918
4.9239e-06	0.051
7.017e-06	0.102
1e-05	0.0306
1e-11	0.8571
1.4251e-11	0.7755
2.0309e-11	0.949
2.8943e-11	0.8776
4.1246e-11	0.898
5.878e-11	0.8571
8.3768e-11	0.8878
1.1938e-10	0.8571
1.7013e-10	0.8673
2.4245e-10	0.9082
3.4551e-10	0.8571
4.9239e-10	0.8469
7.017e-10	0.9082
1e-09	0.8878
1.4251e-09	0.8673
2.0309e-09	0.7755
2.8943e-09	0.7857
4.1246e-09	0.6224
5.878e-09	0.6327
8.3768e-09	0.4796
1.1938e-08	0.3571
1.7013e-08	0.1327
2.4245e-08	0.1429
3.4551e-08	0.0816
4.9239e-08	0.1224
7.017e-08	0.0714
1e-07	0.102
1.4251e-07	0.0714
2.0309e-07	0.0714
2.8943e-07	0.0918
4.1246e-07	0.0612
5.878e-07	0.1224
8.3768e-07	0.0918
1.1938e-06	0.0816
1.7013e-06	0.1327
2.4245e-06	0.0714
3.4551e-06	0.0816
4.9239e-06	0.0612
7.017e-06	0.1429
1e-05	0.051
1e-11	0.9898
1.4251e-11	0.8265
2.0309e-11	0.8673
2.8943e-11	0.9184
4.1246e-11	0.9082
5.878e-11	0.8878
8.3768e-11	0.8571
1.1938e-10	0.8265
1.7013e-10	0.8571
2.4245e-10	0.9286
3.4551e-10	0.8878
4.9239e-10	0.9184
7.017e-10	0.9082
1e-09	0.8469
1.4251e-09	0.8878
2.0309e-09	0.8163
2.8943e-09	0.7653
4.1246e-09	0.7245
5.878e-09	0.6939
8.3768e-09	0.5408
1.1938e-08	0.2449
1.7013e-08	0.2653
2.4245e-08	0.1633
3.4551e-08	0.0816
4.9239e-08	0.102
7.017e-08	0.1531
1e-07	0.1531
1.4251e-07	0.0714
2.0309e-07	0.102
2.8943e-07	0.0918
4.1246e-07	0.1122
5.878e-07	0.1122
8.3768e-07	0.1327
1.1938e-06	0.102
1.7013e-06	0.102
2.4245e-06	0.102
3.4551e-06	0.0714
4.9239e-06	0.0816
7.017e-06	0.0612
1e-05	0.0714
1e-11	0.9388
1.4251e-11	0.898
2.0309e-11	0.8367
2.8943e-11	0.8673
4.1246e-11	0.8673
5.878e-11	0.9286
8.3768e-11	0.8265
1.1938e-10	0.898
1.7013e-10	0.8776
2.4245e-10	0.8571
3.4551e-10	0.8878
4.9239e-10	0.9286
7.017e-10	0.8776
1e-09	0.8265
1.4251e-09	0.8061
2.0309e-09	0.9082
2.8943e-09	0.7959
4.1246e-09	0.7041
5.878e-09	0.6837
8.3768e-09	0.5612
1.1938e-08	0.2347
1.7013e-08	0.1837
2.4245e-08	0.1531
3.4551e-08	0.2245
4.9239e-08	0.1327
7.017e-08	0.1429
1e-07	0.1224
1.4251e-07	0.051
2.0309e-07	0.1122
2.8943e-07	0.0816
4.1246e-07	0.102
5.878e-07	0.1327
8.3768e-07	0.1327
1.1938e-06	0.0612
1.7013e-06	0.1327
2.4245e-06	0.0918
3.4551e-06	0.0714
4.9239e-06	0.0918
7.017e-06	0.0918
1e-05	0.1327
1e-11	0.8673
1.4251e-11	0.9082
2.0309e-11	0.8367
2.8943e-11	0.898
4.1246e-11	0.9082
5.878e-11	0.9694
8.3768e-11	0.9082
1.1938e-10	0.898
1.7013e-10	0.8776
2.4245e-10	0.8469
3.4551e-10	0.898
4.9239e-10	0.8367
7.017e-10	0.898
1e-09	0.8571
1.4251e-09	0.8163
2.0309e-09	0.8878
2.8943e-09	0.8469
4.1246e-09	0.7755
5.878e-09	0.602
8.3768e-09	0.5
1.1938e-08	0.3571
1.7013e-08	0.1531
2.4245e-08	0.102
3.4551e-08	0.1327
4.9239e-08	0.0816
7.017e-08	0.0714
1e-07	0.1224
1.4251e-07	0.102
2.0309e-07	0.0918
2.8943e-07	0.1224
4.1246e-07	0.0612
5.878e-07	0.1122
8.3768e-07	0.0612
1.1938e-06	0.0816
1.7013e-06	0.0612
2.4245e-06	0.1224
3.4551e-06	0.102
4.9239e-06	0.102
7.017e-06	0.1122
1e-05	0.0408
1e-11	0.8163
1.4251e-11	0.8776
2.0309e-11	0.9184
2.8943e-11	0.8367
4.1246e-11	0.9082
5.878e-11	0.9184
8.3768e-11	0.8367
1.1938e-10	0.9184
1.7013e-10	0.8265
2.4245e-10	0.8469
3.4551e-10	0.8367
4.9239e-10	0.8878
7.017e-10	0.8367
1e-09	0.8469
1.4251e-09	0.8571
2.0309e-09	0.8265
2.8943e-09	0.7347
4.1246e-09	0.7143
5.878e-09	0.6327
8.3768e-09	0.449
1.1938e-08	0.3776
1.7013e-08	0.1429
2.4245e-08	0.1633
3.4551e-08	0.0306
4.9239e-08	0.0612
7.017e-08	0.0714
1e-07	0.0816
1.4251e-07	0.0714
2.0309e-07	0.102
2.8943e-07	0.0918
4.1246e-07	0.0918
5.878e-07	0.0714
8.3768e-07	0.0612
1.1938e-06	0.0714
1.7013e-06	0.102
2.4245e-06	0.1224
3.4551e-06	0.102
4.9239e-06	0.051
7.017e-06	0.0612
1e-05	0.0408
1e-11	0.9184
1.4251e-11	0.8878
2.0309e-11	0.8571
2.8943e-11	0.9592
4.1246e-11	0.9592
5.878e-11	0.9388
8.3768e-11	0.898
1.1938e-10	0.8571
1.7013e-10	0.949
2.4245e-10	0.8571
3.4551e-10	0.8571
4.9239e-10	0.898
7.017e-10	0.898
1e-09	0.8469
1.4251e-09	0.7857
2.0309e-09	0.7755
2.8943e-09	0.7755
4.1246e-09	0.7551
5.878e-09	0.6429
8.3768e-09	0.4592
1.1938e-08	0.3367
1.7013e-08	0.1837
2.4245e-08	0.0918
3.4551e-08	0.0408
4.9239e-08	0.0408
7.017e-08	0.102
1e-07	0.1122
1.4251e-07	0.1122
2.0309e-07	0.1327
2.8943e-07	0.1429
4.1246e-07	0.0306
5.878e-07	0.0918
8.3768e-07	0.1735
1.1938e-06	0.102
1.7013e-06	0.0612
2.4245e-06	0.102
3.4551e-06	0.1122
4.9239e-06	0.0816
7.017e-06	0.051
1e-05	0.051
1e-11	0.9082
1.4251e-11	0.8163
2.0309e-11	0.8571
2.8943e-11	0.898
4.1246e-11	0.8878
5.878e-11	0.8571
8.3768e-11	0.9184
1.1938e-10	0.9184
1.7013e-10	0.8673
2.4245e-10	0.9082
3.4551e-10	0.8163
4.9239e-10	0.8673
7.017e-10	0.8571
1e-09	0.8571
1.4251e-09	0.8673
2.0309e-09	0.8776
2.8943e-09	0.7755
4.1246e-09	0.7347
5.878e-09	0.6531
8.3768e-09	0.5102
1.1938e-08	0.3878
1.7013e-08	0.2551
2.4245e-08	0.0918
3.4551e-08	0.1327
4.9239e-08	0.1633
7.017e-08	0.1224
1e-07	0.0612
1.4251e-07	0.0816
2.0309e-07	0.0714
2.8943e-07	0.0408
4.1246e-07	0.051
5.878e-07	0.0612
8.3768e-07	0.1122
1.1938e-06	0.0918
1.7013e-06	0.0714
2.4245e-06	0.0714
3.4551e-06	0.0918
4.9239e-06	0.0306
7.017e-06	0.0714
1e-05	0.0612
1e-11	0.8878
1.4251e-11	0.8673
2.0309e-11	0.9286
2.8943e-11	0.8061
4.1246e-11	0.9388
5.878e-11	0.898
8.3768e-11	0.8776
1.1938e-10	0.8571
1.7013e-10	0.9082
2.4245e-10	0.898
3.4551e-10	0.8776
4.9239e-10	0.9184
7.017e-10	0.8878
1e-09	0.8776
1.4251e-09	0.8061
2.0309e-09	0.8265
2.8943e-09	0.8163
4.1246e-09	0.8163
5.878e-09	0.6939
8.3768e-09	0.6633
1.1938e-08	0.2959
1.7013e-08	0.2551
2.4245e-08	0.1122
3.4551e-08	0.102
4.9239e-08	0.0714
7.017e-08	0.0408
1e-07	0.1327
1.4251e-07	0.0714
2.0309e-07	0.0918
2.8943e-07	0.0918
4.1246e-07	0.1122
5.878e-07	0.0918
8.3768e-07	0.1429
1.1938e-06	0.1327
1.7013e-06	0.0714
2.4245e-06	0.102
3.4551e-06	0.1327
4.9239e-06	0.0918
7.017e-06	0.0612
1e-05	0.0816
1e-11	0.8673
1.4251e-11	0.9286
2.0309e-11	0.8673
2.8943e-11	0.8571
4.1246e-11	0.9184
5.878e-11	0.7959
8.3768e-11	0.8673
1.1938e-10	0.8571
1.7013e-10	0.8571
2.4245e-10	0.8776
3.4551e-10	0.8265
4.9239e-10	0.9082
7.017e-10	0.8163
1e-09	0.8878
1.4251e-09	0.898
2.0309e-09	0.7959
2.8943e-09	0.7449
4.1246e-09	0.7755
5.878e-09	0.6429
8.3768e-09	0.4184
1.1938e-08	0.4184
1.7013e-08	0.2245
2.4245e-08	0.1531
3.4551e-08	0.1531
4.9239e-08	0.1429
7.017e-08	0.0918
1e-07	0.1122
1.4251e-07	0.1224
2.0309e-07	0.0408
2.8943e-07	0.0816
4.1246e-07	0.1224
5.878e-07	0.0816
8.3768e-07	0.0612
1.1938e-06	0.1327
1.7013e-06	0.0714
2.4245e-06	0.102
3.4551e-06	0.102
4.9239e-06	0.1122
7.017e-06	0.0612
1e-05	0.0816
1e-11	0.898
1.4251e-11	0.8469
2.0309e-11	0.8367
2.8943e-11	0.8776
4.1246e-11	0.9184
5.878e-11	0.8878
8.3768e-11	0.9082
1.1938e-10	0.8163
1.7013e-10	0.8571
2.4245e-10	0.898
3.4551e-10	0.9082
4.9239e-10	0.9592
7.017e-10	0.898
1e-09	0.8878
1.4251e-09	0.898
2.0309e-09	0.8673
2.8943e-09	0.9082
4.1246e-09	0.7653
5.878e-09	0.6939
8.3768e-09	0.5204
1.1938e-08	0.3163
1.7013e-08	0.2449
2.4245e-08	0.1531
3.4551e-08	0.1327
4.9239e-08	0.1224
7.017e-08	0.0918
1e-07	0.1122
1.4251e-07	0.1429
2.0309e-07	0.1224
2.8943e-07	0.1327
4.1246e-07	0.102
5.878e-07	0.102
8.3768e-07	0.0204
1.1938e-06	0.0918
1.7013e-06	0.0714
2.4245e-06	0.0918
3.4551e-06	0.1327
4.9239e-06	0.0918
7.017e-06	0.0816
1e-05	0.1122
1e-11	0.7959
1.4251e-11	0.8776
2.0309e-11	0.8776
2.8943e-11	0.8163
4.1246e-11	0.9184
5.878e-11	0.8878
8.3768e-11	0.8776
1.1938e-10	0.9592
1.7013e-10	0.9388
2.4245e-10	0.8367
3.4551e-10	0.8673
4.9239e-10	0.9286
7.017e-10	0.8776
1e-09	0.8673
1.4251e-09	0.8367
2.0309e-09	0.8571
2.8943e-09	0.7551
4.1246e-09	0.7755
5.878e-09	0.6633
8.3768e-09	0.6224
1.1938e-08	0.2857
1.7013e-08	0.1531
2.4245e-08	0.1939
3.4551e-08	0.1429
4.9239e-08	0.1327
7.017e-08	0.102
1e-07	0.0918
1.4251e-07	0.2041
2.0309e-07	0.1224
2.8943e-07	0.1633
4.1246e-07	0.102
5.878e-07	0.1633
8.3768e-07	0.0816
1.1938e-06	0.0714
1.7013e-06	0.0612
2.4245e-06	0.0816
3.4551e-06	0.1122
4.9239e-06	0.0408
7.017e-06	0.0918
1e-05	0.0816
1e-11	0.8469
1.4251e-11	0.9796
2.0309e-11	0.8673
2.8943e-11	0.8673
4.1246e-11	0.8878
5.878e-11	0.8571
8.3768e-11	0.9082
1.1938e-10	0.9184
1.7013e-10	0.898
2.4245e-10	0.8469
3.4551e-10	0.7857
4.9239e-10	0.8878
7.017e-10	0.949
1e-09	0.8776
1.4251e-09	0.9694
2.0309e-09	0.8367
2.8943e-09	0.8673
4.1246e-09	0.6939
5.878e-09	0.5306
8.3768e-09	0.4592
1.1938e-08	0.3367
1.7013e-08	0.2245
2.4245e-08	0.1837
3.4551e-08	0.1122
4.9239e-08	0.1122
7.017e-08	0.102
1e-07	0.1429
1.4251e-07	0.1531
2.0309e-07	0.0408
2.8943e-07	0.0816
4.1246e-07	0.0714
5.878e-07	0.1327
8.3768e-07	0.0612
1.1938e-06	0.102
1.7013e-06	0.0816
2.4245e-06	0.0816
3.4551e-06	0.051
4.9239e-06	0.0612
7.017e-06	0.102
1e-05	0.051
