# Supplementary material for: Noncovalent antibody catenation on a target surface greatly increases the antigen-binding avidity
Source: eLife. 2023 May 30;12:e81646. doi: 10.7554/eLife.81646 (PMC10229114; doi:10.7554/eLife.81646)
Supplement: Figure 4—figure supplement 1—source data 1. [file elife-81646-fig4-figsupp1-data1.xlsx]

## Sheet: Supple2_higher_densities_BO
p=14.7 per 7 x 7 nm2		p=29.4 per 7 x 7 nm2		p=44.1 per 7 x 7 nm2		p=58.8 per 7 x 7 nm2		Control
kD_catenator	Binding Occupancy	kD_catenator	Binding Occupancy	kD_catenator	Binding Occupancy	kD_catenator	Binding Occupancy	kD_catenator	Binding Occupancy
1e-08	0.986	1e-08	0.9926	1e-08	0.995	1e-08	0.9968	1e-08	0.1
1.4251e-08	0.9869	1.4251e-08	0.9933	1.4251e-08	0.9955	1.4251e-08	0.9971	0.00025642	0.1
2.0309e-08	0.9883	2.0309e-08	0.994	2.0309e-08	0.9959	2.0309e-08	0.9973	0.00051283	0.1
2.8943e-08	0.9896	2.8943e-08	0.9948	2.8943e-08	0.9965	2.8943e-08	0.9977	0.00076924	0.1
4.1246e-08	0.9911	4.1246e-08	0.9955	4.1246e-08	0.997	4.1246e-08	0.9981	0.001	0.1
5.878e-08	0.9925	5.878e-08	0.9964	5.878e-08	0.9975	5.878e-08	0.9986	0.0013	0.1
8.3768e-08	0.994	8.3768e-08	0.9972	8.3768e-08	0.9981	8.3768e-08	0.999	0.0015	0.1
1.1938e-07	0.9953	1.1938e-07	0.9978	1.1938e-07	0.9987	1.1938e-07	0.9994	0.0018	0.1
1.7013e-07	0.9965	1.7013e-07	0.9984	1.7013e-07	0.9991	1.7013e-07	0.9996	0.0021	0.1
2.4245e-07	0.9972	2.4245e-07	0.9989	2.4245e-07	0.9993	2.4245e-07	0.9997	0.0023	0.1
3.4551e-07	0.9977	3.4551e-07	0.999	3.4551e-07	0.9994	3.4551e-07	0.9996	0.0026	0.1
4.9239e-07	0.9976	4.9239e-07	0.9989	4.9239e-07	0.9993	4.9239e-07	0.9996	0.0028	0.1
7.017e-07	0.9974	7.017e-07	0.9988	7.017e-07	0.9992	7.017e-07	0.9995	0.0031	0.1
1e-06	0.9967	1e-06	0.9985	1e-06	0.999	1e-06	0.9993	0.0033	0.1
1.4251e-06	0.9957	1.4251e-06	0.9979	1.4251e-06	0.9987	1.4251e-06	0.9991	0.0036	0.1
2.0309e-06	0.9943	2.0309e-06	0.9973	2.0309e-06	0.9982	2.0309e-06	0.9987	0.0038	0.1
2.8943e-06	0.9923	2.8943e-06	0.9963	2.8943e-06	0.9976	2.8943e-06	0.9982	0.0041	0.1
4.1246e-06	0.989	4.1246e-06	0.9949	4.1246e-06	0.9966	4.1246e-06	0.9974	0.0044	0.1
5.878e-06	0.9845	5.878e-06	0.9928	5.878e-06	0.9952	5.878e-06	0.9965	0.0046	0.1
8.3768e-06	0.9781	8.3768e-06	0.9899	8.3768e-06	0.9932	8.3768e-06	0.995	0.0049	0.1
1.1938e-05	0.969	1.1938e-05	0.9855	1.1938e-05	0.9904	1.1938e-05	0.9928	0.0051	0.1
1.7013e-05	0.956	1.7013e-05	0.9794	1.7013e-05	0.9862	1.7013e-05	0.9899	0.0054	0.1
2.4245e-05	0.9382	2.4245e-05	0.9706	2.4245e-05	0.9808	2.4245e-05	0.9858	0.0056	0.1
3.4551e-05	0.912	3.4551e-05	0.9585	3.4551e-05	0.9726	3.4551e-05	0.9795	0.0059	0.1
4.9239e-05	0.876	4.9239e-05	0.9414	4.9239e-05	0.9614	4.9239e-05	0.9711	0.0062	0.1
7.017e-05	0.8256	7.017e-05	0.9176	7.017e-05	0.9456	7.017e-05	0.9595	0.0064	0.1
0.0001	0.7559	0.0001	0.884	0.0001	0.9231	0.0001	0.9424	0.0067	0.1
0.00014251	0.659	0.00014251	0.8369	0.00014251	0.8921	0.00014251	0.9188	0.0069	0.1
0.00020309	0.5329	0.00020309	0.7724	0.00020309	0.8489	0.00020309	0.8869	0.0072	0.1
0.00028943	0.3856	0.00028943	0.6851	0.00028943	0.7883	0.00028943	0.841	0.0074	0.1
0.00041246	0.2593	0.00041246	0.5698	0.00041246	0.7078	0.00041246	0.7782	0.0077	0.1
0.0005878	0.183	0.0005878	0.431	0.0005878	0.6004	0.0005878	0.6939	0.0079	0.1
0.00083768	0.1426	0.00083768	0.2945	0.00083768	0.4666	0.00083768	0.5834	0.0082	0.1
0.0012	0.1221	0.0012	0.2012	0.0012	0.3281	0.0012	0.4489	0.0085	0.1
0.0017	0.1107	0.0017	0.1513	0.0017	0.2209	0.0017	0.3112	0.0087	0.1
0.0024	0.1033	0.0024	0.1268	0.0024	0.1616	0.0024	0.2113	0.009	0.1
0.0035	0.0988	0.0035	0.1128	0.0035	0.1311	0.0035	0.1561	0.0092	0.1
0.0049	0.0971	0.0049	0.105	0.0049	0.1159	0.0049	0.1288	0.0095	0.1
0.007	0.0942	0.007	0.1002	0.007	0.1065	0.007	0.114	0.0097	0.1
0.01	0.0939	0.01	0.0972	0.01	0.1017	0.01	0.1057	0.01	0.1
1e-11	0.898
1.4251e-11	0.898
2.0309e-11	0.9184
2.8943e-11	0.898
4.1246e-11	0.8571
5.878e-11	0.8469
8.3768e-11	0.8878
1.1938e-10	0.8673
1.7013e-10	0.8469
2.4245e-10	0.9286
3.4551e-10	0.8469
4.9239e-10	0.898
7.017e-10	0.8163
1e-09	0.9286
1.4251e-09	0.8878
2.0309e-09	0.7857
2.8943e-09	0.7449
4.1246e-09	0.6939
5.878e-09	0.602
8.3768e-09	0.4082
1.1938e-08	0.4184
1.7013e-08	0.1735
2.4245e-08	0.1633
3.4551e-08	0.2143
4.9239e-08	0.1122
7.017e-08	0.1122
1e-07	0.0816
1.4251e-07	0.0918
2.0309e-07	0.0918
2.8943e-07	0.0816
4.1246e-07	0.0918
5.878e-07	0.102
8.3768e-07	0.1122
1.1938e-06	0.0816
1.7013e-06	0.0918
2.4245e-06	0.0816
3.4551e-06	0.0102
4.9239e-06	0.1122
7.017e-06	0.102
1e-05	0.051
1e-11	0.8673
1.4251e-11	0.898
2.0309e-11	0.9082
2.8943e-11	0.898
4.1246e-11	0.7551
5.878e-11	0.8469
8.3768e-11	0.8469
1.1938e-10	0.898
1.7013e-10	0.8673
2.4245e-10	0.949
3.4551e-10	0.9184
4.9239e-10	0.8776
7.017e-10	0.9082
1e-09	0.8878
1.4251e-09	0.8469
2.0309e-09	0.8265
2.8943e-09	0.8367
4.1246e-09	0.6735
5.878e-09	0.6429
8.3768e-09	0.6122
1.1938e-08	0.2347
1.7013e-08	0.2449
2.4245e-08	0.1735
3.4551e-08	0.051
4.9239e-08	0.102
7.017e-08	0.1327
1e-07	0.1122
1.4251e-07	0.1224
2.0309e-07	0.0714
2.8943e-07	0.0714
4.1246e-07	0.102
5.878e-07	0.1224
8.3768e-07	0.0816
1.1938e-06	0.102
1.7013e-06	0.0612
2.4245e-06	0.102
3.4551e-06	0.0612
4.9239e-06	0.1224
7.017e-06	0.1122
1e-05	0.1429
1e-11	0.9082
1.4251e-11	0.8776
2.0309e-11	0.8571
2.8943e-11	0.8776
4.1246e-11	0.8163
5.878e-11	0.8878
8.3768e-11	0.8878
1.1938e-10	0.898
1.7013e-10	0.7857
2.4245e-10	0.8878
3.4551e-10	0.8469
4.9239e-10	0.898
7.017e-10	0.9082
1e-09	0.898
1.4251e-09	0.7653
2.0309e-09	0.8469
2.8943e-09	0.898
4.1246e-09	0.7143
5.878e-09	0.5408
8.3768e-09	0.4286
1.1938e-08	0.3469
1.7013e-08	0.2653
2.4245e-08	0.2551
3.4551e-08	0.0918
4.9239e-08	0.0918
7.017e-08	0.1837
1e-07	0.051
1.4251e-07	0.102
2.0309e-07	0.0918
2.8943e-07	0.1122
4.1246e-07	0.1224
5.878e-07	0.1429
8.3768e-07	0.0918
1.1938e-06	0.0714
1.7013e-06	0.0408
2.4245e-06	0.0612
3.4551e-06	0.1224
4.9239e-06	0.0918
7.017e-06	0.051
1e-05	0.1327
1e-11	0.8469
1.4251e-11	0.8776
2.0309e-11	0.8776
2.8943e-11	0.9286
4.1246e-11	0.8673
5.878e-11	0.8265
8.3768e-11	0.8367
1.1938e-10	0.8878
1.7013e-10	0.8776
2.4245e-10	0.8776
3.4551e-10	0.8571
4.9239e-10	0.9082
7.017e-10	0.8673
1e-09	0.8469
1.4251e-09	0.8571
2.0309e-09	0.8367
2.8943e-09	0.8061
4.1246e-09	0.7347
5.878e-09	0.5612
8.3768e-09	0.4592
1.1938e-08	0.2653
1.7013e-08	0.3163
2.4245e-08	0.1429
3.4551e-08	0.1735
4.9239e-08	0.102
7.017e-08	0.0816
1e-07	0.1735
1.4251e-07	0.0918
2.0309e-07	0.1122
2.8943e-07	0.1122
4.1246e-07	0.102
5.878e-07	0.0612
8.3768e-07	0.1531
1.1938e-06	0.0714
1.7013e-06	0.0408
2.4245e-06	0.1122
3.4551e-06	0.1122
4.9239e-06	0.0918
7.017e-06	0.1122
1e-05	0.1122
1e-11	0.8265
1.4251e-11	0.8265
2.0309e-11	0.8878
2.8943e-11	0.8571
4.1246e-11	0.8163
5.878e-11	0.8776
8.3768e-11	0.8673
1.1938e-10	0.9082
1.7013e-10	0.898
2.4245e-10	0.8878
3.4551e-10	0.8367
4.9239e-10	0.9082
7.017e-10	0.8163
1e-09	0.8878
1.4251e-09	0.8163
2.0309e-09	0.898
2.8943e-09	0.7653
4.1246e-09	0.7653
5.878e-09	0.6531
8.3768e-09	0.3673
1.1938e-08	0.2857
1.7013e-08	0.2041
2.4245e-08	0.1224
3.4551e-08	0.0918
4.9239e-08	0.1224
7.017e-08	0.102
1e-07	0.1633
1.4251e-07	0.0714
2.0309e-07	0.051
2.8943e-07	0.0714
4.1246e-07	0.102
5.878e-07	0.1224
8.3768e-07	0.1224
1.1938e-06	0.0918
1.7013e-06	0.0612
2.4245e-06	0.102
3.4551e-06	0.1224
4.9239e-06	0.102
7.017e-06	0.0918
1e-05	0.0714
1e-11	0.8878
1.4251e-11	0.8673
2.0309e-11	0.8265
2.8943e-11	0.8878
4.1246e-11	0.9286
5.878e-11	0.898
8.3768e-11	0.9388
1.1938e-10	0.8265
1.7013e-10	0.8878
2.4245e-10	0.898
3.4551e-10	0.8061
4.9239e-10	0.9388
7.017e-10	0.898
1e-09	0.8571
1.4251e-09	0.8367
2.0309e-09	0.8571
2.8943e-09	0.7653
4.1246e-09	0.6939
5.878e-09	0.551
8.3768e-09	0.449
1.1938e-08	0.3061
1.7013e-08	0.2755
2.4245e-08	0.3163
3.4551e-08	0.0714
4.9239e-08	0.1633
7.017e-08	0.1122
1e-07	0.0918
1.4251e-07	0.102
2.0309e-07	0.102
2.8943e-07	0.1327
4.1246e-07	0.0714
5.878e-07	0.0816
8.3768e-07	0.051
1.1938e-06	0.102
1.7013e-06	0.1224
2.4245e-06	0.0816
3.4551e-06	0.0408
4.9239e-06	0.1939
7.017e-06	0.0816
1e-05	0.051
1e-11	0.8776
1.4251e-11	0.8061
2.0309e-11	0.8061
2.8943e-11	0.8878
4.1246e-11	0.8673
5.878e-11	0.898
8.3768e-11	0.8367
1.1938e-10	0.8469
1.7013e-10	0.9286
2.4245e-10	0.8469
3.4551e-10	0.8469
4.9239e-10	0.9286
7.017e-10	0.8878
1e-09	0.9286
1.4251e-09	0.8469
2.0309e-09	0.8469
2.8943e-09	0.8163
4.1246e-09	0.6837
5.878e-09	0.6837
8.3768e-09	0.3469
1.1938e-08	0.3061
1.7013e-08	0.2245
2.4245e-08	0.2143
3.4551e-08	0.1429
4.9239e-08	0.1429
7.017e-08	0.102
1e-07	0.1837
1.4251e-07	0.0714
2.0309e-07	0.102
2.8943e-07	0.1531
4.1246e-07	0.102
5.878e-07	0.1224
8.3768e-07	0.0816
1.1938e-06	0.0612
1.7013e-06	0.0714
2.4245e-06	0.1122
3.4551e-06	0.0612
4.9239e-06	0.0816
7.017e-06	0.102
1e-05	0.0918
1e-11	0.8163
1.4251e-11	0.898
2.0309e-11	0.8265
2.8943e-11	0.8673
4.1246e-11	0.8571
5.878e-11	0.898
8.3768e-11	0.9286
1.1938e-10	0.8367
1.7013e-10	0.9184
2.4245e-10	0.898
3.4551e-10	0.8571
4.9239e-10	0.898
7.017e-10	0.9082
1e-09	0.8061
1.4251e-09	0.8571
2.0309e-09	0.8673
2.8943e-09	0.7857
4.1246e-09	0.7551
5.878e-09	0.5306
8.3768e-09	0.5102
1.1938e-08	0.2653
1.7013e-08	0.2449
2.4245e-08	0.2449
3.4551e-08	0.1429
4.9239e-08	0.1224
7.017e-08	0.0408
1e-07	0.0714
1.4251e-07	0.1327
2.0309e-07	0.0816
2.8943e-07	0.0714
4.1246e-07	0.102
5.878e-07	0.0408
8.3768e-07	0.051
1.1938e-06	0.0816
1.7013e-06	0.0918
2.4245e-06	0.102
3.4551e-06	0.0408
4.9239e-06	0.1122
7.017e-06	0.102
1e-05	0.1531
1e-11	0.9286
1.4251e-11	0.8265
2.0309e-11	0.8673
2.8943e-11	0.8776
4.1246e-11	0.9184
5.878e-11	0.7959
8.3768e-11	0.949
1.1938e-10	0.9286
1.7013e-10	0.7959
2.4245e-10	0.8163
3.4551e-10	0.9184
4.9239e-10	0.8878
7.017e-10	0.898
1e-09	0.9082
1.4251e-09	0.9082
2.0309e-09	0.8673
2.8943e-09	0.7653
4.1246e-09	0.7755
5.878e-09	0.6939
8.3768e-09	0.5714
1.1938e-08	0.3265
1.7013e-08	0.2041
2.4245e-08	0.0918
3.4551e-08	0.1633
4.9239e-08	0.1531
7.017e-08	0.1837
1e-07	0.0306
1.4251e-07	0.0714
2.0309e-07	0.0714
2.8943e-07	0.102
4.1246e-07	0.1122
5.878e-07	0.0918
8.3768e-07	0.1224
1.1938e-06	0.1122
1.7013e-06	0.1122
2.4245e-06	0.051
3.4551e-06	0.0918
4.9239e-06	0.0714
7.017e-06	0.1224
1e-05	0.1224
1e-11	0.8571
1.4251e-11	0.9082
2.0309e-11	0.9082
2.8943e-11	0.8061
4.1246e-11	0.9082
5.878e-11	0.8776
8.3768e-11	0.8367
1.1938e-10	0.8878
1.7013e-10	0.898
2.4245e-10	0.8776
3.4551e-10	0.8367
4.9239e-10	0.9082
7.017e-10	0.8367
1e-09	0.9082
1.4251e-09	0.9082
2.0309e-09	0.8571
2.8943e-09	0.7449
4.1246e-09	0.7755
5.878e-09	0.6633
8.3768e-09	0.5204
1.1938e-08	0.3673
1.7013e-08	0.2551
2.4245e-08	0.0816
3.4551e-08	0.0918
4.9239e-08	0.1327
7.017e-08	0.1224
1e-07	0.0918
1.4251e-07	0.102
2.0309e-07	0.1122
2.8943e-07	0.0918
4.1246e-07	0.0918
5.878e-07	0.0816
8.3768e-07	0.0612
1.1938e-06	0.051
1.7013e-06	0.1224
2.4245e-06	0.102
3.4551e-06	0.1122
4.9239e-06	0.1122
7.017e-06	0.1122
1e-05	0.0918
1e-11	0.7959
1.4251e-11	0.8673
2.0309e-11	0.8776
2.8943e-11	0.8571
4.1246e-11	0.8776
5.878e-11	0.8878
8.3768e-11	0.8878
1.1938e-10	0.898
1.7013e-10	0.9082
2.4245e-10	0.8776
3.4551e-10	0.8673
4.9239e-10	0.9082
7.017e-10	0.8776
1e-09	0.9286
1.4251e-09	0.8571
2.0309e-09	0.8776
2.8943e-09	0.7959
4.1246e-09	0.6939
5.878e-09	0.6122
8.3768e-09	0.5714
1.1938e-08	0.398
1.7013e-08	0.2347
2.4245e-08	0.1429
3.4551e-08	0.1735
4.9239e-08	0.1327
7.017e-08	0.0816
1e-07	0.1327
1.4251e-07	0.1122
2.0309e-07	0.0714
2.8943e-07	0.0306
4.1246e-07	0.0918
5.878e-07	0.0714
8.3768e-07	0.0612
1.1938e-06	0.1633
1.7013e-06	0.0714
2.4245e-06	0.1122
3.4551e-06	0.0816
4.9239e-06	0.1327
7.017e-06	0.0918
1e-05	0.0816
1e-11	0.8571
1.4251e-11	0.8571
2.0309e-11	0.8061
2.8943e-11	0.9694
4.1246e-11	0.8878
5.878e-11	0.9286
8.3768e-11	0.8878
1.1938e-10	0.8878
1.7013e-10	0.8878
2.4245e-10	0.8469
3.4551e-10	0.8061
4.9239e-10	0.8673
7.017e-10	0.898
1e-09	0.9184
1.4251e-09	0.8776
2.0309e-09	0.8469
2.8943e-09	0.7551
4.1246e-09	0.6939
5.878e-09	0.6939
8.3768e-09	0.5306
1.1938e-08	0.3061
1.7013e-08	0.2449
2.4245e-08	0.1224
3.4551e-08	0.0816
4.9239e-08	0.0918
7.017e-08	0.102
1e-07	0.0714
1.4251e-07	0.0816
2.0309e-07	0.102
2.8943e-07	0.051
4.1246e-07	0.1122
5.878e-07	0.0714
8.3768e-07	0.102
1.1938e-06	0.102
1.7013e-06	0.0918
2.4245e-06	0.0816
3.4551e-06	0.0918
4.9239e-06	0.051
7.017e-06	0.102
1e-05	0.0306
1e-11	0.8571
1.4251e-11	0.7755
2.0309e-11	0.949
2.8943e-11	0.8776
4.1246e-11	0.898
5.878e-11	0.8571
8.3768e-11	0.8878
1.1938e-10	0.8571
1.7013e-10	0.8673
2.4245e-10	0.9082
3.4551e-10	0.8571
4.9239e-10	0.8469
7.017e-10	0.9082
1e-09	0.8878
1.4251e-09	0.8673
2.0309e-09	0.7755
2.8943e-09	0.7857
4.1246e-09	0.6224
5.878e-09	0.6327
8.3768e-09	0.4796
1.1938e-08	0.3571
1.7013e-08	0.1327
2.4245e-08	0.1429
3.4551e-08	0.0816
4.9239e-08	0.1224
7.017e-08	0.0714
1e-07	0.102
1.4251e-07	0.0714
2.0309e-07	0.0714
2.8943e-07	0.0918
4.1246e-07	0.0612
5.878e-07	0.1224
8.3768e-07	0.0918
1.1938e-06	0.0816
1.7013e-06	0.1327
2.4245e-06	0.0714
3.4551e-06	0.0816
4.9239e-06	0.0612
7.017e-06	0.1429
1e-05	0.051
1e-11	0.9898
1.4251e-11	0.8265
2.0309e-11	0.8673
2.8943e-11	0.9184
4.1246e-11	0.9082
5.878e-11	0.8878
8.3768e-11	0.8571
1.1938e-10	0.8265
1.7013e-10	0.8571
2.4245e-10	0.9286
3.4551e-10	0.8878
4.9239e-10	0.9184
7.017e-10	0.9082
1e-09	0.8469
1.4251e-09	0.8878
2.0309e-09	0.8163
2.8943e-09	0.7653
4.1246e-09	0.7245
5.878e-09	0.6939
8.3768e-09	0.5408
1.1938e-08	0.2449
1.7013e-08	0.2653
2.4245e-08	0.1633
3.4551e-08	0.0816
4.9239e-08	0.102
7.017e-08	0.1531
1e-07	0.1531
1.4251e-07	0.0714
2.0309e-07	0.102
2.8943e-07	0.0918
4.1246e-07	0.1122
5.878e-07	0.1122
8.3768e-07	0.1327
1.1938e-06	0.102
1.7013e-06	0.102
2.4245e-06	0.102
3.4551e-06	0.0714
4.9239e-06	0.0816
7.017e-06	0.0612
1e-05	0.0714
1e-11	0.9388
1.4251e-11	0.898
2.0309e-11	0.8367
2.8943e-11	0.8673
4.1246e-11	0.8673
5.878e-11	0.9286
8.3768e-11	0.8265
1.1938e-10	0.898
1.7013e-10	0.8776
2.4245e-10	0.8571
3.4551e-10	0.8878
4.9239e-10	0.9286
7.017e-10	0.8776
1e-09	0.8265
1.4251e-09	0.8061
2.0309e-09	0.9082
2.8943e-09	0.7959
4.1246e-09	0.7041
5.878e-09	0.6837
8.3768e-09	0.5612
1.1938e-08	0.2347
1.7013e-08	0.1837
2.4245e-08	0.1531
3.4551e-08	0.2245
4.9239e-08	0.1327
7.017e-08	0.1429
1e-07	0.1224
1.4251e-07	0.051
2.0309e-07	0.1122
2.8943e-07	0.0816
4.1246e-07	0.102
5.878e-07	0.1327
8.3768e-07	0.1327
1.1938e-06	0.0612
1.7013e-06	0.1327
2.4245e-06	0.0918
3.4551e-06	0.0714
4.9239e-06	0.0918
7.017e-06	0.0918
1e-05	0.1327
1e-11	0.8673
1.4251e-11	0.9082
2.0309e-11	0.8367
2.8943e-11	0.898
4.1246e-11	0.9082
5.878e-11	0.9694
8.3768e-11	0.9082
1.1938e-10	0.898
1.7013e-10	0.8776
2.4245e-10	0.8469
3.4551e-10	0.898
4.9239e-10	0.8367
7.017e-10	0.898
1e-09	0.8571
1.4251e-09	0.8163
2.0309e-09	0.8878
2.8943e-09	0.8469
4.1246e-09	0.7755
5.878e-09	0.602
8.3768e-09	0.5
1.1938e-08	0.3571
1.7013e-08	0.1531
2.4245e-08	0.102
3.4551e-08	0.1327
4.9239e-08	0.0816
7.017e-08	0.0714
1e-07	0.1224
1.4251e-07	0.102
2.0309e-07	0.0918
2.8943e-07	0.1224
4.1246e-07	0.0612
5.878e-07	0.1122
8.3768e-07	0.0612
1.1938e-06	0.0816
1.7013e-06	0.0612
2.4245e-06	0.1224
3.4551e-06	0.102
4.9239e-06	0.102
7.017e-06	0.1122
1e-05	0.0408
1e-11	0.8163
1.4251e-11	0.8776
2.0309e-11	0.9184
2.8943e-11	0.8367
4.1246e-11	0.9082
5.878e-11	0.9184
8.3768e-11	0.8367
1.1938e-10	0.9184
1.7013e-10	0.8265
2.4245e-10	0.8469
3.4551e-10	0.8367
4.9239e-10	0.8878
7.017e-10	0.8367
1e-09	0.8469
1.4251e-09	0.8571
2.0309e-09	0.8265
2.8943e-09	0.7347
4.1246e-09	0.7143
5.878e-09	0.6327
8.3768e-09	0.449
1.1938e-08	0.3776
1.7013e-08	0.1429
2.4245e-08	0.1633
3.4551e-08	0.0306
4.9239e-08	0.0612
7.017e-08	0.0714
1e-07	0.0816
1.4251e-07	0.0714
2.0309e-07	0.102
2.8943e-07	0.0918
4.1246e-07	0.0918
5.878e-07	0.0714
8.3768e-07	0.0612
1.1938e-06	0.0714
1.7013e-06	0.102
2.4245e-06	0.1224
3.4551e-06	0.102
4.9239e-06	0.051
7.017e-06	0.0612
1e-05	0.0408
1e-11	0.9184
1.4251e-11	0.8878
2.0309e-11	0.8571
2.8943e-11	0.9592
4.1246e-11	0.9592
5.878e-11	0.9388
8.3768e-11	0.898
1.1938e-10	0.8571
1.7013e-10	0.949
2.4245e-10	0.8571
3.4551e-10	0.8571
4.9239e-10	0.898
7.017e-10	0.898
1e-09	0.8469
1.4251e-09	0.7857
2.0309e-09	0.7755
2.8943e-09	0.7755
4.1246e-09	0.7551
5.878e-09	0.6429
8.3768e-09	0.4592
1.1938e-08	0.3367
1.7013e-08	0.1837
2.4245e-08	0.0918
3.4551e-08	0.0408
4.9239e-08	0.0408
7.017e-08	0.102
1e-07	0.1122
1.4251e-07	0.1122
2.0309e-07	0.1327
2.8943e-07	0.1429
4.1246e-07	0.0306
5.878e-07	0.0918
8.3768e-07	0.1735
1.1938e-06	0.102
1.7013e-06	0.0612
2.4245e-06	0.102
3.4551e-06	0.1122
4.9239e-06	0.0816
7.017e-06	0.051
1e-05	0.051
1e-11	0.9082
1.4251e-11	0.8163
2.0309e-11	0.8571
2.8943e-11	0.898
4.1246e-11	0.8878
5.878e-11	0.8571
8.3768e-11	0.9184
1.1938e-10	0.9184
1.7013e-10	0.8673
2.4245e-10	0.9082
3.4551e-10	0.8163
4.9239e-10	0.8673
7.017e-10	0.8571
1e-09	0.8571
1.4251e-09	0.8673
2.0309e-09	0.8776
2.8943e-09	0.7755
4.1246e-09	0.7347
5.878e-09	0.6531
8.3768e-09	0.5102
1.1938e-08	0.3878
1.7013e-08	0.2551
2.4245e-08	0.0918
3.4551e-08	0.1327
4.9239e-08	0.1633
7.017e-08	0.1224
1e-07	0.0612
1.4251e-07	0.0816
2.0309e-07	0.0714
2.8943e-07	0.0408
4.1246e-07	0.051
5.878e-07	0.0612
8.3768e-07	0.1122
1.1938e-06	0.0918
1.7013e-06	0.0714
2.4245e-06	0.0714
3.4551e-06	0.0918
4.9239e-06	0.0306
7.017e-06	0.0714
1e-05	0.0612
1e-11	0.8878
1.4251e-11	0.8673
2.0309e-11	0.9286
2.8943e-11	0.8061
4.1246e-11	0.9388
5.878e-11	0.898
8.3768e-11	0.8776
1.1938e-10	0.8571
1.7013e-10	0.9082
2.4245e-10	0.898
3.4551e-10	0.8776
4.9239e-10	0.9184
7.017e-10	0.8878
1e-09	0.8776
1.4251e-09	0.8061
2.0309e-09	0.8265
2.8943e-09	0.8163
4.1246e-09	0.8163
5.878e-09	0.6939
8.3768e-09	0.6633
1.1938e-08	0.2959
1.7013e-08	0.2551
2.4245e-08	0.1122
3.4551e-08	0.102
4.9239e-08	0.0714
7.017e-08	0.0408
1e-07	0.1327
1.4251e-07	0.0714
2.0309e-07	0.0918
2.8943e-07	0.0918
4.1246e-07	0.1122
5.878e-07	0.0918
8.3768e-07	0.1429
1.1938e-06	0.1327
1.7013e-06	0.0714
2.4245e-06	0.102
3.4551e-06	0.1327
4.9239e-06	0.0918
7.017e-06	0.0612
1e-05	0.0816
1e-11	0.8673
1.4251e-11	0.9286
2.0309e-11	0.8673
2.8943e-11	0.8571
4.1246e-11	0.9184
5.878e-11	0.7959
8.3768e-11	0.8673
1.1938e-10	0.8571
1.7013e-10	0.8571
2.4245e-10	0.8776
3.4551e-10	0.8265
4.9239e-10	0.9082
7.017e-10	0.8163
1e-09	0.8878
1.4251e-09	0.898
2.0309e-09	0.7959
2.8943e-09	0.7449
4.1246e-09	0.7755
5.878e-09	0.6429
8.3768e-09	0.4184
1.1938e-08	0.4184
1.7013e-08	0.2245
2.4245e-08	0.1531
3.4551e-08	0.1531
4.9239e-08	0.1429
7.017e-08	0.0918
1e-07	0.1122
1.4251e-07	0.1224
2.0309e-07	0.0408
2.8943e-07	0.0816
4.1246e-07	0.1224
5.878e-07	0.0816
8.3768e-07	0.0612
1.1938e-06	0.1327
1.7013e-06	0.0714
2.4245e-06	0.102
3.4551e-06	0.102
4.9239e-06	0.1122
7.017e-06	0.0612
1e-05	0.0816
1e-11	0.898
1.4251e-11	0.8469
2.0309e-11	0.8367
2.8943e-11	0.8776
4.1246e-11	0.9184
5.878e-11	0.8878
8.3768e-11	0.9082
1.1938e-10	0.8163
1.7013e-10	0.8571
2.4245e-10	0.898
3.4551e-10	0.9082
4.9239e-10	0.9592
7.017e-10	0.898
1e-09	0.8878
1.4251e-09	0.898
2.0309e-09	0.8673
2.8943e-09	0.9082
4.1246e-09	0.7653
5.878e-09	0.6939
8.3768e-09	0.5204
1.1938e-08	0.3163
1.7013e-08	0.2449
2.4245e-08	0.1531
3.4551e-08	0.1327
4.9239e-08	0.1224
7.017e-08	0.0918
1e-07	0.1122
1.4251e-07	0.1429
2.0309e-07	0.1224
2.8943e-07	0.1327
4.1246e-07	0.102
5.878e-07	0.102
8.3768e-07	0.0204
1.1938e-06	0.0918
1.7013e-06	0.0714
2.4245e-06	0.0918
3.4551e-06	0.1327
4.9239e-06	0.0918
7.017e-06	0.0816
1e-05	0.1122
1e-11	0.7959
1.4251e-11	0.8776
2.0309e-11	0.8776
2.8943e-11	0.8163
4.1246e-11	0.9184
5.878e-11	0.8878
8.3768e-11	0.8776
1.1938e-10	0.9592
1.7013e-10	0.9388
2.4245e-10	0.8367
3.4551e-10	0.8673
4.9239e-10	0.9286
7.017e-10	0.8776
1e-09	0.8673
1.4251e-09	0.8367
2.0309e-09	0.8571
2.8943e-09	0.7551
4.1246e-09	0.7755
5.878e-09	0.6633
8.3768e-09	0.6224
1.1938e-08	0.2857
1.7013e-08	0.1531
2.4245e-08	0.1939
3.4551e-08	0.1429
4.9239e-08	0.1327
7.017e-08	0.102
1e-07	0.0918
1.4251e-07	0.2041
2.0309e-07	0.1224
2.8943e-07	0.1633
4.1246e-07	0.102
5.878e-07	0.1633
8.3768e-07	0.0816
1.1938e-06	0.0714
1.7013e-06	0.0612
2.4245e-06	0.0816
3.4551e-06	0.1122
4.9239e-06	0.0408
7.017e-06	0.0918
1e-05	0.0816
1e-11	0.8469
1.4251e-11	0.9796
2.0309e-11	0.8673
2.8943e-11	0.8673
4.1246e-11	0.8878
5.878e-11	0.8571
8.3768e-11	0.9082
1.1938e-10	0.9184
1.7013e-10	0.898
2.4245e-10	0.8469
3.4551e-10	0.7857
4.9239e-10	0.8878
7.017e-10	0.949
1e-09	0.8776
1.4251e-09	0.9694
2.0309e-09	0.8367
2.8943e-09	0.8673
4.1246e-09	0.6939
5.878e-09	0.5306
8.3768e-09	0.4592
1.1938e-08	0.3367
1.7013e-08	0.2245
2.4245e-08	0.1837
3.4551e-08	0.1122
4.9239e-08	0.1122
7.017e-08	0.102
1e-07	0.1429
1.4251e-07	0.1531
2.0309e-07	0.0408
2.8943e-07	0.0816
4.1246e-07	0.0714
5.878e-07	0.1327
8.3768e-07	0.0612
1.1938e-06	0.102
1.7013e-06	0.0816
2.4245e-06	0.0816
3.4551e-06	0.051
4.9239e-06	0.0612
7.017e-06	0.102
1e-05	0.051

## Sheet: Supple2_higher_densities_kDeff
p=14.7 per 7 x 7 nm2		p=29.4 per 7 x 7 nm2		p=44.1 per 7 x 7 nm2		p=58.8 per 7 x 7 nm2		Control
kD_catenator	kD_eff	kD_catenator	kD_eff	kD_catenator	kD_eff	kD_catenator	kD_eff	kD_catenator	kD_eff
1e-08	1.4209e-11	1e-08	7.4334e-12	1e-08	4.9829e-12	1e-08	3.2472e-12	1e-08	1e-08
1.4251e-08	1.3293e-11	1.4251e-08	6.7797e-12	1.4251e-08	4.5486e-12	1.4251e-08	2.9457e-12	0.00025642	1e-08
2.0309e-08	1.1889e-11	2.0309e-08	6.0236e-12	2.0309e-08	4.1163e-12	2.0309e-08	2.6584e-12	0.00051283	1e-08
2.8943e-08	1.0515e-11	2.8943e-08	5.2551e-12	2.8943e-08	3.4881e-12	2.8943e-08	2.3554e-12	0.00076924	1e-08
4.1246e-08	9.0045e-12	4.1246e-08	4.5026e-12	4.1246e-08	3.0245e-12	4.1246e-08	1.911e-12	0.001	1e-08
5.878e-08	7.5707e-12	5.878e-08	3.595e-12	5.878e-08	2.4763e-12	5.878e-08	1.3801e-12	0.0013	1e-08
8.3768e-08	6.0537e-12	8.3768e-08	2.8573e-12	8.3768e-08	1.9058e-12	8.3768e-08	9.7935e-13	0.0015	1e-08
1.1938e-07	4.7285e-12	1.1938e-07	2.1684e-12	1.1938e-07	1.3147e-12	1.1938e-07	6.1011e-13	0.0018	1e-08
1.7013e-07	3.5075e-12	1.7013e-07	1.557e-12	1.7013e-07	8.9925e-13	1.7013e-07	4.0666e-13	0.0021	1e-08
2.4245e-07	2.8327e-12	2.4245e-07	1.1317e-12	2.4245e-07	7.1829e-13	2.4245e-07	3.4497e-13	0.0023	1e-08
3.4551e-07	2.3493e-12	3.4551e-07	1.0014e-12	3.4551e-07	6.4929e-13	3.4551e-07	3.8772e-13	0.0026	1e-08
4.9239e-07	2.4e-12	4.9239e-07	1.0956e-12	4.9239e-07	6.5527e-13	4.9239e-07	4.2499e-13	0.0028	1e-08
7.017e-07	2.5938e-12	7.017e-07	1.2271e-12	7.017e-07	7.9382e-13	7.017e-07	5.3679e-13	0.0031	1e-08
1e-06	3.3109e-12	1e-06	1.5178e-12	1e-06	1.0417e-12	1e-06	6.9934e-13	0.0033	1e-08
1.4251e-06	4.2744e-12	1.4251e-06	2.063e-12	1.4251e-06	1.3277e-12	1.4251e-06	8.9252e-13	0.0036	1e-08
2.0309e-06	5.7408e-12	2.0309e-06	2.7541e-12	2.0309e-06	1.7887e-12	2.0309e-06	1.3391e-12	0.0038	1e-08
2.8943e-06	7.7765e-12	2.8943e-06	3.726e-12	2.8943e-06	2.395e-12	2.8943e-06	1.8154e-12	0.0041	1e-08
4.1246e-06	1.116e-11	4.1246e-06	5.1121e-12	4.1246e-06	3.3844e-12	4.1246e-06	2.5725e-12	0.0044	1e-08
5.878e-06	1.5787e-11	5.878e-06	7.2705e-12	5.878e-06	4.7994e-12	5.878e-06	3.552e-12	0.0046	1e-08
8.3768e-06	2.2378e-11	8.3768e-06	1.0237e-11	8.3768e-06	6.8533e-12	8.3768e-06	5.0023e-12	0.0049	1e-08
1.1938e-05	3.1949e-11	1.1938e-05	1.4665e-11	1.1938e-05	9.6622e-12	1.1938e-05	7.247e-12	0.0051	1e-08
1.7013e-05	4.5998e-11	1.7013e-05	2.0985e-11	1.7013e-05	1.3985e-11	1.7013e-05	1.025e-11	0.0054	1e-08
2.4245e-05	6.5853e-11	2.4245e-05	3.0267e-11	2.4245e-05	1.9621e-11	2.4245e-05	1.4392e-11	0.0056	1e-08
3.4551e-05	9.6498e-11	3.4551e-05	4.3326e-11	3.4551e-05	2.8139e-11	3.4551e-05	2.0937e-11	0.0059	1e-08
4.9239e-05	1.4149e-10	4.9239e-05	6.2219e-11	4.9239e-05	4.0199e-11	4.9239e-05	2.9731e-11	0.0062	1e-08
7.017e-05	2.1124e-10	7.017e-05	8.9793e-11	7.017e-05	5.7487e-11	7.017e-05	4.2197e-11	0.0064	1e-08
0.0001	3.229e-10	0.0001	1.3127e-10	0.0001	8.3262e-11	0.0001	6.1142e-11	0.0067	1e-08
0.00014251	5.1744e-10	0.00014251	1.9486e-10	0.00014251	1.2099e-10	0.00014251	8.8349e-11	0.0069	1e-08
0.00020309	8.7655e-10	0.00020309	2.946e-10	0.00020309	1.7806e-10	0.00020309	1.2757e-10	0.0072	1e-08
0.00028943	1.5933e-09	0.00028943	4.5974e-10	0.00028943	2.6857e-10	0.00028943	1.8904e-10	0.0074	1e-08
0.00041246	2.8571e-09	0.00041246	7.5487e-10	0.00041246	4.1289e-10	0.00041246	2.8502e-10	0.0077	1e-08
0.0005878	4.4645e-09	0.0005878	1.3204e-09	0.0005878	6.6546e-10	0.0005878	4.4113e-10	0.0079	1e-08
0.00083768	6.0127e-09	0.00083768	2.3951e-09	0.00083768	1.1434e-09	0.00083768	7.1395e-10	0.0082	1e-08
0.0012	7.1891e-09	0.0012	3.9692e-09	0.0012	2.0477e-09	0.0012	1.2277e-09	0.0085	1e-08
0.0017	8.0314e-09	0.0017	5.6103e-09	0.0017	3.5265e-09	0.0017	2.2136e-09	0.0087	1e-08
0.0024	8.6844e-09	0.0024	6.8881e-09	0.0024	5.1872e-09	0.0024	3.7325e-09	0.009	1e-08
