# Supplementary material for: Noncovalent antibody catenation on a target surface greatly increases the antigen-binding avidity
Source: eLife. 2023 May 30;12:e81646. doi: 10.7554/eLife.81646 (PMC10229114; doi:10.7554/eLife.81646)
Supplement: Figure 4—figure supplement 1—source data 2. [file elife-81646-fig4-figsupp1-data2.xlsx]

## Sheet: Sheet1
ρ	Maximum enhancement	(KD)Catenator,50 (M)
14.7	4256.7	5.25*10-5
29.4	9986.3	8.50*10-5
44.1	15401.4	9.00*10-5
58.8	28988.2	9.50*10-5
ρ: Number of binding sites per 7x7 nm2
