# Supplementary material for: Noncovalent antibody catenation on a target surface greatly increases the antigen-binding avidity
Source: eLife. 2023 May 30;12:e81646. doi: 10.7554/eLife.81646 (PMC10229114; doi:10.7554/eLife.81646)
Supplement: Figure 4—figure supplement 2—source data 1. [file elife-81646-fig4-figsupp2-data1.xlsx]

## Sheet: Supple3_intrinsic_binding_BO
[catAb]/kD = 1.0		[catAb]/kD = 0.3		[catAb]/kD = 0.1		[catAb]/kD = 0.03		[catAb]/kD = 0.01
kD_catenator	Binding Occupancy	kD_catenator	Binding Occupancy	kD_catenator	Binding Occupancy	kD_catenator	Binding Occupancy	kD_catenator	Binding Occupancy
1e-11	0.9863	1e-11	0.977	1e-11	0.9026	1e-11	0.6602	1e-11	0.5026
1.4251e-11	0.9868	1.4251e-11	0.9768	1.4251e-11	0.9034	1.4251e-11	0.6595	1.4251e-11	0.5018
2.0309e-11	0.9875	2.0309e-11	0.9768	2.0309e-11	0.9026	2.0309e-11	0.6604	2.0309e-11	0.5022
2.8943e-11	0.9883	2.8943e-11	0.9779	2.8943e-11	0.9034	2.8943e-11	0.6603	2.8943e-11	0.5033
4.1246e-11	0.9893	4.1246e-11	0.9788	4.1246e-11	0.9033	4.1246e-11	0.6618	4.1246e-11	0.5028
5.878e-11	0.9907	5.878e-11	0.9803	5.878e-11	0.9047	5.878e-11	0.6607	5.878e-11	0.5014
8.3768e-11	0.9926	8.3768e-11	0.9821	8.3768e-11	0.9045	8.3768e-11	0.6612	8.3768e-11	0.4983
1.1938e-10	0.9947	1.1938e-10	0.9841	1.1938e-10	0.9074	1.1938e-10	0.6603	1.1938e-10	0.4954
1.7013e-10	0.9968	1.7013e-10	0.9872	1.7013e-10	0.9092	1.7013e-10	0.6602	1.7013e-10	0.4926
2.4245e-10	0.9981	2.4245e-10	0.9899	2.4245e-10	0.9118	2.4245e-10	0.6612	2.4245e-10	0.4877
3.4551e-10	0.9984	3.4551e-10	0.9918	3.4551e-10	0.9167	3.4551e-10	0.6606	3.4551e-10	0.4787
4.9239e-10	0.9979	4.9239e-10	0.992	4.9239e-10	0.92	4.9239e-10	0.6593	4.9239e-10	0.4702
7.017e-10	0.9966	7.017e-10	0.9892	7.017e-10	0.9216	7.017e-10	0.6567	7.017e-10	0.4477
1e-09	0.9948	1e-09	0.9835	1e-09	0.9155	1e-09	0.6403	1e-09	0.4123
1.4251e-09	0.9919	1.4251e-09	0.9735	1.4251e-09	0.8961	1.4251e-09	0.5952	1.4251e-09	0.3431
2.0309e-09	0.9868	2.0309e-09	0.959	2.0309e-09	0.8548	2.0309e-09	0.507	2.0309e-09	0.2358
2.8943e-09	0.9796	2.8943e-09	0.9353	2.8943e-09	0.7829	2.8943e-09	0.3615	2.8943e-09	0.0999
4.1246e-09	0.968	4.1246e-09	0.8982	4.1246e-09	0.6698	4.1246e-09	0.1737	4.1246e-09	0.0241
5.878e-09	0.9502	5.878e-09	0.8424	5.878e-09	0.5016	5.878e-09	0.0683	5.878e-09	0.0122
8.3768e-09	0.9239	8.3768e-09	0.762	8.3768e-09	0.31	8.3768e-09	0.0452	8.3768e-09	0.0107
1.1938e-08	0.8845	1.1938e-08	0.646	1.1938e-08	0.1887	1.1938e-08	0.0378	1.1938e-08	0.0105
1.7013e-08	0.8316	1.7013e-08	0.5121	1.7013e-08	0.1359	1.7013e-08	0.0348	1.7013e-08	0.0102
2.4245e-08	0.7621	2.4245e-08	0.3972	2.4245e-08	0.116	2.4245e-08	0.0334	2.4245e-08	0.01
3.4551e-08	0.6892	3.4551e-08	0.3281	3.4551e-08	0.1045	3.4551e-08	0.032	3.4551e-08	0.0102
4.9239e-08	0.6235	4.9239e-08	0.2906	4.9239e-08	0.0981	4.9239e-08	0.0317	4.9239e-08	0.0099
7.017e-08	0.5794	7.017e-08	0.2689	7.017e-08	0.0955	7.017e-08	0.0312	7.017e-08	0.0099
1e-07	0.548	1e-07	0.2577	1e-07	0.093	1e-07	0.0309	1e-07	0.0098
1.4251e-07	0.5292	1.4251e-07	0.2502	1.4251e-07	0.0928	1.4251e-07	0.0306	1.4251e-07	0.0099
2.0309e-07	0.5183	2.0309e-07	0.247	2.0309e-07	0.0915	2.0309e-07	0.0309	2.0309e-07	0.01
2.8943e-07	0.5119	2.8943e-07	0.2443	2.8943e-07	0.0914	2.8943e-07	0.0307	2.8943e-07	0.0101
4.1246e-07	0.5069	4.1246e-07	0.2422	4.1246e-07	0.0905	4.1246e-07	0.0302	4.1246e-07	0.0099
5.878e-07	0.5033	5.878e-07	0.2425	5.878e-07	0.0911	5.878e-07	0.031	5.878e-07	0.01
8.3768e-07	0.5029	8.3768e-07	0.2417	8.3768e-07	0.0909	8.3768e-07	0.0305	8.3768e-07	0.0101
1.1938e-06	0.5031	1.1938e-06	0.2406	1.1938e-06	0.0905	1.1938e-06	0.0307	1.1938e-06	0.01
1.7013e-06	0.5008	1.7013e-06	0.2405	1.7013e-06	0.0909	1.7013e-06	0.031	1.7013e-06	0.0099
2.4245e-06	0.5012	2.4245e-06	0.241	2.4245e-06	0.0909	2.4245e-06	0.0312	2.4245e-06	0.01
3.4551e-06	0.4993	3.4551e-06	0.2414	3.4551e-06	0.0905	3.4551e-06	0.0304	3.4551e-06	0.0098
4.9239e-06	0.4989	4.9239e-06	0.2415	4.9239e-06	0.0915	4.9239e-06	0.0307	4.9239e-06	0.01
7.017e-06	0.5004	7.017e-06	0.2416	7.017e-06	0.0909	7.017e-06	0.0303	7.017e-06	0.01
1e-05	0.502	1e-05	0.2394	1e-05	0.0914	1e-05	0.031	1e-05	0.0097
1e-11	0.898
1.4251e-11	0.898
2.0309e-11	0.9184
2.8943e-11	0.898
4.1246e-11	0.8571
5.878e-11	0.8469
8.3768e-11	0.8878
1.1938e-10	0.8673
1.7013e-10	0.8469
2.4245e-10	0.9286
3.4551e-10	0.8469
4.9239e-10	0.898
7.017e-10	0.8163
1e-09	0.9286
1.4251e-09	0.8878
2.0309e-09	0.7857
2.8943e-09	0.7449
4.1246e-09	0.6939
5.878e-09	0.602
8.3768e-09	0.4082
1.1938e-08	0.4184
1.7013e-08	0.1735
2.4245e-08	0.1633
3.4551e-08	0.2143
4.9239e-08	0.1122
7.017e-08	0.1122
1e-07	0.0816
1.4251e-07	0.0918
2.0309e-07	0.0918
2.8943e-07	0.0816
4.1246e-07	0.0918
5.878e-07	0.102
8.3768e-07	0.1122
1.1938e-06	0.0816
1.7013e-06	0.0918
2.4245e-06	0.0816
3.4551e-06	0.0102
4.9239e-06	0.1122
7.017e-06	0.102
1e-05	0.051
1e-11	0.8673
1.4251e-11	0.898
2.0309e-11	0.9082
2.8943e-11	0.898
4.1246e-11	0.7551
5.878e-11	0.8469
8.3768e-11	0.8469
1.1938e-10	0.898
1.7013e-10	0.8673
2.4245e-10	0.949
3.4551e-10	0.9184
4.9239e-10	0.8776
7.017e-10	0.9082
1e-09	0.8878
1.4251e-09	0.8469
2.0309e-09	0.8265
2.8943e-09	0.8367
4.1246e-09	0.6735
5.878e-09	0.6429
8.3768e-09	0.6122
1.1938e-08	0.2347
1.7013e-08	0.2449
2.4245e-08	0.1735
3.4551e-08	0.051
4.9239e-08	0.102
7.017e-08	0.1327
1e-07	0.1122
1.4251e-07	0.1224
2.0309e-07	0.0714
2.8943e-07	0.0714
4.1246e-07	0.102
5.878e-07	0.1224
8.3768e-07	0.0816
1.1938e-06	0.102
1.7013e-06	0.0612
2.4245e-06	0.102
3.4551e-06	0.0612
4.9239e-06	0.1224
7.017e-06	0.1122
1e-05	0.1429
1e-11	0.9082
1.4251e-11	0.8776
2.0309e-11	0.8571
2.8943e-11	0.8776
4.1246e-11	0.8163
5.878e-11	0.8878
8.3768e-11	0.8878
1.1938e-10	0.898
1.7013e-10	0.7857
2.4245e-10	0.8878
3.4551e-10	0.8469
4.9239e-10	0.898
7.017e-10	0.9082
1e-09	0.898
1.4251e-09	0.7653
2.0309e-09	0.8469
2.8943e-09	0.898
4.1246e-09	0.7143
5.878e-09	0.5408
8.3768e-09	0.4286
1.1938e-08	0.3469
1.7013e-08	0.2653
2.4245e-08	0.2551
3.4551e-08	0.0918
4.9239e-08	0.0918
7.017e-08	0.1837
1e-07	0.051
1.4251e-07	0.102
2.0309e-07	0.0918
2.8943e-07	0.1122
4.1246e-07	0.1224
5.878e-07	0.1429
8.3768e-07	0.0918
1.1938e-06	0.0714
1.7013e-06	0.0408
2.4245e-06	0.0612
3.4551e-06	0.1224
4.9239e-06	0.0918
7.017e-06	0.051
1e-05	0.1327
1e-11	0.8469
1.4251e-11	0.8776
2.0309e-11	0.8776
2.8943e-11	0.9286
4.1246e-11	0.8673
5.878e-11	0.8265
8.3768e-11	0.8367
1.1938e-10	0.8878
1.7013e-10	0.8776
2.4245e-10	0.8776
3.4551e-10	0.8571
4.9239e-10	0.9082
7.017e-10	0.8673
1e-09	0.8469
1.4251e-09	0.8571
2.0309e-09	0.8367
2.8943e-09	0.8061
4.1246e-09	0.7347
5.878e-09	0.5612
8.3768e-09	0.4592
1.1938e-08	0.2653
1.7013e-08	0.3163
2.4245e-08	0.1429
3.4551e-08	0.1735
4.9239e-08	0.102
7.017e-08	0.0816
1e-07	0.1735
1.4251e-07	0.0918
2.0309e-07	0.1122
2.8943e-07	0.1122
4.1246e-07	0.102
5.878e-07	0.0612
8.3768e-07	0.1531
1.1938e-06	0.0714
1.7013e-06	0.0408
2.4245e-06	0.1122
3.4551e-06	0.1122
4.9239e-06	0.0918
7.017e-06	0.1122
1e-05	0.1122
1e-11	0.8265
1.4251e-11	0.8265
2.0309e-11	0.8878
2.8943e-11	0.8571
4.1246e-11	0.8163
5.878e-11	0.8776
8.3768e-11	0.8673
1.1938e-10	0.9082
1.7013e-10	0.898
2.4245e-10	0.8878
3.4551e-10	0.8367
4.9239e-10	0.9082
7.017e-10	0.8163
1e-09	0.8878
1.4251e-09	0.8163
2.0309e-09	0.898
2.8943e-09	0.7653
4.1246e-09	0.7653
5.878e-09	0.6531
8.3768e-09	0.3673
1.1938e-08	0.2857
1.7013e-08	0.2041
2.4245e-08	0.1224
3.4551e-08	0.0918
4.9239e-08	0.1224
7.017e-08	0.102
1e-07	0.1633
1.4251e-07	0.0714
2.0309e-07	0.051
2.8943e-07	0.0714
4.1246e-07	0.102
5.878e-07	0.1224
8.3768e-07	0.1224
1.1938e-06	0.0918
1.7013e-06	0.0612
2.4245e-06	0.102
3.4551e-06	0.1224
4.9239e-06	0.102
7.017e-06	0.0918
1e-05	0.0714
1e-11	0.8878
1.4251e-11	0.8673
2.0309e-11	0.8265
2.8943e-11	0.8878
4.1246e-11	0.9286
5.878e-11	0.898
8.3768e-11	0.9388
1.1938e-10	0.8265
1.7013e-10	0.8878
2.4245e-10	0.898
3.4551e-10	0.8061
4.9239e-10	0.9388
7.017e-10	0.898
1e-09	0.8571
1.4251e-09	0.8367
2.0309e-09	0.8571
2.8943e-09	0.7653
4.1246e-09	0.6939
5.878e-09	0.551
8.3768e-09	0.449
1.1938e-08	0.3061
1.7013e-08	0.2755
2.4245e-08	0.3163
3.4551e-08	0.0714
4.9239e-08	0.1633
7.017e-08	0.1122
1e-07	0.0918
1.4251e-07	0.102
2.0309e-07	0.102
2.8943e-07	0.1327
4.1246e-07	0.0714
5.878e-07	0.0816
8.3768e-07	0.051
1.1938e-06	0.102
1.7013e-06	0.1224
2.4245e-06	0.0816
3.4551e-06	0.0408
4.9239e-06	0.1939
7.017e-06	0.0816
1e-05	0.051
1e-11	0.8776
1.4251e-11	0.8061
2.0309e-11	0.8061
2.8943e-11	0.8878
4.1246e-11	0.8673
5.878e-11	0.898
8.3768e-11	0.8367
1.1938e-10	0.8469
1.7013e-10	0.9286
2.4245e-10	0.8469
3.4551e-10	0.8469
4.9239e-10	0.9286
7.017e-10	0.8878
1e-09	0.9286
1.4251e-09	0.8469
2.0309e-09	0.8469
2.8943e-09	0.8163
4.1246e-09	0.6837
5.878e-09	0.6837
8.3768e-09	0.3469
1.1938e-08	0.3061
1.7013e-08	0.2245
2.4245e-08	0.2143
3.4551e-08	0.1429
4.9239e-08	0.1429
7.017e-08	0.102
1e-07	0.1837
1.4251e-07	0.0714
2.0309e-07	0.102
2.8943e-07	0.1531
4.1246e-07	0.102
5.878e-07	0.1224
8.3768e-07	0.0816
1.1938e-06	0.0612
1.7013e-06	0.0714
2.4245e-06	0.1122
3.4551e-06	0.0612
4.9239e-06	0.0816
7.017e-06	0.102
1e-05	0.0918
1e-11	0.8163
1.4251e-11	0.898
2.0309e-11	0.8265
2.8943e-11	0.8673
4.1246e-11	0.8571
5.878e-11	0.898
8.3768e-11	0.9286
1.1938e-10	0.8367
1.7013e-10	0.9184
2.4245e-10	0.898
3.4551e-10	0.8571
4.9239e-10	0.898
7.017e-10	0.9082
1e-09	0.8061
1.4251e-09	0.8571
2.0309e-09	0.8673
2.8943e-09	0.7857
4.1246e-09	0.7551
5.878e-09	0.5306
8.3768e-09	0.5102
1.1938e-08	0.2653
1.7013e-08	0.2449
2.4245e-08	0.2449
3.4551e-08	0.1429
4.9239e-08	0.1224
7.017e-08	0.0408
1e-07	0.0714
1.4251e-07	0.1327
2.0309e-07	0.0816
2.8943e-07	0.0714
4.1246e-07	0.102
5.878e-07	0.0408
8.3768e-07	0.051
1.1938e-06	0.0816
1.7013e-06	0.0918
2.4245e-06	0.102
3.4551e-06	0.0408
4.9239e-06	0.1122
7.017e-06	0.102
1e-05	0.1531
1e-11	0.9286
1.4251e-11	0.8265
2.0309e-11	0.8673
2.8943e-11	0.8776
4.1246e-11	0.9184
5.878e-11	0.7959
8.3768e-11	0.949
1.1938e-10	0.9286
1.7013e-10	0.7959
2.4245e-10	0.8163
3.4551e-10	0.9184
4.9239e-10	0.8878
7.017e-10	0.898
1e-09	0.9082
1.4251e-09	0.9082
2.0309e-09	0.8673
2.8943e-09	0.7653
4.1246e-09	0.7755
5.878e-09	0.6939
8.3768e-09	0.5714
1.1938e-08	0.3265
1.7013e-08	0.2041
2.4245e-08	0.0918
3.4551e-08	0.1633
4.9239e-08	0.1531
7.017e-08	0.1837
1e-07	0.0306
1.4251e-07	0.0714
2.0309e-07	0.0714
2.8943e-07	0.102
4.1246e-07	0.1122
5.878e-07	0.0918
8.3768e-07	0.1224
1.1938e-06	0.1122
1.7013e-06	0.1122
2.4245e-06	0.051
3.4551e-06	0.0918
4.9239e-06	0.0714
7.017e-06	0.1224
1e-05	0.1224
1e-11	0.8571
1.4251e-11	0.9082
2.0309e-11	0.9082
2.8943e-11	0.8061
4.1246e-11	0.9082
5.878e-11	0.8776
8.3768e-11	0.8367
1.1938e-10	0.8878
1.7013e-10	0.898
2.4245e-10	0.8776
3.4551e-10	0.8367
4.9239e-10	0.9082
7.017e-10	0.8367
1e-09	0.9082
1.4251e-09	0.9082
2.0309e-09	0.8571
2.8943e-09	0.7449
4.1246e-09	0.7755
5.878e-09	0.6633
8.3768e-09	0.5204
1.1938e-08	0.3673
1.7013e-08	0.2551
2.4245e-08	0.0816
3.4551e-08	0.0918
4.9239e-08	0.1327
7.017e-08	0.1224
1e-07	0.0918
1.4251e-07	0.102
2.0309e-07	0.1122
2.8943e-07	0.0918
4.1246e-07	0.0918
5.878e-07	0.0816
8.3768e-07	0.0612
1.1938e-06	0.051
1.7013e-06	0.1224
2.4245e-06	0.102
3.4551e-06	0.1122
4.9239e-06	0.1122
7.017e-06	0.1122
1e-05	0.0918
1e-11	0.7959
1.4251e-11	0.8673
2.0309e-11	0.8776
2.8943e-11	0.8571
4.1246e-11	0.8776
5.878e-11	0.8878
8.3768e-11	0.8878
1.1938e-10	0.898
1.7013e-10	0.9082
2.4245e-10	0.8776
3.4551e-10	0.8673
4.9239e-10	0.9082
7.017e-10	0.8776
1e-09	0.9286
1.4251e-09	0.8571
2.0309e-09	0.8776
2.8943e-09	0.7959
4.1246e-09	0.6939
5.878e-09	0.6122
8.3768e-09	0.5714
1.1938e-08	0.398
1.7013e-08	0.2347
2.4245e-08	0.1429
3.4551e-08	0.1735
4.9239e-08	0.1327
7.017e-08	0.0816
1e-07	0.1327
1.4251e-07	0.1122
2.0309e-07	0.0714
2.8943e-07	0.0306
4.1246e-07	0.0918
5.878e-07	0.0714
8.3768e-07	0.0612
1.1938e-06	0.1633
1.7013e-06	0.0714
2.4245e-06	0.1122
3.4551e-06	0.0816
4.9239e-06	0.1327
7.017e-06	0.0918
1e-05	0.0816
1e-11	0.8571
1.4251e-11	0.8571
2.0309e-11	0.8061
2.8943e-11	0.9694
4.1246e-11	0.8878
5.878e-11	0.9286
8.3768e-11	0.8878
1.1938e-10	0.8878
1.7013e-10	0.8878
2.4245e-10	0.8469
3.4551e-10	0.8061
4.9239e-10	0.8673
7.017e-10	0.898
1e-09	0.9184
1.4251e-09	0.8776
2.0309e-09	0.8469
2.8943e-09	0.7551
4.1246e-09	0.6939
5.878e-09	0.6939
8.3768e-09	0.5306
1.1938e-08	0.3061
1.7013e-08	0.2449
2.4245e-08	0.1224
3.4551e-08	0.0816
4.9239e-08	0.0918
7.017e-08	0.102
1e-07	0.0714
1.4251e-07	0.0816
2.0309e-07	0.102
2.8943e-07	0.051
4.1246e-07	0.1122
5.878e-07	0.0714
8.3768e-07	0.102
1.1938e-06	0.102
1.7013e-06	0.0918
2.4245e-06	0.0816
3.4551e-06	0.0918
4.9239e-06	0.051
7.017e-06	0.102
1e-05	0.0306
1e-11	0.8571
1.4251e-11	0.7755
2.0309e-11	0.949
2.8943e-11	0.8776
4.1246e-11	0.898
5.878e-11	0.8571
8.3768e-11	0.8878
1.1938e-10	0.8571
1.7013e-10	0.8673
2.4245e-10	0.9082
3.4551e-10	0.8571
4.9239e-10	0.8469
7.017e-10	0.9082
1e-09	0.8878
1.4251e-09	0.8673
2.0309e-09	0.7755
2.8943e-09	0.7857
4.1246e-09	0.6224
5.878e-09	0.6327
8.3768e-09	0.4796
1.1938e-08	0.3571
1.7013e-08	0.1327
2.4245e-08	0.1429
3.4551e-08	0.0816
4.9239e-08	0.1224
7.017e-08	0.0714
1e-07	0.102
1.4251e-07	0.0714
2.0309e-07	0.0714
2.8943e-07	0.0918
4.1246e-07	0.0612
5.878e-07	0.1224
8.3768e-07	0.0918
1.1938e-06	0.0816
1.7013e-06	0.1327
2.4245e-06	0.0714
3.4551e-06	0.0816
4.9239e-06	0.0612
7.017e-06	0.1429
1e-05	0.051
1e-11	0.9898
1.4251e-11	0.8265
2.0309e-11	0.8673
2.8943e-11	0.9184
4.1246e-11	0.9082
5.878e-11	0.8878
8.3768e-11	0.8571
1.1938e-10	0.8265
1.7013e-10	0.8571
2.4245e-10	0.9286
3.4551e-10	0.8878
4.9239e-10	0.9184
7.017e-10	0.9082
1e-09	0.8469
1.4251e-09	0.8878
2.0309e-09	0.8163
2.8943e-09	0.7653
4.1246e-09	0.7245
5.878e-09	0.6939
8.3768e-09	0.5408
1.1938e-08	0.2449
1.7013e-08	0.2653
2.4245e-08	0.1633
3.4551e-08	0.0816
4.9239e-08	0.102
7.017e-08	0.1531
1e-07	0.1531
1.4251e-07	0.0714
2.0309e-07	0.102
2.8943e-07	0.0918
4.1246e-07	0.1122
5.878e-07	0.1122
8.3768e-07	0.1327
1.1938e-06	0.102
1.7013e-06	0.102
2.4245e-06	0.102
3.4551e-06	0.0714
4.9239e-06	0.0816
7.017e-06	0.0612
1e-05	0.0714
1e-11	0.9388
1.4251e-11	0.898
2.0309e-11	0.8367
2.8943e-11	0.8673
4.1246e-11	0.8673
5.878e-11	0.9286
8.3768e-11	0.8265
1.1938e-10	0.898
1.7013e-10	0.8776
2.4245e-10	0.8571
3.4551e-10	0.8878
4.9239e-10	0.9286
7.017e-10	0.8776
1e-09	0.8265
1.4251e-09	0.8061
2.0309e-09	0.9082
2.8943e-09	0.7959
4.1246e-09	0.7041
5.878e-09	0.6837
8.3768e-09	0.5612
1.1938e-08	0.2347
1.7013e-08	0.1837
2.4245e-08	0.1531
3.4551e-08	0.2245
4.9239e-08	0.1327
7.017e-08	0.1429
1e-07	0.1224
1.4251e-07	0.051
2.0309e-07	0.1122
2.8943e-07	0.0816
4.1246e-07	0.102
5.878e-07	0.1327
8.3768e-07	0.1327
1.1938e-06	0.0612
1.7013e-06	0.1327
2.4245e-06	0.0918
3.4551e-06	0.0714
4.9239e-06	0.0918
7.017e-06	0.0918
1e-05	0.1327
1e-11	0.8673
1.4251e-11	0.9082
2.0309e-11	0.8367
2.8943e-11	0.898
4.1246e-11	0.9082
5.878e-11	0.9694
8.3768e-11	0.9082
1.1938e-10	0.898
1.7013e-10	0.8776
2.4245e-10	0.8469
3.4551e-10	0.898
4.9239e-10	0.8367
7.017e-10	0.898
1e-09	0.8571
1.4251e-09	0.8163
2.0309e-09	0.8878
2.8943e-09	0.8469
4.1246e-09	0.7755
5.878e-09	0.602
8.3768e-09	0.5
1.1938e-08	0.3571
1.7013e-08	0.1531
2.4245e-08	0.102
3.4551e-08	0.1327
4.9239e-08	0.0816
7.017e-08	0.0714
1e-07	0.1224
1.4251e-07	0.102
2.0309e-07	0.0918
2.8943e-07	0.1224
4.1246e-07	0.0612
5.878e-07	0.1122
8.3768e-07	0.0612
1.1938e-06	0.0816
1.7013e-06	0.0612
2.4245e-06	0.1224
3.4551e-06	0.102
4.9239e-06	0.102
7.017e-06	0.1122
1e-05	0.0408
1e-11	0.8163
1.4251e-11	0.8776
2.0309e-11	0.9184
2.8943e-11	0.8367
4.1246e-11	0.9082
5.878e-11	0.9184
8.3768e-11	0.8367
1.1938e-10	0.9184
1.7013e-10	0.8265
2.4245e-10	0.8469
3.4551e-10	0.8367
4.9239e-10	0.8878
7.017e-10	0.8367
1e-09	0.8469
1.4251e-09	0.8571
2.0309e-09	0.8265
2.8943e-09	0.7347
4.1246e-09	0.7143
5.878e-09	0.6327
8.3768e-09	0.449
1.1938e-08	0.3776
1.7013e-08	0.1429
2.4245e-08	0.1633
3.4551e-08	0.0306
4.9239e-08	0.0612
7.017e-08	0.0714
1e-07	0.0816
1.4251e-07	0.0714
2.0309e-07	0.102
2.8943e-07	0.0918
4.1246e-07	0.0918
5.878e-07	0.0714
8.3768e-07	0.0612
1.1938e-06	0.0714
1.7013e-06	0.102
2.4245e-06	0.1224
3.4551e-06	0.102
4.9239e-06	0.051
7.017e-06	0.0612
1e-05	0.0408
1e-11	0.9184
1.4251e-11	0.8878
2.0309e-11	0.8571
2.8943e-11	0.9592
4.1246e-11	0.9592
5.878e-11	0.9388
8.3768e-11	0.898
1.1938e-10	0.8571
1.7013e-10	0.949
2.4245e-10	0.8571
3.4551e-10	0.8571
4.9239e-10	0.898
7.017e-10	0.898
1e-09	0.8469
1.4251e-09	0.7857
2.0309e-09	0.7755
2.8943e-09	0.7755
4.1246e-09	0.7551
5.878e-09	0.6429
8.3768e-09	0.4592
1.1938e-08	0.3367
1.7013e-08	0.1837
2.4245e-08	0.0918
3.4551e-08	0.0408
4.9239e-08	0.0408
7.017e-08	0.102
1e-07	0.1122
1.4251e-07	0.1122
2.0309e-07	0.1327
2.8943e-07	0.1429
4.1246e-07	0.0306
5.878e-07	0.0918
8.3768e-07	0.1735
1.1938e-06	0.102
1.7013e-06	0.0612
2.4245e-06	0.102
3.4551e-06	0.1122
4.9239e-06	0.0816
7.017e-06	0.051
1e-05	0.051
1e-11	0.9082
1.4251e-11	0.8163
2.0309e-11	0.8571
2.8943e-11	0.898
4.1246e-11	0.8878
5.878e-11	0.8571
8.3768e-11	0.9184
1.1938e-10	0.9184
1.7013e-10	0.8673
2.4245e-10	0.9082
3.4551e-10	0.8163
4.9239e-10	0.8673
7.017e-10	0.8571
1e-09	0.8571
1.4251e-09	0.8673
2.0309e-09	0.8776
2.8943e-09	0.7755
4.1246e-09	0.7347
5.878e-09	0.6531
8.3768e-09	0.5102
1.1938e-08	0.3878
1.7013e-08	0.2551
2.4245e-08	0.0918
3.4551e-08	0.1327
4.9239e-08	0.1633
7.017e-08	0.1224
1e-07	0.0612
1.4251e-07	0.0816
2.0309e-07	0.0714
2.8943e-07	0.0408
4.1246e-07	0.051
5.878e-07	0.0612
8.3768e-07	0.1122
1.1938e-06	0.0918
1.7013e-06	0.0714
2.4245e-06	0.0714
3.4551e-06	0.0918
4.9239e-06	0.0306
7.017e-06	0.0714
1e-05	0.0612
1e-11	0.8878
1.4251e-11	0.8673
2.0309e-11	0.9286
2.8943e-11	0.8061
4.1246e-11	0.9388
5.878e-11	0.898
8.3768e-11	0.8776
1.1938e-10	0.8571
1.7013e-10	0.9082
2.4245e-10	0.898
3.4551e-10	0.8776
4.9239e-10	0.9184
7.017e-10	0.8878
1e-09	0.8776
1.4251e-09	0.8061
2.0309e-09	0.8265
2.8943e-09	0.8163
4.1246e-09	0.8163
5.878e-09	0.6939
8.3768e-09	0.6633
1.1938e-08	0.2959
1.7013e-08	0.2551
2.4245e-08	0.1122
3.4551e-08	0.102
4.9239e-08	0.0714
7.017e-08	0.0408
1e-07	0.1327
1.4251e-07	0.0714
2.0309e-07	0.0918
2.8943e-07	0.0918
4.1246e-07	0.1122
5.878e-07	0.0918
8.3768e-07	0.1429
1.1938e-06	0.1327
1.7013e-06	0.0714
2.4245e-06	0.102
3.4551e-06	0.1327
4.9239e-06	0.0918
7.017e-06	0.0612
1e-05	0.0816
1e-11	0.8673
1.4251e-11	0.9286
2.0309e-11	0.8673
2.8943e-11	0.8571
4.1246e-11	0.9184
5.878e-11	0.7959
8.3768e-11	0.8673
1.1938e-10	0.8571
1.7013e-10	0.8571
2.4245e-10	0.8776
3.4551e-10	0.8265
4.9239e-10	0.9082
7.017e-10	0.8163
1e-09	0.8878
1.4251e-09	0.898
2.0309e-09	0.7959
2.8943e-09	0.7449
4.1246e-09	0.7755
5.878e-09	0.6429
8.3768e-09	0.4184
1.1938e-08	0.4184
1.7013e-08	0.2245
2.4245e-08	0.1531
3.4551e-08	0.1531
4.9239e-08	0.1429
7.017e-08	0.0918
1e-07	0.1122
1.4251e-07	0.1224
2.0309e-07	0.0408
2.8943e-07	0.0816
4.1246e-07	0.1224
5.878e-07	0.0816
8.3768e-07	0.0612
1.1938e-06	0.1327
1.7013e-06	0.0714
2.4245e-06	0.102
3.4551e-06	0.102
4.9239e-06	0.1122
7.017e-06	0.0612
1e-05	0.0816
1e-11	0.898
1.4251e-11	0.8469
2.0309e-11	0.8367
2.8943e-11	0.8776
4.1246e-11	0.9184
5.878e-11	0.8878
8.3768e-11	0.9082
1.1938e-10	0.8163
1.7013e-10	0.8571
2.4245e-10	0.898
3.4551e-10	0.9082
4.9239e-10	0.9592
7.017e-10	0.898
1e-09	0.8878
1.4251e-09	0.898
2.0309e-09	0.8673
2.8943e-09	0.9082
4.1246e-09	0.7653
5.878e-09	0.6939
8.3768e-09	0.5204
1.1938e-08	0.3163
1.7013e-08	0.2449
2.4245e-08	0.1531
3.4551e-08	0.1327
4.9239e-08	0.1224
7.017e-08	0.0918
1e-07	0.1122
1.4251e-07	0.1429
2.0309e-07	0.1224
2.8943e-07	0.1327
4.1246e-07	0.102
5.878e-07	0.102
8.3768e-07	0.0204
1.1938e-06	0.0918
1.7013e-06	0.0714
2.4245e-06	0.0918
3.4551e-06	0.1327
4.9239e-06	0.0918
7.017e-06	0.0816
1e-05	0.1122
1e-11	0.7959
1.4251e-11	0.8776
2.0309e-11	0.8776
2.8943e-11	0.8163
4.1246e-11	0.9184
5.878e-11	0.8878
8.3768e-11	0.8776
1.1938e-10	0.9592
1.7013e-10	0.9388
2.4245e-10	0.8367
3.4551e-10	0.8673
4.9239e-10	0.9286
7.017e-10	0.8776
1e-09	0.8673
1.4251e-09	0.8367
2.0309e-09	0.8571
2.8943e-09	0.7551
4.1246e-09	0.7755
5.878e-09	0.6633
8.3768e-09	0.6224
1.1938e-08	0.2857
1.7013e-08	0.1531
2.4245e-08	0.1939
3.4551e-08	0.1429
4.9239e-08	0.1327
7.017e-08	0.102
1e-07	0.0918
1.4251e-07	0.2041
2.0309e-07	0.1224
2.8943e-07	0.1633
4.1246e-07	0.102
5.878e-07	0.1633
8.3768e-07	0.0816
1.1938e-06	0.0714
1.7013e-06	0.0612
2.4245e-06	0.0816
3.4551e-06	0.1122
4.9239e-06	0.0408
7.017e-06	0.0918
1e-05	0.0816
1e-11	0.8469
1.4251e-11	0.9796
2.0309e-11	0.8673
2.8943e-11	0.8673
4.1246e-11	0.8878
5.878e-11	0.8571
8.3768e-11	0.9082
1.1938e-10	0.9184
1.7013e-10	0.898
2.4245e-10	0.8469
3.4551e-10	0.7857
4.9239e-10	0.8878
7.017e-10	0.949
1e-09	0.8776
1.4251e-09	0.9694
2.0309e-09	0.8367
2.8943e-09	0.8673
4.1246e-09	0.6939
5.878e-09	0.5306
8.3768e-09	0.4592
1.1938e-08	0.3367
1.7013e-08	0.2245
2.4245e-08	0.1837
3.4551e-08	0.1122
4.9239e-08	0.1122
7.017e-08	0.102
1e-07	0.1429
1.4251e-07	0.1531
2.0309e-07	0.0408
2.8943e-07	0.0816
4.1246e-07	0.0714
5.878e-07	0.1327
8.3768e-07	0.0612
1.1938e-06	0.102
1.7013e-06	0.0816
2.4245e-06	0.0816
3.4551e-06	0.051
4.9239e-06	0.0612
7.017e-06	0.102
1e-05	0.051

## Sheet: Supple3_intrinsic_binding_kDeff
[catAb]/kD = 1.0		[catAb]/kD = 0.3		[catAb]/kD = 0.1		[catAb]/kD = 0.03		[catAb]/kD = 0.01
kD_catenator	kD_eff	kD_catenator	kD_eff	kD_catenator	kD_eff	kD_catenator	kD_eff	kD_catenator	kD_eff
1e-11	1.3872e-11	1e-11	2.3535e-11	1e-11	1.0786e-10	1e-11	5.148e-10	1e-11	9.898e-10
1.4251e-11	1.3352e-11	1.4251e-11	2.3721e-11	1.4251e-11	1.0689e-10	1.4251e-11	5.162e-10	1.4251e-11	9.9291e-10
2.0309e-11	1.2705e-11	2.0309e-11	2.3757e-11	2.0309e-11	1.0793e-10	2.0309e-11	5.1419e-10	2.0309e-11	9.911e-10
2.8943e-11	1.1878e-11	2.8943e-11	2.2586e-11	2.8943e-11	1.069e-10	2.8943e-11	5.1451e-10	2.8943e-11	9.8677e-10
4.1246e-11	1.0793e-11	4.1246e-11	2.1675e-11	4.1246e-11	1.0704e-10	4.1246e-11	5.111e-10	4.1246e-11	9.8879e-10
5.878e-11	9.3617e-12	5.878e-11	2.005e-11	5.878e-11	1.0531e-10	5.878e-11	5.1358e-10	5.878e-11	9.9455e-10
8.3768e-11	7.4592e-12	8.3768e-11	1.8236e-11	8.3768e-11	1.056e-10	8.3768e-11	5.1239e-10	8.3768e-11	1.0067e-09
1.1938e-10	5.3321e-12	1.1938e-10	1.6117e-11	1.1938e-10	1.0204e-10	1.1938e-10	5.1435e-10	1.1938e-10	1.0186e-09
1.7013e-10	3.1689e-12	1.7013e-10	1.2994e-11	1.7013e-10	9.9829e-11	1.7013e-10	5.1471e-10	1.7013e-10	1.0302e-09
2.4245e-10	1.9044e-12	2.4245e-10	1.019e-11	2.4245e-10	9.6731e-11	2.4245e-10	5.1229e-10	2.4245e-10	1.0506e-09
3.4551e-10	1.5794e-12	3.4551e-10	8.2791e-12	3.4551e-10	9.0913e-11	3.4551e-10	5.1372e-10	3.4551e-10	1.0889e-09
4.9239e-10	2.0795e-12	4.9239e-10	8.1119e-12	4.9239e-10	8.6996e-11	4.9239e-10	5.1684e-10	4.9239e-10	1.1266e-09
7.017e-10	3.3971e-12	7.017e-10	1.0935e-11	7.017e-10	8.5065e-11	7.017e-10	5.2271e-10	7.017e-10	1.2339e-09
1e-09	5.2239e-12	1e-09	1.6797e-11	1e-09	9.2296e-11	1e-09	5.6178e-10	1e-09	1.4252e-09
1.4251e-09	8.1423e-12	1.4251e-09	2.7242e-11	1.4251e-09	1.1598e-10	1.4251e-09	6.8008e-10	1.4251e-09	1.9148e-09
2.0309e-09	1.3426e-11	2.0309e-09	4.2767e-11	2.0309e-09	1.6984e-10	2.0309e-09	9.7231e-10	2.0309e-09	3.2415e-09
2.8943e-09	2.0836e-11	2.8943e-09	6.9178e-11	2.8943e-09	2.7731e-10	2.8943e-09	1.7659e-09	2.8943e-09	9.0059e-09
4.1246e-09	3.3082e-11	4.1246e-09	1.1335e-10	4.1246e-09	4.929e-10	4.1246e-09	4.7574e-09	4.1246e-09	4.0579e-08
5.878e-09	5.2446e-11	5.878e-09	1.8705e-10	5.878e-09	9.935e-10	5.878e-09	1.3649e-08	5.878e-09	8.1054e-08
8.3768e-09	8.2359e-11	8.3768e-09	3.1229e-10	8.3768e-09	2.2261e-09	8.3768e-09	2.1108e-08	8.3768e-09	9.2264e-08
1.1938e-08	1.3059e-10	1.1938e-08	5.4801e-10	1.1938e-08	4.2985e-09	1.1938e-08	2.5428e-08	1.1938e-08	9.4551e-08
1.7013e-08	2.0251e-10	1.7013e-08	9.5289e-10	1.7013e-08	6.3562e-09	1.7013e-08	2.7695e-08	1.7013e-08	9.7096e-08
2.4245e-08	3.1208e-10	2.4245e-08	1.5174e-09	2.4245e-08	7.6215e-09	2.4245e-08	2.8951e-08	2.4245e-08	9.9252e-08
3.4551e-08	4.5094e-10	3.4551e-08	2.0477e-09	3.4551e-08	8.5655e-09	3.4551e-08	3.0255e-08	3.4551e-08	9.7457e-08
4.9239e-08	6.0384e-10	4.9239e-08	2.441e-09	4.9239e-08	9.1896e-09	4.9239e-08	3.0537e-08	4.9239e-08	1.0042e-07
7.017e-08	7.2606e-10	7.017e-08	2.7195e-09	7.017e-08	9.4713e-09	7.017e-08	3.1015e-08	7.017e-08	1.0042e-07
1e-07	8.2494e-10	1e-07	2.8801e-09	1e-07	9.7532e-09	1e-07	3.1387e-08	1e-07	1.0083e-07
1.4251e-07	8.8963e-10	1.4251e-07	2.9961e-09	1.4251e-07	9.7755e-09	1.4251e-07	3.1704e-08	1.4251e-07	9.9654e-08
2.0309e-07	9.2941e-10	2.0309e-07	3.0487e-09	2.0309e-07	9.9271e-09	2.0309e-07	3.1366e-08	2.0309e-07	9.9152e-08
2.8943e-07	9.5349e-10	2.8943e-07	3.0932e-09	2.8943e-07	9.9381e-09	2.8943e-07	3.1606e-08	2.8943e-07	9.782e-08
4.1246e-07	9.7269e-10	4.1246e-07	3.1281e-09	4.1246e-07	1.0055e-08	4.1246e-07	3.2079e-08	4.1246e-07	9.9604e-08
5.878e-07	9.8677e-10	5.878e-07	3.1231e-09	5.878e-07	9.9764e-09	5.878e-07	3.1218e-08	5.878e-07	9.9152e-08
8.3768e-07	9.8861e-10	8.3768e-07	3.1381e-09	8.3768e-07	9.996e-09	8.3768e-07	3.176e-08	8.3768e-07	9.7699e-08
1.1938e-06	9.8753e-10	1.1938e-06	3.157e-09	1.1938e-06	1.005e-08	1.1938e-06	3.1611e-08	1.1938e-06	9.9002e-08
1.7013e-06	9.9678e-10	1.7013e-06	3.1585e-09	1.7013e-06	1.0005e-08	1.7013e-06	3.1226e-08	1.7013e-06	1.0021e-07
2.4245e-06	9.953e-10	2.4245e-06	3.1501e-09	2.4245e-06	9.9996e-09	2.4245e-06	3.1087e-08	2.4245e-06	9.9202e-08
3.4551e-06	1.0029e-09	3.4551e-06	3.1431e-09	3.4551e-06	1.0051e-08	3.4551e-06	3.1878e-08	3.4551e-06	1.0093e-07
4.9239e-06	1.0043e-09	4.9239e-06	3.141e-09	4.9239e-06	9.9236e-09	4.9239e-06	3.159e-08	4.9239e-06	9.8977e-08
7.017e-06	9.984e-10	7.017e-06	3.139e-09	7.017e-06	1.0004e-08	7.017e-06	3.2046e-08	7.017e-06	9.863e-08
1e-05	9.9193e-10	1e-05	3.1763e-09	1e-05	9.9444e-09	1e-05	3.126e-08	1e-05	1.0216e-07
