# Supplementary material for: Noncovalent antibody catenation on a target surface greatly increases the antigen-binding avidity
Source: eLife. 2023 May 30;12:e81646. doi: 10.7554/eLife.81646 (PMC10229114; doi:10.7554/eLife.81646)
Supplement: Figure 4—source data 1. [file elife-81646-fig4-data1.xlsx]

## Sheet: Data2_regularly_spaced_BO
Square			Triangular			Hexagonal			Control
kD_catenator	Binding Occupancy	stdev of Binding Occupancy	kD_catenator	Binding Occupancy	stdev of Binding Occupancy	kD_catenator	Binding Occupancy	stdev of Binding Occupancy	kD_catenator	Binding Occupancy
1e-11	0.8027	0.0466	1e-11	0.8878	0.0364	1e-11	0.8767	0.0398	1e-11	0.1
1.4251e-11	0.8007	0.0476	1.4251e-11	0.8881	0.0366	1.4251e-11	0.877	0.0386	2.5642e-07	0.1
2.0309e-11	0.8017	0.0479	2.0309e-11	0.8884	0.0363	2.0309e-11	0.8767	0.0396	5.1283e-07	0.1
2.8943e-11	0.8025	0.0454	2.8943e-11	0.888	0.0363	2.8943e-11	0.876	0.0403	7.6924e-07	0.1
4.1246e-11	0.8016	0.0472	4.1246e-11	0.8883	0.0358	4.1246e-11	0.8771	0.04	1.0256e-06	0.1
5.878e-11	0.8019	0.0474	5.878e-11	0.8901	0.0364	5.878e-11	0.8782	0.0393	1.2821e-06	0.1
8.3768e-11	0.8014	0.0478	8.3768e-11	0.8913	0.0357	8.3768e-11	0.8782	0.0389	1.5385e-06	0.1
1.1938e-10	0.8023	0.0476	1.1938e-10	0.8924	0.0357	1.1938e-10	0.8781	0.0389	1.7949e-06	0.1
1.7013e-10	0.7999	0.0477	1.7013e-10	0.8934	0.0346	1.7013e-10	0.8802	0.0385	2.0513e-06	0.1
2.4245e-10	0.7993	0.0478	2.4245e-10	0.8967	0.0337	2.4245e-10	0.8803	0.0391	2.3077e-06	0.1
3.4551e-10	0.7977	0.048	3.4551e-10	0.8985	0.0336	3.4551e-10	0.8803	0.0387	2.5641e-06	0.1
4.9239e-10	0.7935	0.0493	4.9239e-10	0.9023	0.0328	4.9239e-10	0.8797	0.0389	2.8205e-06	0.1
7.017e-10	0.7872	0.0511	7.017e-10	0.903	0.0326	7.017e-10	0.8763	0.0394	3.0769e-06	0.1
1e-09	0.7757	0.0535	1e-09	0.9023	0.0324	1e-09	0.8716	0.0395	3.3333e-06	0.1
1.4251e-09	0.7592	0.0553	1.4251e-09	0.895	0.0333	1.4251e-09	0.8583	0.0425	3.5897e-06	0.1
2.0309e-09	0.7282	0.0584	2.0309e-09	0.8791	0.0357	2.0309e-09	0.8329	0.0448	3.8462e-06	0.1
2.8943e-09	0.6774	0.0639	2.8943e-09	0.8518	0.0399	2.8943e-09	0.7896	0.0506	4.1026e-06	0.1
4.1246e-09	0.6009	0.0711	4.1246e-09	0.8077	0.0453	4.1246e-09	0.7228	0.0584	4.359e-06	0.1
5.878e-09	0.4937	0.0777	5.878e-09	0.7413	0.0526	5.878e-09	0.6186	0.0678	4.6154e-06	0.1
8.3768e-09	0.3627	0.0778	8.3768e-09	0.6448	0.0619	8.3768e-09	0.4787	0.0744	4.8718e-06	0.1
1.1938e-08	0.2508	0.0655	1.1938e-08	0.5129	0.0722	1.1938e-08	0.3268	0.0724	5.1282e-06	0.1
1.7013e-08	0.1817	0.0538	1.7013e-08	0.3602	0.074	1.7013e-08	0.2185	0.0599	5.3846e-06	0.1
2.4245e-08	0.1428	0.045	2.4245e-08	0.2396	0.0625	2.4245e-08	0.1604	0.0487	5.641e-06	0.1
3.4551e-08	0.1229	0.039	3.4551e-08	0.1719	0.0511	3.4551e-08	0.1328	0.0409	5.8974e-06	0.1
4.9239e-08	0.1105	0.035	4.9239e-08	0.1369	0.0429	4.9239e-08	0.1168	0.0367	6.1538e-06	0.1
7.017e-08	0.1039	0.0331	7.017e-08	0.1193	0.0373	7.017e-08	0.1073	0.0344	6.4103e-06	0.1
1e-07	0.1005	0.0314	1e-07	0.1088	0.0344	1e-07	0.1013	0.0318	6.6667e-06	0.1
1.4251e-07	0.0973	0.0308	1.4251e-07	0.1033	0.0326	1.4251e-07	0.0984	0.0318	6.9231e-06	0.1
2.0309e-07	0.0956	0.0304	2.0309e-07	0.099	0.0316	2.0309e-07	0.0964	0.0306	7.1795e-06	0.1
2.8943e-07	0.0942	0.0302	2.8943e-07	0.0967	0.0315	2.8943e-07	0.0942	0.0301	7.4359e-06	0.1
4.1246e-07	0.0931	0.0296	4.1246e-07	0.0944	0.0295	4.1246e-07	0.0931	0.0298	7.6923e-06	0.1
5.878e-07	0.0914	0.0297	5.878e-07	0.0936	0.03	5.878e-07	0.0928	0.0292	7.9487e-06	0.1
8.3768e-07	0.0922	0.0294	8.3768e-07	0.0925	0.0291	8.3768e-07	0.092	0.0289	8.2051e-06	0.1
1.1938e-06	0.0912	0.0289	1.1938e-06	0.0918	0.0294	1.1938e-06	0.091	0.0288	8.4615e-06	0.1
1.7013e-06	0.0914	0.029	1.7013e-06	0.0916	0.029	1.7013e-06	0.0916	0.0294	8.718e-06	0.1
2.4245e-06	0.0907	0.0289	2.4245e-06	0.0909	0.0288	2.4245e-06	0.0911	0.0292	8.9744e-06	0.1
3.4551e-06	0.0904	0.0289	3.4551e-06	0.091	0.0287	3.4551e-06	0.0912	0.0292	9.2308e-06	0.1
4.9239e-06	0.0913	0.0291	4.9239e-06	0.0905	0.029	4.9239e-06	0.0911	0.0289	9.4872e-06	0.1
7.017e-06	0.0912	0.0289	7.017e-06	0.0918	0.0289	7.017e-06	0.0914	0.0289	9.7436e-06	0.1
1e-05	0.0907	0.0288	1e-05	0.0909	0.029	1e-05	0.0914	0.0296	1e-05	0.1
1e-11	0.898
1.4251e-11	0.898
2.0309e-11	0.9184
2.8943e-11	0.898
4.1246e-11	0.8571
5.878e-11	0.8469
8.3768e-11	0.8878
1.1938e-10	0.8673
1.7013e-10	0.8469
2.4245e-10	0.9286
3.4551e-10	0.8469
4.9239e-10	0.898
7.017e-10	0.8163
1e-09	0.9286
1.4251e-09	0.8878
2.0309e-09	0.7857
2.8943e-09	0.7449
4.1246e-09	0.6939
5.878e-09	0.602
8.3768e-09	0.4082
1.1938e-08	0.4184
1.7013e-08	0.1735
2.4245e-08	0.1633
3.4551e-08	0.2143
4.9239e-08	0.1122
7.017e-08	0.1122
1e-07	0.0816
1.4251e-07	0.0918
2.0309e-07	0.0918
2.8943e-07	0.0816
4.1246e-07	0.0918
5.878e-07	0.102
8.3768e-07	0.1122
1.1938e-06	0.0816
1.7013e-06	0.0918
2.4245e-06	0.0816
3.4551e-06	0.0102
4.9239e-06	0.1122
7.017e-06	0.102
1e-05	0.051
1e-11	0.8673
1.4251e-11	0.898
2.0309e-11	0.9082
2.8943e-11	0.898
4.1246e-11	0.7551
5.878e-11	0.8469
8.3768e-11	0.8469
1.1938e-10	0.898
1.7013e-10	0.8673
2.4245e-10	0.949
3.4551e-10	0.9184
4.9239e-10	0.8776
7.017e-10	0.9082
1e-09	0.8878
1.4251e-09	0.8469
2.0309e-09	0.8265
2.8943e-09	0.8367
4.1246e-09	0.6735
5.878e-09	0.6429
8.3768e-09	0.6122
1.1938e-08	0.2347
1.7013e-08	0.2449
2.4245e-08	0.1735
3.4551e-08	0.051
4.9239e-08	0.102
7.017e-08	0.1327
1e-07	0.1122
1.4251e-07	0.1224
2.0309e-07	0.0714
2.8943e-07	0.0714
4.1246e-07	0.102
5.878e-07	0.1224
8.3768e-07	0.0816
1.1938e-06	0.102
1.7013e-06	0.0612
2.4245e-06	0.102
3.4551e-06	0.0612
4.9239e-06	0.1224
7.017e-06	0.1122
1e-05	0.1429
1e-11	0.9082
1.4251e-11	0.8776
2.0309e-11	0.8571
2.8943e-11	0.8776
4.1246e-11	0.8163
5.878e-11	0.8878
8.3768e-11	0.8878
1.1938e-10	0.898
1.7013e-10	0.7857
2.4245e-10	0.8878
3.4551e-10	0.8469
4.9239e-10	0.898
7.017e-10	0.9082
1e-09	0.898
1.4251e-09	0.7653
2.0309e-09	0.8469
2.8943e-09	0.898
4.1246e-09	0.7143
5.878e-09	0.5408
8.3768e-09	0.4286
1.1938e-08	0.3469
1.7013e-08	0.2653
2.4245e-08	0.2551
3.4551e-08	0.0918
4.9239e-08	0.0918
7.017e-08	0.1837
1e-07	0.051
1.4251e-07	0.102
2.0309e-07	0.0918
2.8943e-07	0.1122
4.1246e-07	0.1224
5.878e-07	0.1429
8.3768e-07	0.0918
1.1938e-06	0.0714
1.7013e-06	0.0408
2.4245e-06	0.0612
3.4551e-06	0.1224
4.9239e-06	0.0918
7.017e-06	0.051
1e-05	0.1327
1e-11	0.8469
1.4251e-11	0.8776
2.0309e-11	0.8776
2.8943e-11	0.9286
4.1246e-11	0.8673
5.878e-11	0.8265
8.3768e-11	0.8367
1.1938e-10	0.8878
1.7013e-10	0.8776
2.4245e-10	0.8776
3.4551e-10	0.8571
4.9239e-10	0.9082
7.017e-10	0.8673
1e-09	0.8469
1.4251e-09	0.8571
2.0309e-09	0.8367
2.8943e-09	0.8061
4.1246e-09	0.7347
5.878e-09	0.5612
8.3768e-09	0.4592
1.1938e-08	0.2653
1.7013e-08	0.3163
2.4245e-08	0.1429
3.4551e-08	0.1735
4.9239e-08	0.102
7.017e-08	0.0816
1e-07	0.1735
1.4251e-07	0.0918
2.0309e-07	0.1122
2.8943e-07	0.1122
4.1246e-07	0.102
5.878e-07	0.0612
8.3768e-07	0.1531
1.1938e-06	0.0714
1.7013e-06	0.0408
2.4245e-06	0.1122
3.4551e-06	0.1122
4.9239e-06	0.0918
7.017e-06	0.1122
1e-05	0.1122
1e-11	0.8265
1.4251e-11	0.8265
2.0309e-11	0.8878
2.8943e-11	0.8571
4.1246e-11	0.8163
5.878e-11	0.8776
8.3768e-11	0.8673
1.1938e-10	0.9082
1.7013e-10	0.898
2.4245e-10	0.8878
3.4551e-10	0.8367
4.9239e-10	0.9082
7.017e-10	0.8163
1e-09	0.8878
1.4251e-09	0.8163
2.0309e-09	0.898
2.8943e-09	0.7653
4.1246e-09	0.7653
5.878e-09	0.6531
8.3768e-09	0.3673
1.1938e-08	0.2857
1.7013e-08	0.2041
2.4245e-08	0.1224
3.4551e-08	0.0918
4.9239e-08	0.1224
7.017e-08	0.102
1e-07	0.1633
1.4251e-07	0.0714
2.0309e-07	0.051
2.8943e-07	0.0714
4.1246e-07	0.102
5.878e-07	0.1224
8.3768e-07	0.1224
1.1938e-06	0.0918
1.7013e-06	0.0612
2.4245e-06	0.102
3.4551e-06	0.1224
4.9239e-06	0.102
7.017e-06	0.0918
1e-05	0.0714
1e-11	0.8878
1.4251e-11	0.8673
2.0309e-11	0.8265
2.8943e-11	0.8878
4.1246e-11	0.9286
5.878e-11	0.898
8.3768e-11	0.9388
1.1938e-10	0.8265
1.7013e-10	0.8878
2.4245e-10	0.898
3.4551e-10	0.8061
4.9239e-10	0.9388
7.017e-10	0.898
1e-09	0.8571
1.4251e-09	0.8367
2.0309e-09	0.8571
2.8943e-09	0.7653
4.1246e-09	0.6939
5.878e-09	0.551
8.3768e-09	0.449
1.1938e-08	0.3061
1.7013e-08	0.2755
2.4245e-08	0.3163
3.4551e-08	0.0714
4.9239e-08	0.1633
7.017e-08	0.1122
1e-07	0.0918
1.4251e-07	0.102
2.0309e-07	0.102
2.8943e-07	0.1327
4.1246e-07	0.0714
5.878e-07	0.0816
8.3768e-07	0.051
1.1938e-06	0.102
1.7013e-06	0.1224
2.4245e-06	0.0816
3.4551e-06	0.0408
4.9239e-06	0.1939
7.017e-06	0.0816
1e-05	0.051
1e-11	0.8776
1.4251e-11	0.8061
2.0309e-11	0.8061
2.8943e-11	0.8878
4.1246e-11	0.8673
5.878e-11	0.898
8.3768e-11	0.8367
1.1938e-10	0.8469
1.7013e-10	0.9286
2.4245e-10	0.8469
3.4551e-10	0.8469
4.9239e-10	0.9286
7.017e-10	0.8878
1e-09	0.9286
1.4251e-09	0.8469
2.0309e-09	0.8469
2.8943e-09	0.8163
4.1246e-09	0.6837
5.878e-09	0.6837
8.3768e-09	0.3469
1.1938e-08	0.3061
1.7013e-08	0.2245
2.4245e-08	0.2143
3.4551e-08	0.1429
4.9239e-08	0.1429
7.017e-08	0.102
1e-07	0.1837
1.4251e-07	0.0714
2.0309e-07	0.102
2.8943e-07	0.1531
4.1246e-07	0.102
5.878e-07	0.1224
8.3768e-07	0.0816
1.1938e-06	0.0612
1.7013e-06	0.0714
2.4245e-06	0.1122
3.4551e-06	0.0612
4.9239e-06	0.0816
7.017e-06	0.102
1e-05	0.0918
1e-11	0.8163
1.4251e-11	0.898
2.0309e-11	0.8265
2.8943e-11	0.8673
4.1246e-11	0.8571
5.878e-11	0.898
8.3768e-11	0.9286
1.1938e-10	0.8367
1.7013e-10	0.9184
2.4245e-10	0.898
3.4551e-10	0.8571
4.9239e-10	0.898
7.017e-10	0.9082
1e-09	0.8061
1.4251e-09	0.8571
2.0309e-09	0.8673
2.8943e-09	0.7857
4.1246e-09	0.7551
5.878e-09	0.5306
8.3768e-09	0.5102
1.1938e-08	0.2653
1.7013e-08	0.2449
2.4245e-08	0.2449
3.4551e-08	0.1429
4.9239e-08	0.1224
7.017e-08	0.0408
1e-07	0.0714
1.4251e-07	0.1327
2.0309e-07	0.0816
2.8943e-07	0.0714
4.1246e-07	0.102
5.878e-07	0.0408
8.3768e-07	0.051
1.1938e-06	0.0816
1.7013e-06	0.0918
2.4245e-06	0.102
3.4551e-06	0.0408
4.9239e-06	0.1122
7.017e-06	0.102
1e-05	0.1531
1e-11	0.9286
1.4251e-11	0.8265
2.0309e-11	0.8673
2.8943e-11	0.8776
4.1246e-11	0.9184
5.878e-11	0.7959
8.3768e-11	0.949
1.1938e-10	0.9286
1.7013e-10	0.7959
2.4245e-10	0.8163
3.4551e-10	0.9184
4.9239e-10	0.8878
7.017e-10	0.898
1e-09	0.9082
1.4251e-09	0.9082
2.0309e-09	0.8673
2.8943e-09	0.7653
4.1246e-09	0.7755
5.878e-09	0.6939
8.3768e-09	0.5714
1.1938e-08	0.3265
1.7013e-08	0.2041
2.4245e-08	0.0918
3.4551e-08	0.1633
4.9239e-08	0.1531
7.017e-08	0.1837
1e-07	0.0306
1.4251e-07	0.0714
2.0309e-07	0.0714
2.8943e-07	0.102
4.1246e-07	0.1122
5.878e-07	0.0918
8.3768e-07	0.1224
1.1938e-06	0.1122
1.7013e-06	0.1122
2.4245e-06	0.051
3.4551e-06	0.0918
4.9239e-06	0.0714
7.017e-06	0.1224
1e-05	0.1224
1e-11	0.8571
1.4251e-11	0.9082
2.0309e-11	0.9082
2.8943e-11	0.8061
4.1246e-11	0.9082
5.878e-11	0.8776
8.3768e-11	0.8367
1.1938e-10	0.8878
1.7013e-10	0.898
2.4245e-10	0.8776
3.4551e-10	0.8367
4.9239e-10	0.9082
7.017e-10	0.8367
1e-09	0.9082
1.4251e-09	0.9082
2.0309e-09	0.8571
2.8943e-09	0.7449
4.1246e-09	0.7755
5.878e-09	0.6633
8.3768e-09	0.5204
1.1938e-08	0.3673
1.7013e-08	0.2551
2.4245e-08	0.0816
3.4551e-08	0.0918
4.9239e-08	0.1327
7.017e-08	0.1224
1e-07	0.0918
1.4251e-07	0.102
2.0309e-07	0.1122
2.8943e-07	0.0918
4.1246e-07	0.0918
5.878e-07	0.0816
8.3768e-07	0.0612
1.1938e-06	0.051
1.7013e-06	0.1224
2.4245e-06	0.102
3.4551e-06	0.1122
4.9239e-06	0.1122
7.017e-06	0.1122
1e-05	0.0918
1e-11	0.7959
1.4251e-11	0.8673
2.0309e-11	0.8776
2.8943e-11	0.8571
4.1246e-11	0.8776
5.878e-11	0.8878
8.3768e-11	0.8878
1.1938e-10	0.898
1.7013e-10	0.9082
2.4245e-10	0.8776
3.4551e-10	0.8673
4.9239e-10	0.9082
7.017e-10	0.8776
1e-09	0.9286
1.4251e-09	0.8571
2.0309e-09	0.8776
2.8943e-09	0.7959
4.1246e-09	0.6939
5.878e-09	0.6122
8.3768e-09	0.5714
1.1938e-08	0.398
1.7013e-08	0.2347
2.4245e-08	0.1429
3.4551e-08	0.1735
4.9239e-08	0.1327
7.017e-08	0.0816
1e-07	0.1327
1.4251e-07	0.1122
2.0309e-07	0.0714
2.8943e-07	0.0306
4.1246e-07	0.0918
5.878e-07	0.0714
8.3768e-07	0.0612
1.1938e-06	0.1633
1.7013e-06	0.0714
2.4245e-06	0.1122
3.4551e-06	0.0816
4.9239e-06	0.1327
7.017e-06	0.0918
1e-05	0.0816
1e-11	0.8571
1.4251e-11	0.8571
2.0309e-11	0.8061
2.8943e-11	0.9694
4.1246e-11	0.8878
5.878e-11	0.9286
8.3768e-11	0.8878
1.1938e-10	0.8878
1.7013e-10	0.8878
2.4245e-10	0.8469
3.4551e-10	0.8061
4.9239e-10	0.8673
7.017e-10	0.898
1e-09	0.9184
1.4251e-09	0.8776
2.0309e-09	0.8469
2.8943e-09	0.7551
4.1246e-09	0.6939
5.878e-09	0.6939
8.3768e-09	0.5306
1.1938e-08	0.3061
1.7013e-08	0.2449
2.4245e-08	0.1224
3.4551e-08	0.0816
4.9239e-08	0.0918
7.017e-08	0.102
1e-07	0.0714
1.4251e-07	0.0816
2.0309e-07	0.102
2.8943e-07	0.051
4.1246e-07	0.1122
5.878e-07	0.0714
8.3768e-07	0.102
1.1938e-06	0.102
1.7013e-06	0.0918
2.4245e-06	0.0816
3.4551e-06	0.0918
4.9239e-06	0.051
7.017e-06	0.102
1e-05	0.0306
1e-11	0.8571
1.4251e-11	0.7755
2.0309e-11	0.949
2.8943e-11	0.8776
4.1246e-11	0.898
5.878e-11	0.8571
8.3768e-11	0.8878
1.1938e-10	0.8571
1.7013e-10	0.8673
2.4245e-10	0.9082
3.4551e-10	0.8571
4.9239e-10	0.8469
7.017e-10	0.9082
1e-09	0.8878
1.4251e-09	0.8673
2.0309e-09	0.7755
2.8943e-09	0.7857
4.1246e-09	0.6224
5.878e-09	0.6327
8.3768e-09	0.4796
1.1938e-08	0.3571
1.7013e-08	0.1327
2.4245e-08	0.1429
3.4551e-08	0.0816
4.9239e-08	0.1224
7.017e-08	0.0714
1e-07	0.102
1.4251e-07	0.0714
2.0309e-07	0.0714
2.8943e-07	0.0918
4.1246e-07	0.0612
5.878e-07	0.1224
8.3768e-07	0.0918
1.1938e-06	0.0816
1.7013e-06	0.1327
2.4245e-06	0.0714
3.4551e-06	0.0816
4.9239e-06	0.0612
7.017e-06	0.1429
1e-05	0.051
1e-11	0.9898
1.4251e-11	0.8265
2.0309e-11	0.8673
2.8943e-11	0.9184
4.1246e-11	0.9082
5.878e-11	0.8878
8.3768e-11	0.8571
1.1938e-10	0.8265
1.7013e-10	0.8571
2.4245e-10	0.9286
3.4551e-10	0.8878
4.9239e-10	0.9184
7.017e-10	0.9082
1e-09	0.8469
1.4251e-09	0.8878
2.0309e-09	0.8163
2.8943e-09	0.7653
4.1246e-09	0.7245
5.878e-09	0.6939
8.3768e-09	0.5408
1.1938e-08	0.2449
1.7013e-08	0.2653
2.4245e-08	0.1633
3.4551e-08	0.0816
4.9239e-08	0.102
7.017e-08	0.1531
1e-07	0.1531
1.4251e-07	0.0714
2.0309e-07	0.102
2.8943e-07	0.0918
4.1246e-07	0.1122
5.878e-07	0.1122
8.3768e-07	0.1327
1.1938e-06	0.102
1.7013e-06	0.102
2.4245e-06	0.102
3.4551e-06	0.0714
4.9239e-06	0.0816
7.017e-06	0.0612
1e-05	0.0714
1e-11	0.9388
1.4251e-11	0.898
2.0309e-11	0.8367
2.8943e-11	0.8673
4.1246e-11	0.8673
5.878e-11	0.9286
8.3768e-11	0.8265
1.1938e-10	0.898
1.7013e-10	0.8776
2.4245e-10	0.8571
3.4551e-10	0.8878
4.9239e-10	0.9286
7.017e-10	0.8776
1e-09	0.8265
1.4251e-09	0.8061
2.0309e-09	0.9082
2.8943e-09	0.7959
4.1246e-09	0.7041
5.878e-09	0.6837
8.3768e-09	0.5612
1.1938e-08	0.2347
1.7013e-08	0.1837
2.4245e-08	0.1531
3.4551e-08	0.2245
4.9239e-08	0.1327
7.017e-08	0.1429
1e-07	0.1224
1.4251e-07	0.051
2.0309e-07	0.1122
2.8943e-07	0.0816
4.1246e-07	0.102
5.878e-07	0.1327
8.3768e-07	0.1327
1.1938e-06	0.0612
1.7013e-06	0.1327
2.4245e-06	0.0918
3.4551e-06	0.0714
4.9239e-06	0.0918
7.017e-06	0.0918
1e-05	0.1327
1e-11	0.8673
1.4251e-11	0.9082
2.0309e-11	0.8367
2.8943e-11	0.898
4.1246e-11	0.9082
5.878e-11	0.9694
8.3768e-11	0.9082
1.1938e-10	0.898
1.7013e-10	0.8776
2.4245e-10	0.8469
3.4551e-10	0.898
4.9239e-10	0.8367
7.017e-10	0.898
1e-09	0.8571
1.4251e-09	0.8163
2.0309e-09	0.8878
2.8943e-09	0.8469
4.1246e-09	0.7755
5.878e-09	0.602
8.3768e-09	0.5
1.1938e-08	0.3571
1.7013e-08	0.1531
2.4245e-08	0.102
3.4551e-08	0.1327
4.9239e-08	0.0816
7.017e-08	0.0714
1e-07	0.1224
1.4251e-07	0.102
2.0309e-07	0.0918
2.8943e-07	0.1224
4.1246e-07	0.0612
5.878e-07	0.1122
8.3768e-07	0.0612
1.1938e-06	0.0816
1.7013e-06	0.0612
2.4245e-06	0.1224
3.4551e-06	0.102
4.9239e-06	0.102
7.017e-06	0.1122
1e-05	0.0408
1e-11	0.8163
1.4251e-11	0.8776
2.0309e-11	0.9184
2.8943e-11	0.8367
4.1246e-11	0.9082
5.878e-11	0.9184
8.3768e-11	0.8367
1.1938e-10	0.9184
1.7013e-10	0.8265
2.4245e-10	0.8469
3.4551e-10	0.8367
4.9239e-10	0.8878
7.017e-10	0.8367
1e-09	0.8469
1.4251e-09	0.8571
2.0309e-09	0.8265
2.8943e-09	0.7347
4.1246e-09	0.7143
5.878e-09	0.6327
8.3768e-09	0.449
1.1938e-08	0.3776
1.7013e-08	0.1429
2.4245e-08	0.1633
3.4551e-08	0.0306
4.9239e-08	0.0612
7.017e-08	0.0714
1e-07	0.0816
1.4251e-07	0.0714
2.0309e-07	0.102
2.8943e-07	0.0918
4.1246e-07	0.0918
5.878e-07	0.0714
8.3768e-07	0.0612
1.1938e-06	0.0714
1.7013e-06	0.102
2.4245e-06	0.1224
3.4551e-06	0.102
4.9239e-06	0.051
7.017e-06	0.0612
1e-05	0.0408
1e-11	0.9184
1.4251e-11	0.8878
2.0309e-11	0.8571
2.8943e-11	0.9592
4.1246e-11	0.9592
5.878e-11	0.9388
8.3768e-11	0.898
1.1938e-10	0.8571
1.7013e-10	0.949
2.4245e-10	0.8571
3.4551e-10	0.8571
4.9239e-10	0.898
7.017e-10	0.898
1e-09	0.8469
1.4251e-09	0.7857
2.0309e-09	0.7755
2.8943e-09	0.7755
4.1246e-09	0.7551
5.878e-09	0.6429
8.3768e-09	0.4592
1.1938e-08	0.3367
1.7013e-08	0.1837
2.4245e-08	0.0918
3.4551e-08	0.0408
4.9239e-08	0.0408
7.017e-08	0.102
1e-07	0.1122
1.4251e-07	0.1122
2.0309e-07	0.1327
2.8943e-07	0.1429
4.1246e-07	0.0306
5.878e-07	0.0918
8.3768e-07	0.1735
1.1938e-06	0.102
1.7013e-06	0.0612
2.4245e-06	0.102
3.4551e-06	0.1122
4.9239e-06	0.0816
7.017e-06	0.051
1e-05	0.051
1e-11	0.9082
1.4251e-11	0.8163
2.0309e-11	0.8571
2.8943e-11	0.898
4.1246e-11	0.8878
5.878e-11	0.8571
8.3768e-11	0.9184
1.1938e-10	0.9184
1.7013e-10	0.8673
2.4245e-10	0.9082
3.4551e-10	0.8163
4.9239e-10	0.8673
7.017e-10	0.8571
1e-09	0.8571
1.4251e-09	0.8673
2.0309e-09	0.8776
2.8943e-09	0.7755
4.1246e-09	0.7347
5.878e-09	0.6531
8.3768e-09	0.5102
1.1938e-08	0.3878
1.7013e-08	0.2551
2.4245e-08	0.0918
3.4551e-08	0.1327
4.9239e-08	0.1633
7.017e-08	0.1224
1e-07	0.0612
1.4251e-07	0.0816
2.0309e-07	0.0714
2.8943e-07	0.0408
4.1246e-07	0.051
5.878e-07	0.0612
8.3768e-07	0.1122
1.1938e-06	0.0918
1.7013e-06	0.0714
2.4245e-06	0.0714
3.4551e-06	0.0918
4.9239e-06	0.0306
7.017e-06	0.0714
1e-05	0.0612
1e-11	0.8878
1.4251e-11	0.8673
2.0309e-11	0.9286
2.8943e-11	0.8061
4.1246e-11	0.9388
5.878e-11	0.898
8.3768e-11	0.8776
1.1938e-10	0.8571
1.7013e-10	0.9082
2.4245e-10	0.898
3.4551e-10	0.8776
4.9239e-10	0.9184
7.017e-10	0.8878
1e-09	0.8776
1.4251e-09	0.8061
2.0309e-09	0.8265
2.8943e-09	0.8163
4.1246e-09	0.8163
5.878e-09	0.6939
8.3768e-09	0.6633
1.1938e-08	0.2959
1.7013e-08	0.2551
2.4245e-08	0.1122
3.4551e-08	0.102
4.9239e-08	0.0714
7.017e-08	0.0408
1e-07	0.1327
1.4251e-07	0.0714
2.0309e-07	0.0918
2.8943e-07	0.0918
4.1246e-07	0.1122
5.878e-07	0.0918
8.3768e-07	0.1429
1.1938e-06	0.1327
1.7013e-06	0.0714
2.4245e-06	0.102
3.4551e-06	0.1327
4.9239e-06	0.0918
7.017e-06	0.0612
1e-05	0.0816
1e-11	0.8673
1.4251e-11	0.9286
2.0309e-11	0.8673
2.8943e-11	0.8571
4.1246e-11	0.9184
5.878e-11	0.7959
8.3768e-11	0.8673
1.1938e-10	0.8571
1.7013e-10	0.8571
2.4245e-10	0.8776
3.4551e-10	0.8265
4.9239e-10	0.9082
7.017e-10	0.8163
1e-09	0.8878
1.4251e-09	0.898
2.0309e-09	0.7959
2.8943e-09	0.7449
4.1246e-09	0.7755
5.878e-09	0.6429
8.3768e-09	0.4184
1.1938e-08	0.4184
1.7013e-08	0.2245
2.4245e-08	0.1531
3.4551e-08	0.1531
4.9239e-08	0.1429
7.017e-08	0.0918
1e-07	0.1122
1.4251e-07	0.1224
2.0309e-07	0.0408
2.8943e-07	0.0816
4.1246e-07	0.1224
5.878e-07	0.0816
8.3768e-07	0.0612
1.1938e-06	0.1327
1.7013e-06	0.0714
2.4245e-06	0.102
3.4551e-06	0.102
4.9239e-06	0.1122
7.017e-06	0.0612
1e-05	0.0816
1e-11	0.898
1.4251e-11	0.8469
2.0309e-11	0.8367
2.8943e-11	0.8776
4.1246e-11	0.9184
5.878e-11	0.8878
8.3768e-11	0.9082
1.1938e-10	0.8163
1.7013e-10	0.8571
2.4245e-10	0.898
3.4551e-10	0.9082
4.9239e-10	0.9592
7.017e-10	0.898
1e-09	0.8878
1.4251e-09	0.898
2.0309e-09	0.8673
2.8943e-09	0.9082
4.1246e-09	0.7653
5.878e-09	0.6939
8.3768e-09	0.5204
1.1938e-08	0.3163
1.7013e-08	0.2449
2.4245e-08	0.1531
3.4551e-08	0.1327
4.9239e-08	0.1224
7.017e-08	0.0918
1e-07	0.1122
1.4251e-07	0.1429
2.0309e-07	0.1224
2.8943e-07	0.1327
4.1246e-07	0.102
5.878e-07	0.102
8.3768e-07	0.0204
1.1938e-06	0.0918
1.7013e-06	0.0714
2.4245e-06	0.0918
3.4551e-06	0.1327
4.9239e-06	0.0918
7.017e-06	0.0816
1e-05	0.1122
1e-11	0.7959
1.4251e-11	0.8776
2.0309e-11	0.8776
2.8943e-11	0.8163
4.1246e-11	0.9184
5.878e-11	0.8878
8.3768e-11	0.8776
1.1938e-10	0.9592
1.7013e-10	0.9388
2.4245e-10	0.8367
3.4551e-10	0.8673
4.9239e-10	0.9286
7.017e-10	0.8776
1e-09	0.8673
1.4251e-09	0.8367
2.0309e-09	0.8571
2.8943e-09	0.7551
4.1246e-09	0.7755
5.878e-09	0.6633
8.3768e-09	0.6224
1.1938e-08	0.2857
1.7013e-08	0.1531
2.4245e-08	0.1939
3.4551e-08	0.1429
4.9239e-08	0.1327
7.017e-08	0.102
1e-07	0.0918
1.4251e-07	0.2041
2.0309e-07	0.1224
2.8943e-07	0.1633
4.1246e-07	0.102
5.878e-07	0.1633
8.3768e-07	0.0816
1.1938e-06	0.0714
1.7013e-06	0.0612
2.4245e-06	0.0816
3.4551e-06	0.1122
4.9239e-06	0.0408
7.017e-06	0.0918
1e-05	0.0816
1e-11	0.8469
1.4251e-11	0.9796
2.0309e-11	0.8673
2.8943e-11	0.8673
4.1246e-11	0.8878
5.878e-11	0.8571
8.3768e-11	0.9082
1.1938e-10	0.9184
1.7013e-10	0.898
2.4245e-10	0.8469
3.4551e-10	0.7857
4.9239e-10	0.8878
7.017e-10	0.949
1e-09	0.8776
1.4251e-09	0.9694
2.0309e-09	0.8367
2.8943e-09	0.8673
4.1246e-09	0.6939
5.878e-09	0.5306
8.3768e-09	0.4592
1.1938e-08	0.3367
1.7013e-08	0.2245
2.4245e-08	0.1837
3.4551e-08	0.1122
4.9239e-08	0.1122
7.017e-08	0.102
1e-07	0.1429
1.4251e-07	0.1531
2.0309e-07	0.0408
2.8943e-07	0.0816
4.1246e-07	0.0714
5.878e-07	0.1327
8.3768e-07	0.0612
1.1938e-06	0.102
1.7013e-06	0.0816
2.4245e-06	0.0816
3.4551e-06	0.051
4.9239e-06	0.0612
7.017e-06	0.102
1e-05	0.051

## Sheet: Data2_regularly_spaced_kDeff
Square			Triangular			Hexagonal			Control
kD_catenator	kD_eff	stdev of kD_eff	kD_catenator	kD_eff	stdev of kD_eff	kD_catenator	kD_eff	stdev of kD_eff	kD_catenator	kD_eff
1e-11	2.4586e-10	7.2371e-11	1e-11	1.2637e-10	4.616e-11	1e-11	1.4068e-10	5.1775e-11	1e-11	1e-08
1.4251e-11	2.4885e-10	7.4315e-11	1.4251e-11	1.2603e-10	4.6378e-11	1.4251e-11	1.4024e-10	5.0215e-11	2.5642e-07	1e-08
2.0309e-11	2.4735e-10	7.4547e-11	2.0309e-11	1.2565e-10	4.6027e-11	2.0309e-11	1.4067e-10	5.1489e-11	5.1283e-07	1e-08
2.8943e-11	2.4618e-10	7.0487e-11	2.8943e-11	1.2608e-10	4.6029e-11	2.8943e-11	1.4153e-10	5.2541e-11	7.6924e-07	1e-08
4.1246e-11	2.4748e-10	7.3448e-11	4.1246e-11	1.2576e-10	4.5388e-11	4.1246e-11	1.4011e-10	5.2051e-11	1.0256e-06	1e-08
5.878e-11	2.4702e-10	7.3744e-11	5.878e-11	1.235e-10	4.5914e-11	5.878e-11	1.387e-10	5.1011e-11	1.2821e-06	1e-08
8.3768e-11	2.4777e-10	7.4404e-11	8.3768e-11	1.2202e-10	4.4906e-11	8.3768e-11	1.3866e-10	5.0487e-11	1.5385e-06	1e-08
1.1938e-10	2.4644e-10	7.3957e-11	1.1938e-10	1.2058e-10	4.4877e-11	1.1938e-10	1.3885e-10	5.04e-11	1.7949e-06	1e-08
1.7013e-10	2.5016e-10	7.4544e-11	1.7013e-10	1.1926e-10	4.333e-11	1.7013e-10	1.3615e-10	4.9714e-11	2.0513e-06	1e-08
2.4245e-10	2.5114e-10	7.4864e-11	2.4245e-10	1.1519e-10	4.1881e-11	2.4245e-10	1.3602e-10	5.0516e-11	2.3077e-06	1e-08
3.4551e-10	2.5359e-10	7.5499e-11	3.4551e-10	1.1292e-10	4.1658e-11	3.4551e-10	1.3599e-10	4.9932e-11	2.5641e-06	1e-08
4.9239e-10	2.6024e-10	7.8289e-11	4.9239e-10	1.0824e-10	4.0226e-11	4.9239e-10	1.3681e-10	5.0314e-11	2.8205e-06	1e-08
7.017e-10	2.7026e-10	8.2416e-11	7.017e-10	1.074e-10	3.9956e-11	7.017e-10	1.4111e-10	5.1247e-11	3.0769e-06	1e-08
1e-09	2.8912e-10	8.8951e-11	1e-09	1.0823e-10	3.9768e-11	1e-09	1.4727e-10	5.1962e-11	3.3333e-06	1e-08
1.4251e-09	3.1726e-10	9.5946e-11	1.4251e-09	1.1728e-10	4.1629e-11	1.4251e-09	1.6513e-10	5.7671e-11	3.5897e-06	1e-08
2.0309e-09	3.7333e-10	1.1007e-10	2.0309e-09	1.3747e-10	4.6227e-11	2.0309e-09	2.0068e-10	6.4595e-11	3.8462e-06	1e-08
2.8943e-09	4.7624e-10	1.3921e-10	2.8943e-09	1.74e-10	5.502e-11	2.8943e-09	2.6644e-10	8.1157e-11	4.1026e-06	1e-08
4.1246e-09	6.6425e-10	1.9693e-10	4.1246e-09	2.3812e-10	6.9506e-11	4.1246e-09	3.8357e-10	1.1172e-10	4.359e-06	1e-08
5.878e-09	1.0256e-09	3.186e-10	5.878e-09	3.4895e-10	9.5789e-11	5.878e-09	6.1667e-10	1.7721e-10	4.6154e-06	1e-08
8.3768e-09	1.7569e-09	5.9124e-10	8.3768e-09	5.5087e-10	1.4883e-10	8.3768e-09	1.0892e-09	3.2473e-10	4.8718e-06	1e-08
1.1938e-08	2.9872e-09	1.0409e-09	1.1938e-08	9.4983e-10	2.7461e-10	1.1938e-08	2.06e-09	6.7812e-10	5.1282e-06	1e-08
1.7013e-08	4.5047e-09	1.6309e-09	1.7013e-08	1.7763e-09	5.7038e-10	1.7013e-08	3.5756e-09	1.2538e-09	5.3846e-06	1e-08
2.4245e-08	6.0024e-09	2.2047e-09	2.4245e-08	3.1734e-09	1.0887e-09	2.4245e-08	5.2353e-09	1.8939e-09	5.641e-06	1e-08
3.4551e-08	7.1359e-09	2.5791e-09	3.4551e-08	4.8183e-09	1.7298e-09	3.4551e-08	6.5314e-09	2.3185e-09	5.8974e-06	1e-08
4.9239e-08	8.0538e-09	2.8668e-09	4.9239e-08	6.3036e-09	2.2907e-09	4.9239e-08	7.5652e-09	2.6926e-09	6.1538e-06	1e-08
7.017e-08	8.6289e-09	3.0721e-09	7.017e-08	7.3852e-09	2.6257e-09	7.017e-08	8.3223e-09	2.9887e-09	6.4103e-06	1e-08
1e-07	8.9526e-09	3.1146e-09	1e-07	8.1879e-09	2.8998e-09	1e-07	8.8704e-09	3.0973e-09	6.6667e-06	1e-08
1.4251e-07	9.2812e-09	3.2558e-09	1.4251e-07	8.6841e-09	3.0595e-09	1.4251e-07	9.1651e-09	3.2899e-09	6.9231e-06	1e-08
2.0309e-07	9.4585e-09	3.3231e-09	2.0309e-07	9.0981e-09	3.2201e-09	2.0309e-07	9.371e-09	3.2896e-09	7.1795e-06	1e-08
2.8943e-07	9.6156e-09	3.3996e-09	2.8943e-07	9.34e-09	3.3662e-09	2.8943e-07	9.6131e-09	3.3913e-09	7.4359e-06	1e-08
4.1246e-07	9.7435e-09	3.4158e-09	4.1246e-07	9.5971e-09	3.3137e-09	4.1246e-07	9.7371e-09	3.4361e-09	7.6923e-06	1e-08
5.878e-07	9.9465e-09	3.5551e-09	5.878e-07	9.6871e-09	3.4312e-09	5.878e-07	9.7755e-09	3.3852e-09	7.9487e-06	1e-08
8.3768e-07	9.8506e-09	3.4582e-09	8.3768e-07	9.8123e-09	3.4042e-09	8.3768e-07	9.8656e-09	3.4174e-09	8.2051e-06	1e-08
1.1938e-06	9.9656e-09	3.4791e-09	1.1938e-06	9.8948e-09	3.4893e-09	1.1938e-06	9.9933e-09	3.4829e-09	8.4615e-06	1e-08
1.7013e-06	9.9411e-09	3.4765e-09	1.7013e-06	9.917e-09	3.4601e-09	1.7013e-06	9.9123e-09	3.4992e-09	8.718e-06	1e-08
2.4245e-06	1.003e-08	3.5166e-09	2.4245e-06	1.0001e-08	3.4897e-09	2.4245e-06	9.9752e-09	3.5181e-09	8.9744e-06	1e-08
3.4551e-06	1.0063e-08	3.5325e-09	3.4551e-06	9.9845e-09	3.4632e-09	3.4551e-06	9.9665e-09	3.5145e-09	9.2308e-06	1e-08
4.9239e-06	9.9546e-09	3.4879e-09	4.9239e-06	1.005e-08	3.5351e-09	4.9239e-06	9.9743e-09	3.485e-09	9.4872e-06	1e-08
7.017e-06	9.9638e-09	3.4715e-09	7.017e-06	9.8907e-09	3.4257e-09	7.017e-06	9.9364e-09	3.4527e-09	9.7436e-06	1e-08
1e-05	1.0021e-08	3.497e-09	1e-05	1.0005e-08	3.5085e-09	1e-05	9.9358e-09	3.5394e-09	1e-05	1e-08
