# Supplementary material for: Noncovalent antibody catenation on a target surface greatly increases the antigen-binding avidity
Source: eLife. 2023 May 30;12:e81646. doi: 10.7554/eLife.81646 (PMC10229114; doi:10.7554/eLife.81646)
Supplement: Figure 4—source data 2. [file elife-81646-fig4-data2.xlsx]

## Sheet: Data3_Irregularly_spaced_BO
p=1.47 per 7 x 7 nm2			p= 2.94			p= 4.41			p= 8.82			p= 11.76			Control
kD_catenator	Binding Occupancy	stdev of Binding Occupancy	kD_catenator	Binding Occupancy	stdev of Binding Occupancy	kD_catenator	Binding Occupancy	stdev of Binding Occupancy	kD_catenator	Binding Occupancy	stdev of Binding Occupancy	kD_catenator	Binding Occupancy	stdev of Binding Occupancy	kD_catenator	Binding Occupancy
1e-11	0.5982	0.1009	1e-11	0.8991	0.0596	1e-11	0.9373	0.0456	1e-11	0.9673	0.0344	1e-11	0.9736	0.0324	1e-11	0.1
1.4251e-11	0.5955	0.1004	1.4251e-11	0.8995	0.0589	1.4251e-11	0.9367	0.0451	1.4251e-11	0.9673	0.0343	1.4251e-11	0.9745	0.0321	2.5642e-07	0.1
2.0309e-11	0.5973	0.1013	2.0309e-11	0.8986	0.0594	2.0309e-11	0.938	0.0458	2.0309e-11	0.9683	0.0338	2.0309e-11	0.9757	0.0308	5.1283e-07	0.1
2.8943e-11	0.5912	0.1012	2.8943e-11	0.9	0.06	2.8943e-11	0.939	0.0454	2.8943e-11	0.9704	0.0329	2.8943e-11	0.9751	0.0316	7.6924e-07	0.1
4.1246e-11	0.5853	0.1052	4.1246e-11	0.9001	0.0587	4.1246e-11	0.9389	0.0458	4.1246e-11	0.9704	0.0329	4.1246e-11	0.977	0.0303	1.0256e-06	0.1
5.878e-11	0.5846	0.1043	5.878e-11	0.8987	0.0599	5.878e-11	0.9409	0.0457	5.878e-11	0.9721	0.0316	5.878e-11	0.9769	0.03	1.2821e-06	0.1
8.3768e-11	0.5811	0.1033	8.3768e-11	0.8985	0.0593	8.3768e-11	0.9424	0.0436	8.3768e-11	0.973	0.0324	8.3768e-11	0.9787	0.0293	1.5385e-06	0.1
1.1938e-10	0.5683	0.1035	1.1938e-10	0.8958	0.0595	1.1938e-10	0.9457	0.0439	1.1938e-10	0.9748	0.0311	1.1938e-10	0.9792	0.029	1.7949e-06	0.1
1.7013e-10	0.5562	0.1056	1.7013e-10	0.8957	0.061	1.7013e-10	0.9468	0.0432	1.7013e-10	0.9767	0.0302	1.7013e-10	0.9804	0.0275	2.0513e-06	0.1
2.4245e-10	0.5452	0.1074	2.4245e-10	0.8913	0.0597	2.4245e-10	0.9498	0.042	2.4245e-10	0.9779	0.0286	2.4245e-10	0.9827	0.0259	2.3077e-06	0.1
3.4551e-10	0.5247	0.1109	3.4551e-10	0.8894	0.0612	3.4551e-10	0.9529	0.0406	3.4551e-10	0.9803	0.0272	3.4551e-10	0.985	0.0232	2.5641e-06	0.1
4.9239e-10	0.5039	0.1083	4.9239e-10	0.8826	0.0629	4.9239e-10	0.9552	0.0387	4.9239e-10	0.9822	0.0257	4.9239e-10	0.9868	0.0217	2.8205e-06	0.1
7.017e-10	0.4792	0.1127	7.017e-10	0.8763	0.0639	7.017e-10	0.9578	0.0388	7.017e-10	0.9839	0.0241	7.017e-10	0.9883	0.0202	3.0769e-06	0.1
1e-09	0.4488	0.1143	1e-09	0.8637	0.0677	1e-09	0.9579	0.0377	1e-09	0.9864	0.0214	1e-09	0.9896	0.0188	3.3333e-06	0.1
1.4251e-09	0.4174	0.1122	1.4251e-09	0.8503	0.0696	1.4251e-09	0.957	0.0383	1.4251e-09	0.9864	0.0216	1.4251e-09	0.9904	0.0179	3.5897e-06	0.1
2.0309e-09	0.3773	0.1138	2.0309e-09	0.8279	0.075	2.0309e-09	0.9519	0.0403	2.0309e-09	0.9858	0.0218	2.0309e-09	0.9897	0.0181	3.8462e-06	0.1
2.8943e-09	0.3321	0.1106	2.8943e-09	0.8013	0.0809	2.8943e-09	0.943	0.0443	2.8943e-09	0.9829	0.0233	2.8943e-09	0.9878	0.0198	4.1026e-06	0.1
4.1246e-09	0.2884	0.1066	4.1246e-09	0.761	0.0895	4.1246e-09	0.9271	0.0493	4.1246e-09	0.979	0.0263	4.1246e-09	0.9848	0.0226	4.359e-06	0.1
5.878e-09	0.2453	0.1013	5.878e-09	0.7094	0.0992	5.878e-09	0.9062	0.057	5.878e-09	0.9708	0.0306	5.878e-09	0.98	0.0256	4.6154e-06	0.1
8.3768e-09	0.2109	0.0939	8.3768e-09	0.6408	0.1113	8.3768e-09	0.871	0.0676	8.3768e-09	0.961	0.0354	8.3768e-09	0.9716	0.0304	4.8718e-06	0.1
1.1938e-08	0.1765	0.0866	1.1938e-08	0.5477	0.1234	1.1938e-08	0.8223	0.081	1.1938e-08	0.9439	0.0427	1.1938e-08	0.9601	0.0372	5.1282e-06	0.1
1.7013e-08	0.1511	0.0795	1.7013e-08	0.4414	0.1282	1.7013e-08	0.7518	0.0947	1.7013e-08	0.9211	0.0512	1.7013e-08	0.9438	0.0429	5.3846e-06	0.1
2.4245e-08	0.1308	0.0712	2.4245e-08	0.3339	0.1239	2.4245e-08	0.6487	0.1126	2.4245e-08	0.8887	0.0607	2.4245e-08	0.9209	0.052	5.641e-06	0.1
3.4551e-08	0.1195	0.0664	3.4551e-08	0.2507	0.11	3.4551e-08	0.5214	0.1253	3.4551e-08	0.8404	0.0747	3.4551e-08	0.8882	0.0612	5.8974e-06	0.1
4.9239e-08	0.1126	0.062	4.9239e-08	0.1883	0.0931	4.9239e-08	0.3792	0.1286	4.9239e-08	0.7737	0.0892	4.9239e-08	0.8397	0.0727	6.1538e-06	0.1
7.017e-08	0.1024	0.0586	7.017e-08	0.1497	0.0799	7.017e-08	0.2685	0.1175	7.017e-08	0.6793	0.1042	7.017e-08	0.7768	0.0894	6.4103e-06	0.1
1e-07	0.1	0.0567	1e-07	0.1306	0.0725	1e-07	0.1942	0.0975	1e-07	0.5559	0.124	1e-07	0.6862	0.1046	6.6667e-06	0.1
1.4251e-07	0.0971	0.0549	1.4251e-07	0.1144	0.0644	1.4251e-07	0.1487	0.0799	1.4251e-07	0.4055	0.1321	1.4251e-07	0.5639	0.1171	6.9231e-06	0.1
2.0309e-07	0.0948	0.0547	2.0309e-07	0.1084	0.0616	2.0309e-07	0.1277	0.0708	2.0309e-07	0.2742	0.1183	2.0309e-07	0.4162	0.1298	7.1795e-06	0.1
2.8943e-07	0.0944	0.0542	2.8943e-07	0.1012	0.0583	2.8943e-07	0.1142	0.065	2.8943e-07	0.19	0.0983	2.8943e-07	0.281	0.1221	7.4359e-06	0.1
4.1246e-07	0.0935	0.0548	4.1246e-07	0.0996	0.0561	4.1246e-07	0.1052	0.0609	4.1246e-07	0.1489	0.0804	4.1246e-07	0.1937	0.1	7.6923e-06	0.1
5.878e-07	0.0914	0.0529	5.878e-07	0.0953	0.0555	5.878e-07	0.1008	0.0579	5.878e-07	0.1259	0.0706	5.878e-07	0.1457	0.0798	7.9487e-06	0.1
8.3768e-07	0.0913	0.0533	8.3768e-07	0.0945	0.0546	8.3768e-07	0.0986	0.0565	8.3768e-07	0.1115	0.0636	8.3768e-07	0.1267	0.0722	8.2051e-06	0.1
1.1938e-06	0.0919	0.0529	1.1938e-06	0.0936	0.0548	1.1938e-06	0.0965	0.0557	1.1938e-06	0.1048	0.0602	1.1938e-06	0.1118	0.0647	8.4615e-06	0.1
1.7013e-06	0.0915	0.0532	1.7013e-06	0.0936	0.0526	1.7013e-06	0.0954	0.0541	1.7013e-06	0.1011	0.0579	1.7013e-06	0.1058	0.0607	8.718e-06	0.1
2.4245e-06	0.0903	0.0533	2.4245e-06	0.0905	0.0528	2.4245e-06	0.0926	0.0535	2.4245e-06	0.099	0.0557	2.4245e-06	0.1006	0.0571	8.9744e-06	0.1
3.4551e-06	0.0916	0.053	3.4551e-06	0.0906	0.0525	3.4551e-06	0.0922	0.0536	3.4551e-06	0.0944	0.0546	3.4551e-06	0.0964	0.0558	9.2308e-06	0.1
4.9239e-06	0.091	0.0522	4.9239e-06	0.0931	0.0532	4.9239e-06	0.0928	0.0528	4.9239e-06	0.0931	0.0535	4.9239e-06	0.097	0.0556	9.4872e-06	0.1
7.017e-06	0.0919	0.0521	7.017e-06	0.0907	0.0524	7.017e-06	0.0924	0.0525	7.017e-06	0.0948	0.0536	7.017e-06	0.0945	0.055	9.7436e-06	0.1
1e-05	0.0903	0.0524	1e-05	0.0926	0.0533	1e-05	0.0923	0.0532	1e-05	0.0919	0.0522	1e-05	0.093	0.0535	1e-05	0.1

## Sheet: Data3_Irregularly_spaced_kDeff
p=1.47 per 7 x 7 nm2			p= 2.94			p= 4.41			p= 8.82			p= 11.76			Control
kD_catenator	kD_eff	stdev of kD_eff	kD_catenator	kD_eff	stdev of kD_eff	kD_catenator	kD_eff	stdev of kD_eff	kD_catenator	kD_eff	stdev of kD_eff	kD_catenator	kD_eff	stdev of kD_eff	kD_catenator	kD_eff
1e-11	6.7163e-10	2.8208e-10	1e-11	1.1219e-10	7.3736e-11	1e-11	6.6907e-11	5.1895e-11	1e-11	3.3821e-11	3.6789e-11	1e-11	2.7081e-11	3.4135e-11	1e-11	1e-08
1.4251e-11	6.7915e-10	2.8319e-10	1.4251e-11	1.1168e-10	7.2775e-11	1.4251e-11	6.7547e-11	5.144e-11	1.4251e-11	3.383e-11	3.6625e-11	1.4251e-11	2.6198e-11	3.3781e-11	2.5642e-07	1e-08
2.0309e-11	6.7427e-10	2.8383e-10	2.0309e-11	1.1288e-10	7.3609e-11	2.0309e-11	6.6074e-11	5.2006e-11	2.0309e-11	3.2761e-11	3.6094e-11	2.0309e-11	2.494e-11	3.2388e-11	5.1283e-07	1e-08
2.8943e-11	6.9151e-10	2.8948e-10	2.8943e-11	1.1107e-10	7.4069e-11	2.8943e-11	6.4956e-11	5.151e-11	2.8943e-11	3.0509e-11	3.4989e-11	2.8943e-11	2.5555e-11	3.3284e-11	7.6924e-07	1e-08
4.1246e-11	7.0854e-10	3.0698e-10	4.1246e-11	1.1103e-10	7.2478e-11	4.1246e-11	6.5076e-11	5.2005e-11	4.1246e-11	3.0527e-11	3.4974e-11	4.1246e-11	2.3565e-11	3.1714e-11	1.0256e-06	1e-08
5.878e-11	7.1044e-10	3.0518e-10	5.878e-11	1.1277e-10	7.4118e-11	5.878e-11	6.2865e-11	5.1581e-11	5.878e-11	2.8724e-11	3.3445e-11	5.878e-11	2.3633e-11	3.1449e-11	1.2821e-06	1e-08
8.3768e-11	7.2086e-10	3.0582e-10	8.3768e-11	1.1296e-10	7.3453e-11	8.3768e-11	6.1103e-11	4.9084e-11	8.3768e-11	2.7734e-11	3.4269e-11	8.3768e-11	2.1803e-11	3.0638e-11	1.5385e-06	1e-08
1.1938e-10	7.597e-10	3.2059e-10	1.1938e-10	1.1634e-10	7.4169e-11	1.1938e-10	5.7378e-11	4.909e-11	1.1938e-10	2.5821e-11	3.2758e-11	1.1938e-10	2.1251e-11	3.0242e-11	1.7949e-06	1e-08
1.7013e-10	7.9791e-10	3.415e-10	1.7013e-10	1.1648e-10	7.6008e-11	1.7013e-10	5.6178e-11	4.8185e-11	1.7013e-10	2.3881e-11	3.1685e-11	1.7013e-10	1.9963e-11	2.8638e-11	2.0513e-06	1e-08
2.4245e-10	8.3433e-10	3.6147e-10	2.4245e-10	1.2202e-10	7.5202e-11	2.4245e-10	5.2803e-11	4.6598e-11	2.4245e-10	2.2611e-11	2.9958e-11	2.4245e-10	1.7631e-11	2.6789e-11	2.3077e-06	1e-08
3.4551e-10	9.06e-10	4.0283e-10	3.4551e-10	1.2437e-10	7.7411e-11	3.4551e-10	4.9386e-11	4.4677e-11	3.4551e-10	2.0098e-11	2.8301e-11	3.4551e-10	1.5227e-11	2.396e-11	2.5641e-06	1e-08
4.9239e-10	9.844e-10	4.2632e-10	4.9239e-10	1.3305e-10	8.0713e-11	4.9239e-10	4.6946e-11	4.2373e-11	4.9239e-10	1.812e-11	2.6656e-11	4.9239e-10	1.3402e-11	2.2317e-11	2.8205e-06	1e-08
7.017e-10	1.0869e-09	4.9068e-10	7.017e-10	1.4112e-10	8.3182e-11	7.017e-10	4.4072e-11	4.2242e-11	7.017e-10	1.6386e-11	2.4887e-11	7.017e-10	1.1858e-11	2.0723e-11	3.0769e-06	1e-08
1e-09	1.2283e-09	5.6772e-10	1e-09	1.5783e-10	9.0728e-11	1e-09	4.3939e-11	4.1059e-11	1e-09	1.3778e-11	2.1976e-11	1e-09	1.0518e-11	1.9176e-11	3.3333e-06	1e-08
1.4251e-09	1.3957e-09	6.4409e-10	1.4251e-09	1.761e-10	9.6321e-11	1.4251e-09	4.4907e-11	4.177e-11	1.4251e-09	1.3769e-11	2.2182e-11	1.4251e-09	9.6462e-12	1.8267e-11	3.5897e-06	1e-08
2.0309e-09	1.6503e-09	7.9944e-10	2.0309e-09	2.0792e-10	1.0948e-10	2.0309e-09	5.0535e-11	4.4436e-11	2.0309e-09	1.4422e-11	2.2385e-11	2.0309e-09	1.0377e-11	1.8522e-11	3.8462e-06	1e-08
2.8943e-09	2.0114e-09	1.0031e-09	2.8943e-09	2.4794e-10	1.2595e-10	2.8943e-09	6.0462e-11	4.9839e-11	2.8943e-09	1.7362e-11	2.4132e-11	2.8943e-09	1.2316e-11	2.0294e-11	4.1026e-06	1e-08
4.1246e-09	2.4669e-09	1.2813e-09	4.1246e-09	3.1407e-10	1.5461e-10	4.1246e-09	7.869e-11	5.7341e-11	4.1246e-09	2.1412e-11	2.7464e-11	4.1246e-09	1.5386e-11	2.3333e-11	4.359e-06	1e-08
5.878e-09	3.077e-09	1.6833e-09	5.878e-09	4.0974e-10	1.9718e-10	5.878e-09	1.0349e-10	6.9348e-11	5.878e-09	3.0112e-11	3.2457e-11	5.878e-09	2.0429e-11	2.6708e-11	4.6154e-06	1e-08
8.3768e-09	3.7406e-09	2.1111e-09	8.3768e-09	5.6064e-10	2.7118e-10	8.3768e-09	1.4814e-10	8.9083e-11	8.3768e-09	4.0545e-11	3.8348e-11	8.3768e-09	2.9266e-11	3.2232e-11	4.8718e-06	1e-08
1.1938e-08	4.6653e-09	2.7801e-09	1.1938e-08	8.2585e-10	4.1147e-10	1.1938e-08	2.1613e-10	1.1979e-10	1.1938e-08	5.9402e-11	4.7975e-11	1.1938e-08	4.1577e-11	4.0362e-11	5.1282e-06	1e-08
1.7013e-08	5.6161e-09	3.479e-09	1.7013e-08	1.2656e-09	6.5804e-10	1.7013e-08	3.3013e-10	1.6763e-10	1.7013e-08	8.5656e-11	6.0379e-11	1.7013e-08	5.9603e-11	4.8206e-11	5.3846e-06	1e-08
2.4245e-08	6.6437e-09	4.1623e-09	2.4245e-08	1.9952e-09	1.1113e-09	2.4245e-08	5.4153e-10	2.6751e-10	2.4245e-08	1.2523e-10	7.6891e-11	2.4245e-08	8.5848e-11	6.1309e-11	5.641e-06	1e-08
3.4551e-08	7.3694e-09	4.6499e-09	3.4551e-08	2.9887e-09	1.75e-09	3.4551e-08	9.1799e-10	4.6086e-10	3.4551e-08	1.8989e-10	1.0575e-10	3.4551e-08	1.2582e-10	7.7551e-11	5.8974e-06	1e-08
4.9239e-08	7.8799e-09	4.8924e-09	4.9239e-08	4.3112e-09	2.6272e-09	4.9239e-08	1.6369e-09	8.9428e-10	4.9239e-08	2.9244e-10	1.4899e-10	4.9239e-08	1.9087e-10	1.0307e-10	6.1538e-06	1e-08
7.017e-08	8.7648e-09	5.586e-09	7.017e-08	5.679e-09	3.5644e-09	7.017e-08	2.7242e-09	1.63e-09	7.017e-08	4.7216e-10	2.2577e-10	7.017e-08	2.8729e-10	1.4807e-10	6.4103e-06	1e-08
1e-07	8.9992e-09	5.673e-09	1e-07	6.6575e-09	4.2522e-09	1e-07	4.1487e-09	2.5858e-09	1e-07	7.9904e-10	4.0137e-10	1e-07	4.5734e-10	2.2216e-10	6.6667e-06	1e-08
1.4251e-07	9.3009e-09	5.8221e-09	1.4251e-07	7.744e-09	4.9203e-09	1.4251e-07	5.7228e-09	3.6129e-09	1.4251e-07	1.4661e-09	8.0311e-10	1.4251e-07	7.7321e-10	3.6805e-10	6.9231e-06	1e-08
2.0309e-07	9.5531e-09	6.0889e-09	2.0309e-07	8.2287e-09	5.2495e-09	2.0309e-07	6.8337e-09	4.3442e-09	2.0309e-07	2.6474e-09	1.5739e-09	2.0309e-07	1.4029e-09	7.4921e-10	7.1795e-06	1e-08
2.8943e-07	9.5913e-09	6.0755e-09	2.8943e-07	8.8834e-09	5.6942e-09	2.8943e-07	7.759e-09	4.9896e-09	2.8943e-07	4.2619e-09	2.7215e-09	2.8943e-07	2.5587e-09	1.5463e-09	7.4359e-06	1e-08
4.1246e-07	9.6954e-09	6.2652e-09	4.1246e-07	9.0441e-09	5.6646e-09	4.1246e-07	8.5057e-09	5.4985e-09	4.1246e-07	5.714e-09	3.6261e-09	4.1246e-07	4.1637e-09	2.6658e-09	7.6923e-06	1e-08
5.878e-07	9.9353e-09	6.3233e-09	5.878e-07	9.4891e-09	6.102e-09	5.878e-07	8.9209e-09	5.6988e-09	5.878e-07	6.9436e-09	4.4575e-09	5.878e-07	5.8625e-09	3.7585e-09	7.9487e-06	1e-08
8.3768e-07	9.9509e-09	6.3866e-09	8.3768e-07	9.5812e-09	6.1128e-09	8.3768e-07	9.1378e-09	5.8056e-09	8.3768e-07	7.9648e-09	5.1089e-09	8.3768e-07	6.8951e-09	4.5009e-09	8.2051e-06	1e-08
1.1938e-06	9.882e-09	6.2632e-09	1.1938e-06	9.6834e-09	6.2601e-09	1.1938e-06	9.3591e-09	5.9776e-09	1.1938e-06	8.5382e-09	5.4748e-09	1.1938e-06	7.9419e-09	5.1756e-09	8.4615e-06	1e-08
1.7013e-06	9.9304e-09	6.3542e-09	1.7013e-06	9.6806e-09	6.0046e-09	1.7013e-06	9.482e-09	5.9408e-09	1.7013e-06	8.8881e-09	5.6628e-09	1.7013e-06	8.4538e-09	5.4229e-09	8.718e-06	1e-08
2.4245e-06	1.0076e-08	6.5352e-09	2.4245e-06	1.005e-08	6.4444e-09	2.4245e-06	9.8007e-09	6.2374e-09	2.4245e-06	9.1036e-09	5.6845e-09	2.4245e-06	8.9434e-09	5.6494e-09	8.9744e-06	1e-08
3.4551e-06	9.9188e-09	6.3212e-09	3.4551e-06	1.004e-08	6.3982e-09	3.4551e-06	9.8503e-09	6.3086e-09	3.4551e-06	9.5977e-09	6.1312e-09	3.4551e-06	9.3687e-09	5.9942e-09	9.2308e-06	1e-08
4.9239e-06	9.9881e-09	6.2996e-09	4.9239e-06	9.745e-09	6.1434e-09	4.9239e-06	9.7761e-09	6.1299e-09	4.9239e-06	9.745e-09	6.1815e-09	4.9239e-06	9.3053e-09	5.9099e-09	9.4872e-06	1e-08
7.017e-06	9.8849e-09	6.1776e-09	7.017e-06	1.002e-08	6.3605e-09	7.017e-06	9.8226e-09	6.1453e-09	7.017e-06	9.5495e-09	5.9629e-09	7.017e-06	9.5831e-09	6.1624e-09	9.7436e-06	1e-08
1e-05	1.0077e-08	6.43e-09	1e-05	9.7941e-09	6.2055e-09	1e-05	9.8341e-09	6.2465e-09	1e-05	9.884e-09	6.1838e-09	1e-05	9.7516e-09	6.188e-09	1e-05	1e-08
